# 1 **Synaptic mitochondria are critical for hair-cell synapse formation and function**

2

3 Hiu-tung C. Wong<sup>1,2</sup>, Qiuxiang Zhang<sup>1</sup>, Alisha J. Beirl<sup>1</sup>, Ronald S. Petralia<sup>3</sup>, Ya-Xian Wang<sup>3</sup>, Katie  
4 S. Kindt<sup>1\*</sup>

5

6 <sup>1</sup>Section on Sensory Cell Development and Function

7 NIDCD/National Institutes of Health

8 Bethesda, MD 20892 USA

9

10 <sup>2</sup>National Institutes of Health-Johns Hopkins University Graduate Partnership Program,

11 NIDCD/National Institutes of Health

12 Bethesda, MD 20892 USA

13

14 <sup>3</sup>Advanced Imaging Core

15 NIDCD/National Institutes of Health

16 Bethesda, MD 20892, USA

17

18 **\* Corresponding author**

19 Katie Kindt: [katie.kindt@nih.gov](mailto:katie.kindt@nih.gov)

20

## 21 **Summary**

22       Sensory hair cells in the ear utilize specialized ribbon synapses. These synapses are  
23 defined by electron-dense presynaptic structures called ribbons, composed primarily of the  
24 structural protein Ribeye. Previous work has shown that voltage-gated influx of Ca<sup>2+</sup> through  
25 Ca<sub>v</sub>1.3 channels is critical for hair-cell synapse function and can impede ribbon formation. We  
26 show that in mature zebrafish hair cells, evoked presynaptic-Ca<sup>2+</sup> influx through Ca<sub>v</sub>1.3 channels  
27 initiates mitochondrial-Ca<sup>2+</sup> (mito-Ca<sup>2+</sup>) uptake adjacent to ribbons. Block of mito-Ca<sup>2+</sup> uptake in  
28 mature cells depresses presynaptic Ca<sup>2+</sup> influx and impacts synapse integrity. In developing  
29 zebrafish hair cells, mito-Ca<sup>2+</sup> uptake coincides with spontaneous rises in presynaptic Ca<sup>2+</sup> influx.  
30 Spontaneous mito-Ca<sup>2+</sup> loading lowers cellular NAD<sup>+</sup>/NADH redox and downregulates ribbon  
31 formation. Direct application of NAD<sup>+</sup> or NADH increases or decreases ribbon formation  
32 respectively, possibly acting through the NAD(H)-binding domain on Ribeye. Our results present  
33 a mechanism where presynaptic- and mito-Ca<sup>2+</sup> couple to confer proper presynaptic function  
34 and formation.

35

36 **Keywords:** Hair cell, ribbon synapse, mitochondria, Ca<sup>2+</sup>, NAD(H) redox

37

## 38 **Introduction**

39           Neurotransmission is an energy demanding process that relies heavily on mitochondria.  
40 In neurons, mitochondria dysfunction has been implicated in synaptopathies that impact  
41 neurodevelopment, learning and memory, and can contribute to neurodegeneration (Flippo  
42 and Strack, 2017; Lepeta et al., 2016; Todorova and Blokland, 2017). In hair cells, sensory  
43 neurotransmission relies on specialized ribbon synapses to facilitate rapid and sustained vesicle  
44 release that is particularly energy demanding (reviewed in: Johnson et al., 2019; Lagnado and  
45 Schmitz, 2015; Matthews and Fuchs, 2010; Safieddine et al., 2012). Although mitochondria  
46 dysfunction has been implicated in hearing loss (Böttger and Schacht, 2013; Fischel-Ghodsian et  
47 al., 2004; Kokotas et al., 2007), the precise role mitochondria play at hair-cell synapses remains  
48 unclear.

49           Ribbon synapses are characterized by a unique presynaptic structure called a “ribbon”  
50 that tethers and stabilizes synaptic vesicles at the active zone (reviewed in: Matthews and  
51 Fuchs, 2010). In hair cells, neurotransmission at ribbon synapses requires the presynaptic-Ca<sup>2+</sup>  
52 channel Cav1.3 (Brandt et al., 2003; Kollmar et al., 1997; Sidi et al., 2004). Hair-cell  
53 depolarization opens Cav1.3 channels, resulting in a spatially restricted increase of Ca<sup>2+</sup> at  
54 presynaptic ribbons that triggers vesicle fusion. Tight spatial regulation of presynaptic Ca<sup>2+</sup> is  
55 important for ribbon-synapse function and requires efficient Ca<sup>2+</sup> clearance through a  
56 combination of Ca<sup>2+</sup> pumps, Ca<sup>2+</sup> buffers and intracellular Ca<sup>2+</sup> stores (Carafoli, 2011; Mulkey  
57 and Malenka, 1992; Tucker and Fettiplace, 1995; Yamoah et al., 1998; Zenisek and Matthews,  
58 2000). While ER Ca<sup>2+</sup> stores have been implicated in hair-cell neurotransmission, whether  
59 mitochondrial-Ca<sup>2+</sup> (mito-Ca<sup>2+</sup>) stores play a role in this process remains unclear (Castellano-  
60 Muñoz and Ricci, 2014; Kennedy, 2002; Lioudyno et al., 2004; Tucker and Fettiplace, 1995).

61           In addition to a role in hair-cell neurotransmission, presynaptic Ca<sup>2+</sup> and Cav1.3 channels  
62 also play an important role during inner-ear development. In mammals, prior to hearing onset,  
63 auditory hair cells fire spontaneous Ca<sup>2+</sup> action potentials (Eckrich et al., 2018; Marcotti et al.,  
64 2003; Tritsch et al., 2007, 2010). In mammalian hair cells, these Ca<sup>2+</sup> action potentials are  
65 Cav1.3-dependent and are thought to be important for synapse and circuit formation. In

66 support of this idea, *in vivo* work in zebrafish hair cells found that increasing or decreasing  
67 voltage-gated  $\text{Ca}^{2+}$  influx through  $\text{Ca}_v1.3$  channels during development led to the formation of  
68 smaller or larger ribbons respectively (Sheets et al., 2012). Furthermore, in mouse knockouts of  
69  $\text{Ca}_v1.3$ , auditory outer hair cells have reduced afferent innervation and synapse number  
70 (Ceriani et al., 2019). Mechanistically, how  $\text{Ca}_v1.3$ -channel activity regulates ribbon size and  
71 innervation, and whether hair-cell  $\text{Ca}^{2+}$  stores play a role in this process is not known.

72 Cumulative work has shown that ribbon size varies between species and sensory  
73 epithelia (reviewed in Moser et al., 2006); these variations are thought to reflect important  
74 encoding requirements of a given sensory cell (Matthews and Fuchs, 2010). In auditory hair  
75 cells, excitotoxic noise damage can also alter ribbon size, and lead to hearing deficits (Jensen et  
76 al., 2015; Kujawa and Liberman, 2009; Liberman et al., 2015). Excitotoxic damage is thought to  
77 be initiated by mito- $\text{Ca}^{2+}$  overload and subsequent ROS production (Böttger and Schacht, 2013;  
78 Wang et al., 2018). Mechanistically, precisely how ribbon size is established during  
79 development or altered under pathological conditions is not fully understood.

80 One known way to regulate ribbon formation is through its main structural component  
81 Ribeye (Schmitz et al., 2000a). Perhaps unsurprisingly, previous work has shown that  
82 overexpression or depletion of Ribeye in hair cells can increase or decrease ribbon size  
83 respectively (Becker et al., 2018; Jean et al., 2018; Sheets, 2017; Sheets et al., 2011a). Ribeye is  
84 a splice variant of the transcriptional co-repressor Carboxyl-terminal binding protein 2 (CtBP2) –  
85 a splice variant that is unique to vertebrate evolution (Schmitz et al., 2000a). Ribeye contains a  
86 unique A-domain, and a B-domain that is nearly identical to full-length CtBP2. The B-domain  
87 contains a nicotinamide adenine dinucleotide ( $\text{NAD}^+$ ,  $\text{NADH}$  or  $\text{NAD(H)}$ ) binding site (Schmitz et  
88 al., 2000; Magupalli et al., 2008).  $\text{NAD(H)}$  redox is linked to mitochondrial metabolism  
89 (Srivastava, 2016). Because CtBP is able to bind and detect  $\text{NAD}^+$  and  $\text{NADH}$  levels, it is thought  
90 to function as a metabolic biosensor (Stankiewicz et al., 2014). For example, previous work has  
91 demonstrated that changes in  $\text{NAD(H)}$  redox can impact CtBP oligomerization and its  
92 transcriptional activity (Fjeld et al., 2003; Thio et al., 2004). Interestingly, *in vitro* work has  
93 shown that both  $\text{NAD}^+$  and  $\text{NADH}$  can also promote interactions between Ribeye domains

94 (Magupalli et al., 2008). Whether NAD<sup>+</sup> or NADH can impact Ribeye interactions and ribbon  
95 formation or stability has not been confirmed *in vivo*.

96 In neurons, it is well established that during presynaptic activity, mitochondria clear and  
97 store Ca<sup>2+</sup> at the presynapse (Devine and Kittler, 2018). Additionally, presynaptic activity and  
98 mito-Ca<sup>2+</sup> can couple together to influence cellular bioenergetics, including NAD(H) redox  
99 homeostasis (reviewed in: [Kann and Kovács, 2007](#); [Llorente-Folch et al., 2015](#)). Based on these  
100 studies, we hypothesized that Ca<sup>2+</sup> influx through Cav1.3 channels may regulate mito-Ca<sup>2+</sup>,  
101 which in turn could regulate NAD(H) redox. Changes to cellular bioenergetics and NAD(H) redox  
102 could function to control Ribeye interactions and ribbon formation or impact ribbon-synapse  
103 function and stability.

104 To study the impact of mito-Ca<sup>2+</sup> and NAD(H) redox on ribbon synapses, we examined  
105 hair cells in the lateral-line system of larval zebrafish. This system is advantageous for our  
106 studies because it contains hair cells with easy access for *in vivo* pharmacology, mechanical  
107 stimulation and imaging cellular morphology and function. Within the lateral-line, hair cells are  
108 arranged in clusters called neuromasts. The hair cells and ribbon synapses in each cluster form  
109 rapidly between 2 to 3 days post-fertilization (dpf) but by 5-6 dpf, the majority of hair cells are  
110 mature, and the system is functional (Kindt et al., 2012; McHenry et al., 2009; Metcalfe, 1985;  
111 Murakami et al., 2003; Santos et al., 2006). Thus, these two ages (2-3 dpf and 5-6 dpf) can be  
112 used to study mito-Ca<sup>2+</sup> and NAD(H) redox in developing and mature hair cells respectively.

113 Using this sensory system, we find that presynaptic Ca<sup>2+</sup> influx drives mito-Ca<sup>2+</sup> uptake.  
114 In mature hair cells, mito-Ca<sup>2+</sup> uptake occurs during evoked stimulation and is required to  
115 sustain presynaptic function and ultimately synapse integrity. In developing hair cells, mito-Ca<sup>2+</sup>  
116 uptake coincides with spontaneous rises in presynaptic Ca<sup>2+</sup>. Blocking these spontaneous  
117 changes in Ca<sup>2+</sup> leads to the formation of larger ribbons. Using a redox biosensor, we  
118 demonstrate that specifically in developing hair cells, decreasing mito-Ca<sup>2+</sup> levels increases the  
119 NAD<sup>+</sup>/NADH redox ratio. Furthermore, we show that application of NAD<sup>+</sup> or NADH can increase  
120 or decrease ribbon formation respectively. Overall our results suggest that in hair cells  
121 presynaptic Ca<sup>2+</sup> influx and mito-Ca<sup>2+</sup> uptake couple to impact ribbon formation and function.

122

## 123 **Results**

124

### 125 **Mitochondria are located near presynaptic ribbons**

126 In neurons, synaptic mitochondria have been shown to influence synapse formation,  
127 plasticity and function (Flippo and Strack, 2017; Todorova and Blokland, 2017). Based on this  
128 work, we hypothesized that mitochondria may impact synapses in hair cells. Therefore, we  
129 examined the proximity of mitochondria relative to presynaptic ribbons in zebrafish lateral-line  
130 hair cells. We visualized mitochondria and ribbons using transmission electron microscopy  
131 (TEM) and in live hair cells using Airyscan confocal microscopy.

132 Using TEM, we examined sections that clearly captured ribbons (Example, Figure 1C).  
133 We were able to observe a mitochondrion in close proximity ( $< 1 \mu\text{m}$ ) to ribbons in 74 % of the  
134 sections (Figure 1D, median ribbon-to-mitochondria distance = 174 nm,  $n = 17$  out of 21  
135 sections). To obtain a more comprehensive understanding of the 3D morphology and location  
136 of mitochondria relative to ribbons in live cells, we used Airyscan confocal microscopy. To  
137 visualize these structures in living cells, we used transgenic zebrafish expressing MitoGCaMP3  
138 (Esterberg et al., 2014) and Ribeye a-tagRFP (Sheets et al., 2017) in hair cells to visualize  
139 mitochondria and ribbons respectively. Using this approach, we observed tubular networks of  
140 mitochondria extending from apex to base (Figure 1A-B, E-E', Figure S1A, Movie S1). At the base  
141 of the hair cell, we observed ribbons nestled between branches of mitochondria. Overall our  
142 TEM and Airyscan imaging suggests that in lateral-line hair cells, mitochondria are present near  
143 ribbons and are poised to impact ribbon synapses.

144

### 145 **Mito- $\text{Ca}^{2+}$ uptake at ribbons is MCU and $\text{Ca}_v1.3$ dependent**

146 In zebrafish hair cells, robust rises in mito- $\text{Ca}^{2+}$  have been reported during mechanical  
147 stimulation (Pickett et al., 2018). Due to the proximity of the mitochondria to the ribbon, we  
148 predicted that rises in mito- $\text{Ca}^{2+}$  levels during mechanical stimulation are related to presynapse-  
149 associated rises in  $\text{Ca}^{2+}$ .

150 To test this prediction, we used a fluid-jet to mechanically stimulate hair cells and evoke  
151 presynaptic activity. During stimulation, we used MitoGCaMP3 to monitor mito- $\text{Ca}^{2+}$  in hair

152 cells. As previously reported, we observed robust mito- $\text{Ca}^{2+}$  uptake during stimulation (Figure  
153 1E-F). We examined the subcellular distribution of MitoGCaMP3 signals over time and found  
154 that the signals initiated near ribbons (Figure 1E). During the latter part of the stimulus, and  
155 even after the stimulus terminated, the MitoGCaMP3 signals propagated apically within the  
156 mitochondria, away from the ribbons (Example, Figure 1E-E'', regions 1-3). We characterized  
157 the time course of MitoGCaMP3 signals with regards to onset kinetics and return to baseline.  
158 During a 2-s stimulus, we detected a significant rise in MitoGCaMP3 signals 0.6 s after stimulus  
159 onset (Figure S1B). Interestingly, after the stimulus terminated, MitoGCaMP3 levels took  
160 approximately 5 min to return to baseline (Figure S1C-C'). As previously reported, the kinetics  
161 of MitoGCaMP3 signals in hair cells mitochondria were quite different from signals observed  
162 using cytosolic GCaMP3 (CytoGCaMP3) in hair cells (Pickett et al., 2018). Compared to  
163 MitoGCaMP3 signals, CytoGCaMP3 signals had faster onset kinetics, and a faster return to  
164 baseline (Figure S1B-C, time to rise: 0.06 s, post-stimulus return to baseline: 12 s). These  
165 differences in kinetics indicate that mito- $\text{Ca}^{2+}$  loading operates over slower timescales  
166 compared to the cytosolic compartment. It also confirms that hair-cell stimulation can initiate  
167 long lasting increases in mito- $\text{Ca}^{2+}$ .

168 To verify that MitoGCaMP3 signals reflect  $\text{Ca}^{2+}$  entry into mitochondria, we applied  
169 Ru360, an antagonist of the mito- $\text{Ca}^{2+}$  uniporter (MCU). The MCU is the main pathway for rapid  
170  $\text{Ca}^{2+}$  entry into the mitochondria (Matlib et al., 1998). We found that stimulus-evoked  
171 MitoGCaMP3 signals were blocked in a dose-dependent manner after treatment with Ru360  
172 (Figure 1F). Due to the initiation of mito- $\text{Ca}^{2+}$  near ribbons, we examined whether presynaptic  
173  $\text{Ca}^{2+}$  influx through  $\text{Ca}_v1.3$  channels was the main source of  $\text{Ca}^{2+}$  entering the mitochondria. To  
174 examine  $\text{Ca}_v1.3$  channel contribution to mito- $\text{Ca}^{2+}$  uptake, we applied isradipine, a  $\text{Ca}_v1.3$   
175 channel antagonist. Similar to blocking the MCU, blocking  $\text{Ca}_v1.3$  channels eliminated all  
176 stimulus-evoked MitoGCaMP3 signals (Figure 1F). Overall our MitoGCaMP3 functional imaging  
177 indicates that in hair cells, evoked mito- $\text{Ca}^{2+}$  uptake initiates near ribbons and is dependent on  
178 MCU and  $\text{Ca}_v1.3$  channel function.

179

180 **Mito- $\text{Ca}^{2+}$  uptake occurs in cells with presynaptic  $\text{Ca}^{2+}$  influx**

181 Interestingly, we observed that mito- $\text{Ca}^{2+}$  uptake was only present in ~40 % of cells  
182 (Example, Figure 2A'; n = 10 neuromasts, 146 cells). This observation is consistent with previous  
183 work demonstrating that only ~30 % of hair cells within each neuromast cluster have  
184 presynaptic  $\text{Ca}^{2+}$  signals and are synaptically active (Zhang et al., 2018b). Because presynaptic  
185  $\text{Ca}^{2+}$  signals initiate near mitochondria, it is probable that mito- $\text{Ca}^{2+}$  uptake may occur  
186 specifically in hair cells with synaptic activity.

187 To test whether evoked mito- $\text{Ca}^{2+}$  uptake occurred exclusively in cells with presynaptic  
188  $\text{Ca}^{2+}$  influx, we performed two-color functional imaging. We used a double transgenic approach  
189 that utilized a membrane-localized GCaMP6s (GCaMP6sCAAX; green) to measure presynaptic  
190  $\text{Ca}^{2+}$  signals at the base of hair cells (Jiang et al., 2017a; Sheets et al., 2017), and concurrently  
191 used MitoRGECO1 (red) to examine mito- $\text{Ca}^{2+}$  signals (Figure 2A-B'). Our two-color imaging  
192 approach revealed a strong correlation between the magnitude of the GCaMP6sCAAX and  
193 MitoRGECO1 signals (Figure 2B,  $R^2 = 0.8$ ,  $p < 0.0001$ ; n = 209 cells). We found that the median  
194 MitoRGECO1 signals were 400 % larger in presynaptically active hair cells compared to  
195 presynaptically silent hair cells (Figure 2B'). Together these results suggest that mito- $\text{Ca}^{2+}$   
196 uptake occurs specifically in hair cells with evoked presynaptic- $\text{Ca}^{2+}$  influx.

197

### 198 **Blocking Mito- $\text{Ca}^{2+}$ entry depresses presynaptic $\text{Ca}^{2+}$ signals in mature hair cells**

199 Although we observed mito- $\text{Ca}^{2+}$  uptake specifically in hair cells with active  $\text{Ca}^{2+}$   
200 channels, the impact of mito- $\text{Ca}^{2+}$  uptake on the function of hair-cell synapses was unclear.  
201 Based on previous studies in neurons (Billups and Forsythe, 2002; Levy et al., 2003; Chouhan et  
202 al., 2010; Kwon et al., 2016), we reasoned that mitochondria may also be important to remove  
203 excess  $\text{Ca}^{2+}$  from the hair-cell presynapse to regulate neurotransmission.

204 To determine if mito- $\text{Ca}^{2+}$  uptake impacted presynaptic function, we assayed evoked  
205 presynaptic- $\text{Ca}^{2+}$  signals by monitoring GCaMP6sCAAX signals adjacent to ribbons as described  
206 previously (Example, Figure S2, Sheets et al., 2017; Zhang et al., 2018b). We examined  
207 GCaMP6sCAAX signals in mature-hair cells at 5-6 dpf when neuromast organs are largely  
208 mature (Kindt et al., 2012; McHenry et al., 2009; Metcalfe, 1985; Murakami et al., 2003; Santos  
209 et al., 2006). Using this approach, we assayed presynaptic GCaMP6sCAAX signals before and

210 after a 20-min application of the MCU antagonist Ru360 (Figure 2C-D'). We found that during  
211 short, 200-ms stimuli, GCaMP6sCAAX signals at ribbons were reduced after complete MCU  
212 block (10  $\mu$ M Ru360, Figure 2C-C'). Reduction of GCaMP6sCAAX signals were further  
213 exacerbated during sustained 10-s stimuli, even when the MCU was only partially blocked (2  
214  $\mu$ M Ru360, Figure 2D-D'). These results suggest that in mature hair cells, evoked mito-Ca<sup>2+</sup>  
215 uptake is critical for presynaptic Ca<sup>2+</sup> influx, especially during sustained stimulation.

216

### 217 **Evoked mito-Ca<sup>2+</sup> uptake is important for mature synapse integrity and cell health**

218 MCU block could impair presynaptic Ca<sup>2+</sup> influx through several mechanisms. It could  
219 impair the biophysical properties of Cav1.3 channels, for example, through Ca<sup>2+</sup>-dependent  
220 inactivation (Platzer et al., 2000; Schnee and Ricci, 2003). In addition, mito-Ca<sup>2+</sup> has been  
221 implicated in synapse dysfunction and cell death (Esterberg et al., 2014; Vos et al., 2010; Wang  
222 et al., 2018), and MCU block could be pathological. To distinguish between these possibilities,  
223 we assessed whether synapse or hair-cell number were altered after MCU block with Ru360.

224 To quantify ribbon-synapse morphology after MCU block, we immunostained mature-  
225 hair cells (5 dpf) with Ribeye b and MAGUK antibodies to label presynaptic ribbons and  
226 postsynaptic densities (MAGUK) respectively. We first applied 2  $\mu$ M Ru360 for 1 hr, a  
227 concentration that partially reduces evoked mito-Ca<sup>2+</sup> uptake (See Figure 1F') yet is effective at  
228 reducing sustained presynaptic Ca<sup>2+</sup> influx (See Figure 2D-D'). At this dose, Ru360 had no impact  
229 on hair cell or synapse number (Figure 3E). In addition, we observed no morphological change  
230 in ribbon or postsynapse size (Figure 3F, Figure S3A). These findings indicate that partial MCU  
231 block can impair presynaptic function without any observable pathology.

232 We also tested a higher dose of Ru360 (10  $\mu$ M) that completely blocks evoked mito-Ca<sup>2+</sup>  
233 uptake (See Figure 1F). Interestingly, a 30-min or 1-hr 10  $\mu$ M Ru360 treatment had a  
234 progressive impact on synapse and cellular integrity. After a 30-min treatment with 10  $\mu$ M  
235 Ru360 we observed significantly fewer complete synapses per hair cell, but not fewer hair cells  
236 compared to controls (Figure 3E; Hair cells per neuromast, control: 16.3, 30-min 10  $\mu$ M Ru360:  
237 15.5;  $p = 0.5$ ). In addition, after the 30-min treatment, ribbons were significantly larger (Figure  
238 3F). The pathological effects of MCU block were more pronounced after a 1-hr, 10  $\mu$ M Ru360



239 treatment. After 1-hr, there was both fewer hair cells per neuromast (Hair cells per neuromast,  
240 control: 18.1, 1-hr 10  $\mu$ M Ru360: 12.0;  $p > 0.0001$ ) and fewer synapses per hair cell (Figure 3E).  
241 Similar to 30-min treatments with Ru360, after 1 hr, ribbons were also significantly larger  
242 (Figure 3F). Neither 30-min nor 1-hr 10  $\mu$ M Ru360 treatment altered postsynapse size (Figure  
243 S3A). Overall, our results indicate that in mature hair cells, partial block of mito- $\text{Ca}^{2+}$  uptake can  
244 impair presynaptic function without altering presynaptic morphology or synapse integrity.  
245 Complete block of mito- $\text{Ca}^{2+}$  uptake is pathological; it impairs presynaptic function, alters  
246 presynaptic morphology, and results in a loss of synapses and hair-cells.

247

### 248 **Spontaneous presynaptic and mito- $\text{Ca}^{2+}$ influx pair in developing hair cells**

249 In addition to evoked presynaptic- and mito- $\text{Ca}^{2+}$  signals in hair cells, we also observed  
250 instances of spontaneous presynaptic- and mito- $\text{Ca}^{2+}$  signals (Example, Figure 4A-A''', Movie  
251 S2). Numerous studies have demonstrated that mammalian hair cells have spontaneous  
252 presynaptic- $\text{Ca}^{2+}$  influx during development (Eckrich et al., 2018; Marcotti et al., 2003; Tritsch et  
253 al., 2007, 2010). Therefore, we predicted that similar to mammals, spontaneous presynaptic-  
254  $\text{Ca}^{2+}$  uptake may be a feature of development. Furthermore, we predicted that spontaneous  
255 mito- $\text{Ca}^{2+}$  uptake may correlate with instances of spontaneous presynaptic- $\text{Ca}^{2+}$  influx.

256 First we tested whether spontaneous presynaptic- $\text{Ca}^{2+}$  signals were a feature of  
257 development. In zebrafish neuromasts, hair cells are rapidly added between 2-3 dpf, but by 5-6  
258 dpf relatively fewer cells are added and the hair cells and the organs are largely mature (Kindt  
259 et al., 2012; McHenry et al., 2009; Metcalfe, 1985; Murakami et al., 2003; Santos et al., 2006).  
260 Therefore, we examined the magnitude and frequency of spontaneous, presynaptic  
261 GCaMP6sCAAX signals in developing (3 dpf) and mature hair cells (5 dpf). We found that in  
262 developing hair cells, spontaneous GCaMP6sCAAX signals occurred with larger magnitudes and  
263 more frequency compared to those in mature hair cells (Figure 4B-C). Our spontaneous  
264 GCaMP6sCAAX imaging demonstrates that similar to mammals, spontaneous presynaptic  $\text{Ca}^{2+}$   
265 activity is a feature of developing zebrafish hair cells.

266 Next, we tested whether spontaneous mito- $\text{Ca}^{2+}$  uptake and presynaptic- $\text{Ca}^{2+}$  influx  
267 were correlated. For this analysis we concurrently imaged GCaMP6sCAAX and MitoRGECO1

268 signals in the same cells for 15 mins to measure presynaptic and mito- $\text{Ca}^{2+}$  responses  
269 respectively. We found that spontaneous presynaptic- $\text{Ca}^{2+}$  influx was often associated with  
270 spontaneous mito- $\text{Ca}^{2+}$  uptake (Example, Figure 4A-A'''). Overall, we observed a high  
271 correlation between the rise and fall of these two signals within individual cells (Figure A''-A''').  
272 Both of these signals and their correlation are abolished by application of the  $\text{Ca}_v1.3$ -channel  
273 antagonist isradipine (Figure S4). Together these experiments indicate that, similar to our  
274 evoked experiments, spontaneous presynaptic- and mito-  $\text{Ca}^{2+}$  signals are correlated.

275

### 276 **Spontaneous mito- $\text{Ca}^{2+}$ uptake regulates ribbon formation**

277 Previous work in zebrafish demonstrated that  $\text{Ca}_v1.3$  channel activity plays a role in  
278 ribbon formation specifically during development (Sheets et al., 2012). This work found that a  
279 transient, 1-hr pharmacological block of  $\text{Ca}_v1.3$  channels increased ribbon size, while  $\text{Ca}_v1.3$   
280 channel agonists decreased ribbon size (Figure 5E; Sheets et al., 2012). Therefore, spontaneous  
281  $\text{Ca}_v1.3$  and MCU  $\text{Ca}^{2+}$  activities could function together to control ribbon size in developing hair  
282 cells.

283 To characterize the role of MCU function and spontaneous mito- $\text{Ca}^{2+}$  uptake on ribbon  
284 formation, we applied the MCU antagonist Ru360 to developing hair cells (3 dpf). After this  
285 treatment, we quantified ribbon synapse morphology by immunostaining hair cells to label  
286 presynaptic ribbons and postsynaptic densities. After a 1-hr application of 2  $\mu\text{M}$  Ru360 to block  
287 the MCU, we observed a significant increase in ribbon size in developing hair cells (Figure 5A-B,  
288 E). In contrast, this same treatment did not impact ribbon size in mature hair cells (Figure 3F).  
289 We also applied a higher concentration of Ru360 (10  $\mu\text{M}$ ) to developing hair cells for 1 hr. In  
290 developing hair cells, after a 1-hr 10  $\mu\text{M}$  Ru360 treatment, we also observed a significant  
291 increase in ribbon size (Figure 5A, C, E). Unlike in mature hair cells (Figure 3), in developing hair  
292 cells, these concentrations of the MCU antagonist did not alter the number of hair cells, nor the  
293 number of synapses per hair cell (Figure 5D; Hair cells per neuromast, control: 9.0, 1-hr 10  $\mu\text{M}$   
294 Ru360: 8.8,  $p = 0.3$ ). All morphological changes were restricted to the ribbons, as MCU block did  
295 not alter the size of the postsynapse (Figure S3C).

296 In addition to larger ribbons, at higher concentrations of Ru360 (10  $\mu$ M) we also  
297 observed an increase in cytoplasmic, non-synaptic Ribeye aggregates (Figure 5F, G). Previous  
298 work in zebrafish reported both larger ribbons and cytoplasmic aggregates of Ribeye in  $\text{Ca}_v1.3a$ -  
299 deficient hair cells (Sheets et al., 2011a). These parallel phenotypes indicate that spontaneous  
300 presynaptic  $\text{Ca}^{2+}$  influx and mito- $\text{Ca}^{2+}$  uptake may couple to shape ribbon formation. Our results  
301 suggest that during development, spontaneous  $\text{Ca}^{2+}$  entry through both  $\text{Ca}_v1.3$  and MCU  
302 channels continuously regulate ribbon formation; blocking either channel increases Ribeye  
303 aggregation and ribbon size.

304

### 305 **MCU and $\text{Ca}_v1.3$ channel activities regulate subcellular $\text{Ca}^{2+}$ homeostasis**

306 Our results indicate that spontaneous  $\text{Ca}^{2+}$  influx through  $\text{Ca}_v1.3$  channels and  
307 subsequent loading of  $\text{Ca}^{2+}$  into mitochondria regulates ribbon formation in developing hair  
308 cells. But how do these two  $\text{Ca}^{2+}$  signals converge to regulate ribbon formation? It is possible  
309 that mitochondria could buffer  $\text{Ca}^{2+}$  during spontaneous presynaptic activity and function to  
310 decrease resting levels of cytosolic  $\text{Ca}^{2+}$  (cyto- $\text{Ca}^{2+}$ ); cyto- $\text{Ca}^{2+}$  levels could be a signal that  
311 regulates ribbon formation. To examine resting cyto- $\text{Ca}^{2+}$  levels in hair cells, we examined the  
312 fluorescence signal change of the cytosolic  $\text{Ca}^{2+}$  indicator RGECO1 (CytoRGECO1) before and  
313 after a 30-min pharmacological manipulation of  $\text{Ca}_v1.3$  or MCU channels (Figure 6A-C).

314 We observed that treatment with the  $\text{Ca}_v1.3$  channel antagonist isradipine and agonist  
315 Bay K8644 decreased and increased resting CytoRGECO1 fluorescence respectively (Figure 6B).  
316 However, treatment with MCU blocker Ru360 did not significantly shift resting CytoRGECO1  
317 fluorescence levels (Figure 6B). Similar results with Ru360 were observed in developing and  
318 mature hair cells (Figure 6B-C). These data suggest that, unlike  $\text{Ca}_v1.3$  channel function, MCU  
319 function and associated mito- $\text{Ca}^{2+}$  uptake does not play a critical role in buffering steady state  
320 cyto- $\text{Ca}^{2+}$  levels.

321 Alternatively, it is possible that rather than impacting cyto- $\text{Ca}^{2+}$  levels, both  $\text{Ca}_v1.3$  and  
322 MCU activity are required to load and maintain  $\text{Ca}^{2+}$  levels within the mitochondria. In this  
323 scenario, mito- $\text{Ca}^{2+}$  levels could be a signal that regulates ribbon formation. To test this  
324 possibility, we used MitoGCaMP3 to examine resting mito- $\text{Ca}^{2+}$  levels before and after

325 modulating Cav1.3 or MCU channel function (Figure 6D-F). We observed that blocking Cav1.3  
326 channels with isradipine or the MCU with Ru360 decreased resting MitoGCaMP3 fluorescence  
327 (Figure 6E-F). Conversely, Cav1.3 channel agonist Bay K8644 increased resting MitoGCaMP3  
328 fluorescence (Figure 6E). These results were consistent in developing and mature hair cells  
329 (Figure 6E-F). Our resting MitoGCaMP3 measurements indicate that the effects of Cav1.3  
330 channel and MCU activity converge in to regulate mito-Ca<sup>2+</sup> levels. When either of these  
331 channels are blocked, the resting levels of mito-Ca<sup>2+</sup> are decreased. Therefore, if presynaptic  
332 Ca<sup>2+</sup> influx and mito-Ca<sup>2+</sup> regulate ribbon formation through a similar mechanism, they may act  
333 through mito- rather than cyto-Ca<sup>2+</sup> homeostasis.

334

### 335 **Mito-Ca<sup>2+</sup> levels regulate NAD(H) redox in developing hair cells**

336 If mito-Ca<sup>2+</sup> levels signal to regulate ribbon formation, how is this signal transmitted  
337 from the mitochondria to the ribbon? An ideal candidate is via NAD(H) homeostasis. Ribeye  
338 protein, the main component of ribbons contains a putative NAD(H) binding site. Because  
339 mitochondria regulate NAD(H) redox homeostasis (Jensen-Smith et al., 2012) we reasoned that  
340 there may be a relationship between mito-Ca<sup>2+</sup> levels, NAD(H) redox and ribbon formation.

341 To examine NAD(H) redox, we created a stable transgenic line expressing Rex-YFP, a  
342 fluorescent NAD<sup>+</sup>/NADH ratio biosensor in hair cells (Figure 6G). We verified the function of the  
343 Rex-YFP biosensor in our *in vivo* system by exogenously applying NAD<sup>+</sup> or NADH for 30 min. We  
344 found that incubations with 100 μM NAD<sup>+</sup> increased while 5 mM NADH decreased Rex-YFP  
345 fluorescence; these intensity changes are consistent with an increase and decrease in the  
346 NAD<sup>+</sup>/NADH ratio respectively (Figure 6H). Next, we examined if Cav1.3 and MCU channel  
347 activities impact the NAD<sup>+</sup>/NADH ratio. We found that 30-min treatments with either Cav1.3 or  
348 MCU channel antagonist increased the NAD<sup>+</sup>/NADH ratio (increased Rex-YFP fluorescence) in  
349 developing hair cells (Figure 6H). Interestingly, similar 30-min treatments did not alter Rex-YFP  
350 fluorescence in mature hair cells (Figure 6I). Together, our baseline MitoGCaMP3 and Rex-YFP  
351 measurements indicate that during development, Cav1.3 and MCU channel activities normally  
352 function to increase mito-Ca<sup>2+</sup> and decrease the NAD<sup>+</sup>/NADH ratio. Overall, this work provides  
353 strong evidence that links NAD(H) redox and mito-Ca<sup>2+</sup> with ribbon formation.

354

### 355 **NAD<sup>+</sup> and NADH directly influence ribbon formation**

356 Our Rex-YFP measurements suggest that spontaneous Cav1.3 and MCU Ca<sup>2+</sup> activities  
357 normally function to decrease the NAD<sup>+</sup>/NADH ratio; furthermore, this activity may function to  
358 restrict ribbon formation. Conversely, blocking these activities increases the NAD<sup>+</sup>/NADH ratio  
359 and may increase ribbon formation. If the NAD<sup>+</sup>/NADH ratio is an intermediate step between  
360 Cav1.3 and MCU channel activities and ribbon formation, we predicted that more NAD<sup>+</sup> or  
361 NADH would increase or decrease ribbon formation respectively. To test this prediction, we  
362 treated developing hair cells with exogenous NAD<sup>+</sup> or NADH.

363 After a 1-hr treatment with 100 μM NAD<sup>+</sup>, we found that the ribbons in developing hair  
364 cells were significantly larger compared to controls (Figure 7A-B, E). In contrast, after a 1-hr  
365 treatment with 5 mM NADH, ribbons were significantly smaller compared to controls (Figure  
366 7A, C, E). Neither exogenous NAD<sup>+</sup> nor NADH were able to alter ribbon size in mature hair cells  
367 (Figure 7F-H, J). These concentrations of NAD<sup>+</sup> and NADH altered neither the number of  
368 synapses per hair cell nor postsynapse size in developing or mature hair cells (Figure 3D, I,  
369 Figure S3B, D). These results suggest that in developing hair cells, NAD<sup>+</sup> promotes while NADH  
370 inhibits Ribeye-Ribeye interactions or Ribeye localization to the ribbon. Overall these results  
371 support the idea that during development, the levels of NAD<sup>+</sup> and NADH can directly regulate  
372 ribbon formation *in vivo*.

373

### 374 **Discussion**

375 In this study, we determined in a physiological setting how mito-Ca<sup>2+</sup> influences hair-cell  
376 presynapse function and formation. In mature hair cells, evoked Cav1.3-channel Ca<sup>2+</sup> influx  
377 drives Ca<sup>2+</sup> into mitochondria. Evoked mito-Ca<sup>2+</sup> uptake is important to sustain presynaptic Ca<sup>2+</sup>  
378 responses and maintain synapse integrity (Figure 8B). During development, spontaneous Cav1.3  
379 channel Ca<sup>2+</sup> influx also drives Ca<sup>2+</sup> into mitochondria. Elevated mito-Ca<sup>2+</sup> levels rapidly lower  
380 the NAD<sup>+</sup>/NADH ratio and downregulate ribbon formation (Figure 8A). Furthermore, during  
381 development, NAD<sup>+</sup> and NADH can directly increase and decrease ribbon formation

382 respectively. Our study reveals an intriguing mechanism that couples presynaptic activity with  
383 mito-Ca<sup>2+</sup> to regulate the function and formation of a presynaptic structure.

384

### 385 **Functional significance of ribbon size**

386 Our work outlines how presynaptic activity controls the formation and ultimately the  
387 size of ribbons. When either presynaptic Ca<sup>2+</sup> influx or mito-Ca<sup>2+</sup> uptake was perturbed, ribbons  
388 were significantly larger (Figure 5A-C, E; [Sheets et al., 2012](#)). But why regulate ribbon size?

389 Previous work has reported variations in ribbon size and shape among hair-cell types  
390 and species (Moser et al., 2006). Although ribbon morphology is predicted to impact synapse  
391 function, the functional consequence of presynapse structure on function has primarily been  
392 explored in the auditory inner hair cells of mice. In these auditory hair cells, studies have  
393 identified two distinct populations of ribbon synapses that spatially segregate within each cell  
394 (Kalluri and Monges-Hernandez, 2017; Liberman and Liberman, 2016; Liberman et al., 2011; Yin  
395 et al., 2014; Zhang et al., 2018a). Structurally, one population has smaller ribbons, while the  
396 other population has significantly larger ribbons. Functionally, compared to smaller ribbons,  
397 larger ribbons are associated with afferent fibers with less spontaneous activity and higher  
398 thresholds of activation ([Furman et al., 2013](#); [Kalluri and Monges-Hernandez, 2017](#); [Liberman et al., 2011, 2015, 1990](#); [Merchan-Perez and Liberman, 1996](#); [Song et al., 2016](#); [Yin et al., 2014](#)).

400 Overall, the combined use of these two types of ribbon synapse is thought to increase the  
401 range of sensitivities for each individual auditory hair cell (Costalupes et al., 1984; Ohn et al.,  
402 2016). Interestingly, in mice these two populations of ribbons can be distinguished structurally  
403 just after the onset of hearing (Liberman and Liberman, 2016). This timing suggests that similar  
404 to our data (Figure 4-5), activity during development may help determine ribbon size.

405 Previous work in the zebrafish-lateral line has also examined how ribbon size impacts  
406 synapse function (Sheets et al., 2017). This work overexpressed Ribeye in zebrafish-hair cells to  
407 dramatically enlarge ribbons. Functionally, compared to controls, hair cells with enlarged  
408 ribbons were associated with afferent neurons with lower spontaneous activity (Sheets et al.,  
409 2017). Furthermore, the onset encoding, or the timing of the first afferent spike upon  
410 stimulation, was significantly delayed in hair cells with enlarged ribbons. Together, both studies

411 in zebrafish and mouse indicate that ribbon size can impact the functional properties of the  
412 synapse. Based on these studies, we predict that the alterations to ribbon size we observed in  
413 our current study would impact functional properties of the synapse in a similar manner. For  
414 example, pharmacological treatments that enlarge ribbons (Figure 5: MCU channel block;  
415 Figure 7: exogenous NAD<sup>+</sup>) would also lower spontaneous spiking in afferents and delay onset  
416 encoding.

417

### 418 **Ribeye and CtBP localization at synapses**

419 In this study, we found that NAD(H) redox state had a dramatic effect on ribbon  
420 formation. NAD<sup>+</sup> promotes, while NADH reduces ribbon formation (Figure 7). The main  
421 component of ribbons is Ribeye. Ribeye has two domains, a unique A domain and a B domain  
422 that contains an NAD(H) binding domain (Schmitz et al., 2000a). *In vitro* work on isolated A and  
423 B domains has shown that both NAD<sup>+</sup> and NADH can affect interactions between A and B  
424 domains as well as B-domain interactions (Magupalli et al., 2008). In the context of ribbons, the  
425 B domain has been shown to concentrate at the interface between the ribbon and the  
426 membrane opposing the postsynapse (Sheets et al., 2014). Therefore, promoting B domain  
427 homodimerization may act to seed larger ribbons at the presynapse. In this scenario, NAD<sup>+</sup> and  
428 NADH could increase and decrease B domain homodimerization to impact ribbon formation.  
429 Because we also saw an increase in cytoplasmic Ribeye aggregates after MCU block (Figure 5F-  
430 G) it is alternatively possible that NAD<sup>+</sup> and NADH could impact interactions between A and B  
431 domains to more broadly impact Ribeye interactions and accumulation.

432 Regardless of the exact mechanism, the effect of presynaptic activity and related  
433 changes in NAD(H) redox homeostasis may extend beyond the sensory ribbon synapse. Ribeye  
434 is a splice variant of the transcriptional co-repressor CtBP2 (Schmitz et al., 2000b). While the A  
435 domain is unique to Ribeye, the B domain is nearly identical to CtBP2 minus the nuclear  
436 localization sequence (NLS) (Hübler et al., 2012). In vertebrates, the CtBP family also includes  
437 CtBP1 (Chinnadurai, 2007). CtBP proteins are expressed in both hair cells and the nervous  
438 system, and there is evidence that both CtBP1 and CtBP2 may act as scaffolds at neuronal  
439 synapses (Hübler et al., 2012; tom Dieck et al., 2005). Interestingly, in cultured neurons, it has

440 been shown that synaptic activity is associated with both an increase in CtBP1 localization at  
441 the presynapse, as well as a decrease in the NAD<sup>+</sup>/NADH ratio (Ivanova et al., 2015). In our *in*  
442 *vivo* study, we also found that the NAD<sup>+</sup>/NADH ratio was lower in developing hair cells with  
443 presynaptic activity (Figure 6H). But in contrast to *in vitro* work on CtBP1 in cultured neurons,  
444 we found that Ribeye localization to the presynapse and ribbon size was reduced when the  
445 NAD<sup>+</sup>/NADH ratio was lowered (Figure 7A-C). It is unclear why presynaptic activity regulates  
446 Ribeye localization differently from that of CtBP1. Ribeye and CtBP1 behavior may differ due to  
447 the divergent function of their N-terminal domains. Synaptic localization may also be influenced  
448 by external factors, such as the cell type in which the synapse operates, whether the study is  
449 performed *in vitro* or *in vivo*, as well as the maturity of the synapse. Overall, both studies  
450 demonstrate that CtBP1 and Ribeye localization to the presynapse can be influenced by  
451 synaptic activity and NAD(H) redox state.

452

#### 453 **Role of evoked mito-Ca<sup>2+</sup> uptake in mature hair cells**

454 Studies in various neuronal subtypes have demonstrated that mitochondria play  
455 multiple roles to maintain neurotransmission including ATP production, Ca<sup>2+</sup> buffering and  
456 signaling, and neurotransmitter synthesis. (reviewed in Kann and Kovács, 2007; Vos et al.,  
457 2010). Our study found that in mature zebrafish-hair cells, even partially blocking evoked mito-  
458 Ca<sup>2+</sup> uptake can impair presynaptic Ca<sup>2+</sup> influx during sustained stimuli (Figure 2E-F). But how  
459 does mito-Ca<sup>2+</sup> uptake impact presynaptic Ca<sup>2+</sup> activity? Although mito-Ca<sup>2+</sup> uptake could  
460 function to buffer cyto-Ca<sup>2+</sup> to maintain presynaptic function, our current work indicates that  
461 blocking mito-Ca<sup>2+</sup> uptake does not raise cytosolic Ca<sup>2+</sup> levels (Figure 6A-C). Therefore mito-Ca<sup>2+</sup>  
462 uptake may not be required to buffer or clear Ca<sup>2+</sup> from the cytosol during steady-state.  
463 Alternatively, mito-Ca<sup>2+</sup> uptake could buffer Ca<sup>2+</sup> locally during presynaptic activity to prevent  
464 Ca<sup>2+</sup>-dependent inactivation of Cav1.3 channels. In hair cells, Cav1.3 channels exhibit reduced  
465 Ca<sup>2+</sup> dependent inactivation (Koschak et al., 2001; Platzer et al., 2000; Song et al., 2003; Xu and  
466 Lipscombe, 2001). This reduction has been proposed to be important to transmit sustained  
467 sensory stimulation (Kollmar et al., 1997). Perhaps local removal of Ca<sup>2+</sup> into the mitochondria  
468 during presynaptic activity is another mechanism in place to sustain neurotransmission.



469 Alternatively, if mito- $\text{Ca}^{2+}$  uptake does not buffer  $\text{Ca}^{2+}$ , it could be critical to produce ATP for  
470 other cellular tasks to maintain neurotransmission. Additional work is necessary to understand  
471 how evoked mito- $\text{Ca}^{2+}$  uptake functions to sustain presynaptic  $\text{Ca}^{2+}$  influx in mature-zebrafish  
472 hair cells.

473 In addition to innate cellular roles, in neurons and in hair cells, mito- $\text{Ca}^{2+}$  loading is also  
474 associated with pathological processes such as reactive oxygen species (ROS) production, cell  
475 death and synapse loss (Cai and Tammineni, 2016; Court and Coleman, 2012; DiMauro and  
476 Schon, 2008; Esterberg et al., 2013, 2014; Sheng and Cai, 2012). Interestingly, recent work has  
477 demonstrated that noise-induced hearing loss is associated with measurable changes in ribbon  
478 morphology and synapse number (Jensen et al., 2015; Kujawa and Liberman, 2009; Liberman et  
479 al., 2015). Work studying this type of hearing loss has shown that auditory inner hair cells in the  
480 high frequency region of the mouse cochlea have enlarged ribbons immediately after noise,  
481 followed later by synapse loss (Liberman et al., 2015). This pathology is reminiscent of our 1-hr  
482 pharmacological treatments that completely block the MCU in mature zebrafish hair cells  
483 (Figure 3E-F). After this treatment, we observed a reduction in the number hair cells and  
484 synapses, and an increase in ribbon size. Surprisingly, these same treatments applied to  
485 developing hair cells increased ribbon size but did not reduce cell or synapse number (Figure  
486 5D). Recent work has suggested that younger hair cells may be more resilient to ototoxins,  
487 perhaps because they have not yet accumulated an excess of mitochondria oxidation (Pickett et  
488 al., 2018). This could explain why complete MCU block is not pathological to developing hair  
489 cells. Overall these studies, along with our own data indicate that in mature hair cells, the  
490 mitochondria and the MCU may be associated with pathological processes associated with  
491 ototoxins and noise-exposure.

492 In further support of this idea, recent work in mice has investigated the role of the MCU  
493 in noise-related hearing loss (Wang et al., 2018). This work demonstrated that pharmacological  
494 block or a loss of function mutation in MCU protected against synapse loss in auditory inner  
495 hair cells after noise exposure. Although this result is counter to our observed results where  
496 complete MCU block reduces synapse number (Figure 3E), it highlights an association between  
497 mito- $\text{Ca}^{2+}$ , noise exposure and synapse integrity. It is possible that these differences can be

498 explained by transitory versus chronic alterations in mito- $\text{Ca}^{2+}$  homeostasis. These differences  
499 may be resolved by studying the hair cells in a zebrafish MCU knock out. In the future it will be  
500 interesting to examine both mito- $\text{Ca}^{2+}$  uptake and ribbon morphology during other pathological  
501 conditions that enlarge ribbons such as noise exposure, ototoxicity and aging.

502

### 503 **Role of spontaneous mito- $\text{Ca}^{2+}$ uptake in developing hair cells**

504 Although mitochondria have been studied in the context of cellular function and cell  
505 death, relatively few studies have examined the role mitochondria play in development. We  
506 found that mitochondria spontaneously take up  $\text{Ca}^{2+}$  during hair-cell development (Figure 4B-  
507 C). Although studies in mammalian hair cells have demonstrated that there are spontaneous  
508 rises in presynaptic  $\text{Ca}^{2+}$  during development (Marcotti et al., 2003; Tritsch et al., 2010), these  
509  $\text{Ca}^{2+}$  signals have not been reported in zebrafish hair cells. Our work highlights the mitochondria  
510 as a downstream signaling organelle that couples presynaptic- $\text{Ca}^{2+}$  influx to ribbon formation  
511 (Figure 8A). In the future, zebrafish will be a useful model to further explore the origin and role  
512 of these spontaneous  $\text{Ca}^{2+}$  signals.

513 In our study, we also found that altering baseline mito- $\text{Ca}^{2+}$  levels rapidly influenced the  
514  $\text{NAD}^+/\text{NADH}$  ratio and altered ribbon size in developing hair cells (Figure 5, 6, 7). However, in  
515 mature hair cells, while alterations to mito- $\text{Ca}^{2+}$  levels increased ribbon size they did not  
516 influence  $\text{NAD(H)}$  redox (Figure 6I). One reason why  $\text{NAD(H)}$  redox does not change in mature  
517 hair cells is that ribbon enlargement could be occurring through a different mechanism. For  
518 example, ribbon enlargement could be a pathological byproduct of synapse loss (Figure 3E). In  
519 mature hair cells, after MCU block it is possible that individual ribbons are not enlarging, but  
520 instead ribbons are merging together as synapses are lost. In the future live imaging studies will  
521 help resolve whether there are different mechanisms underlying ribbon enlargement in mature  
522 and developing hair cells.

523 Overall this study has demonstrated the zebrafish-lateral line is a valuable system to  
524 study the interplay between the mitochondria, and synapse function, development and  
525 integrity. In the future it will be exciting to expand this research to explore how evoked and

526 spontaneous mito-Ca<sup>2+</sup> influx are impacted by pathological treatments such as age, noise and  
527 ototoxins.

528

## 529 **Method Details**

530

### 531 *Zebrafish husbandry and genetics*

532 Adult *Danio rerio* (zebrafish) were maintained under standard conditions. Larvae 2 to 6  
533 days post-fertilization (dpf) were maintained in E3 embryo medium (in mM: 5 NaCl, 0.17 KCl,  
534 0.33 CaCl<sub>2</sub> and 0.33 MgSO<sub>4</sub>, buffered in HEPES pH 7.2) at 28°C. All husbandry and experiments  
535 were approved by the NIH Animal Care and Use program under protocol #1362-13. Transgenic  
536 zebrafish lines used in this study include: *Tg(myo6b:GCaMP6s-CAAX)<sup>idc1</sup>* (Jiang et al., 2017b),  
537 *Tg(myo6b:RGECO1)<sup>vo10Tg</sup>* (Maeda et al., 2014), *Tg(myo6b:GCaMP3)<sup>w78Tg</sup>* (Esterberg et al., 2013),  
538 *Tg(myo6b:mitoGCaMP3)<sup>w119Tg</sup>* (Esterberg et al., 2014), and *Tg(myo6b:ribeye a-tagRFP)<sup>idc11Tg</sup>*  
539 (Sheets, 2017). Experiments were performed using Tübingen or TL wildtype strains.

540

### 541 *Cloning and Transgenic Fish Production*

542 To create transgenic fish, plasmid construction was based on the tol2/Gateway zebrafish  
543 kit developed by the lab of Chi-Bin Chien at the University of Utah (Kwan et al., 2007). These  
544 methods were used to create *Tg(myo6b:mitoRGECO1)<sup>idc12Tg</sup>* and *Tg(myo6b:Rex-YFP)<sup>idc13Tg</sup>*  
545 transgenic lines. Gateway cloning was used to clone *Rex-YFP* (Bilan et al., 2014) and  
546 *mitoRGECO1* into the middle entry vector pDONR221. For mitochondrial matrix targeting, the  
547 sequence of cytochrome C oxidase subunit VIII (Rizzuto et al., 1989) was added to the N-  
548 terminus of RGECO1. Vectors p3E-polyA (Kwan et al., 2007) and pDestTol2CG2 (Kwan et al.,  
549 2007) were recombined with p5E *myosinVlb* (*myo6b*) (Kindt et al., 2012) and our engineered  
550 plasmids to create the following constructs: *myo6b:REX-YFP*, and *myo6b:mitoRGECO1*. To  
551 generate transgenic fish, DNA clones (25-50 ng/μl) were injected along with *tol2* transposase  
552 mRNA (25-50 ng/μl) into zebrafish embryos at the single-cell stage.

553

### 554 *Pharmacological treatment of larvae for immunohistochemistry*

555 For immunohistological studies, zebrafish larvae were exposed to compounds diluted in  
556 E3 with 0.1% DMSO (isradipine, Bay K8644, NAD<sup>+</sup> (Sigma-Aldrich, St. Louis, MO), Ru360  
557 (Millipore, Burlington, MA)) or Tris-HCl (NADH (Cayman Chemical, Ann Arbor, MI)) for 30 min or  
558 1 hr at the concentrations indicated. E3 with 0.1% DMSO or Tris-HCl were used as control  
559 solutions. In solution at pH 7.0-7.3, NADH oxidizes into NAD<sup>+</sup> by exposure to dissolved oxygen.  
560 To mitigate this, NADH was dissolved immediately before use, and was exchanged with a  
561 freshly dissolved NADH solution every half hour. Dosages of isradipine, Ru360, NAD<sup>+</sup> and NADH  
562 did not confer excessive hair-cell death or synapse loss unless stated. After exposure to the  
563 compounds, larvae were quickly sedated on ice and transferred to fixative.

564

#### 565 *In vivo imaging of baseline Ca<sup>2+</sup> and NAD(H) redox*

566 To prepare larvae for imaging, larvae were immobilized as previously described (Kindt et  
567 al, 2012). Briefly, larvae were anesthetized with tricaine (0.03%) and pinned to a chamber lined  
568 with Sylgard 184 Silicone Elastomer (Dow Corning, Midland, MI). Larvae were injected with 125  
569  $\mu$ M  $\alpha$ -bungarotoxin (Tocris, Bristol, UK) into the pericardial cavity to paralyze. Tricaine was  
570 rinsed off the larvae with E3.

571 For baseline measurements of Rex-YFP and cytoRGECO1 fluorescence, larvae were  
572 imaged using an upright Nikon ECLIPSE Ni-E motorized microscope (Nikon Inc., Tokyo, Japan) in  
573 widefield mode with a Nikon 60x 1.0 NA CFI Fluor water-immersion objective, 480/30 nm  
574 excitation and 535/40 nm emission filter set or 520/35 nm excitation and 593/40 emission filter  
575 set, and an ORCA-D2 camera (Hamamatsu Photonics K.K., Hamamatsu City, Japan). Acquisitions  
576 were taken at 5 Hz, in 15 plane Z-stacks every 2  $\mu$ m. For baseline measurements of  
577 MitoGCaMP3, larvae were imaged using a Bruker Swept-field confocal microscope (Bruker Inc.,  
578 Billerica, MA), with a Nikon CFI Fluor 60x 1.0 NA water immersion objective. A Rolera EM-C2  
579 CCD camera (QImaging, Surrey, Canada) was used to detect signals. Acquisitions were taken  
580 using a 70  $\mu$ m slit at a frame rate of 10 Hz, in 26 plane Z-stacks every 1  $\mu$ m. MitoGCaMP3  
581 baseline intensity varied dramatically in controls between timepoints. To offset this variability,  
582 we acquired and averaged the intensity of 4 Z-stacks per time point. For all baseline  
583 measurements transgenic larvae were first imaged in E3 with 0.1% DMSO or 0.1% Tris-HCl as

584 appropriate. Then larvae were exposed to pharmacological agents for 30 minutes and a second  
585 acquisition was taken. Any neuromasts with cell death after pharmacological treatment were  
586 excluded from our analyses.

587

#### 588 *In vivo imaging of evoked Ca<sup>2+</sup> signals*

589 To measure evoked Ca<sup>2+</sup> signals in hair-cells, larvae were prepared in a similar manner  
590 as described for baseline measurements. After  $\alpha$ -bungarotoxin paralysis, larvae were immersed  
591 in neuronal buffer solution (in mM: 140 NaCl, 2 KCl, 2 CaCl<sub>2</sub>, 1 MgCl<sub>2</sub> and 10 HEPES, pH 7.3).  
592 Evoked Ca<sup>2+</sup> measurements were acquired using the Bruker Swept-field confocal system  
593 described above. To stimulate lateral-line hair cells, a fluid-jet was used as previously described  
594 to deliver a saturating stimulus (Lukasz and Kindt, 2018).

595 To measure presynaptic GCaMP6sCAAX signals at ribbons, images were acquired with 1  
596 x 1 binning with a 35  $\mu$ m slit at 50 Hz in a single plane containing presynaptic ribbons. Ribbons  
597 were marked in live hair cells using the *Tg(myo6b:ribeye a-tagRFP)<sup>idc11Tg</sup>* transgenic line (Figure  
598 S2). Ribbons were located relative to GCaMP6s signals by acquiring a Z-stack of 5 planes 1  $\mu$ m.  
599 To correlate presynaptic GCaMP6sCAAX signals with mitoRGECO1 signals in hair cells, 2-color  
600 imaging was performed. Images were acquired in a single plane with 2 x 2 binning at 10 Hz.  
601 MitoGCaMP3 signals were acquired in Z-stacks of 5 planes 1  $\mu$ m apart at 2 x 2 binning. High  
602 speed imaging along the Z-axis was accomplished by using a piezoelectric motor (PICMA P-  
603 882.11-888.11 series, Physik Instrumente GmbH, Karlsruhe, Germany) attached to the objective  
604 to allow rapid imaging at a 50 Hz frame rate yielding a 10 Hz volume rate. For pharmacological  
605 treatment, acquisitions were made prior to drug treatment and after a 20-min incubation in the  
606 pharmacological agent. Any neuromasts with cell death after pharmacological treatment were  
607 excluded from our analyses.

608

#### 609 *In vivo imaging of spontaneous Ca<sup>2+</sup> signals*

610 To measure spontaneous Ca<sup>2+</sup> signals in hair-cells, larvae were prepared in a similar  
611 manner as described for evoked Ca<sup>2+</sup> measurements. Spontaneous Ca<sup>2+</sup> measurements were  
612 acquired using the Bruker Swept-field confocal system described above. To measure

613 spontaneous presynaptic GCaMP6sCAAX signals, images were acquired with 2 x 2 binning with  
614 a 70  $\mu\text{m}$  slit at 0.33 Hz in a single plane for 900 s. For acquisition of two-color spontaneous  
615 presynaptic GCaMP6sCAAX and mitoRGECO1 signals images were acquired with 2 x 2 binning  
616 with a 70  $\mu\text{m}$  slit at 0.2 Hz in a single plane for 900 s.

617

#### 618 *Electron microscopy*

619 Larvae were prepared for electron microscopy as described previously (Sheets, 2017).  
620 Transverse serial sections (~60 nm thin sections) were used to section through neuromasts.  
621 Samples were imaged on a JEOL JEM-2100 electron microscope (JEOL Inc., Tokyo, Japan). The  
622 distance from the edge of a ribbon density to the edge of the nearest mitochondria was  
623 measured (n= 17 ribbons). In 74 % of ribbons, a mitochondrion could be clearly identified within  
624 1  $\mu\text{m}$  of a ribbon in a single section (17 out of 21 ribbons). All distances and perimeters were  
625 measured in FIJI (Schindelin et al., 2012).

626

#### 627 *Immunofluorescence staining and Airyscan imaging*

628 Whole larvae were fixed with 4% paraformaldehyde in PBS at 4°C for 3.5-4 hr as  
629 previously described (Zhang et al., 2018b). Fixative was washed out with 0.01% Tween in PBS  
630 (PBST) in 4 washes, 5 min each. Larvae were then washed for 5 min with H<sub>2</sub>O. The H<sub>2</sub>O was  
631 thoroughly removed and replaced with ice-cold acetone and placed at -20°C for 3 min for 3 dpf  
632 and 5 min for 5 dpf larvae, followed by a 5 min H<sub>2</sub>O wash. The larvae were then washed for 4 x  
633 5 min in PBST, then incubated in block overnight at 4°C in blocking solution (2% goat serum, 1 %  
634 bovine serum albumin, 2% fish skin gelatin in PBST). Primary and secondary antibodies were  
635 diluted in blocking solution. Primary antibodies and their respective dilution are: Ribbon label:  
636 Mouse anti-Ribeye b IgG2a, 1:10,000 (Sheets et al., 2011b); PSD label: Mouse anti-pan-MAGUK  
637 IgG1 #75-029, 1:500 (UC Davis/NIH NeuroMab Facility, Davis, CA); Hair cell label: Rabbit anti-  
638 Myosin VIIa, 1:1000 (Proteus BioSciences Inc., Ramona, CA). Larvae were incubated in primary  
639 antibody solution for 2 hr at room temperature. After 4 x 5 min washes in PBST to remove the  
640 primary antibodies, diluted secondary antibodies were added in and samples were incubated  
641 for 2 hr at room temperature. Secondary antibodies and their respective dilution are: goat anti-

642 mouse IgG2a, Alexa Fluor 488, 1:1000; goat anti-rabbit IgG (H+L) Alexa Fluor 568, 1:1000; goat  
643 anti-mouse IgG1 Alexa Fluor 647, 1:1000 (Thermo Fisher Scientific, Waltham, MA). Secondary  
644 antibody was washed out with PBST for 3 x 5 min, followed by a 5 min wash with H<sub>2</sub>O. Larvae  
645 were mounted on glass slides with Prolong Gold Antifade Reagent (Invitrogen, Carlsbad, CA)  
646 using No. 1.5 coverslips.

647 Prior to Airyscan imaging, live samples were immobilized in 2 % low-melt agarose in  
648 tricaine (0.03%) in cover-glass bottomed dishes. Live and fixed samples were imaged on an  
649 inverted Zeiss LSM 780 laser-scanning confocal microscope with an Airyscan attachment (Carl  
650 Zeiss AG, Oberkochen, Germany) using an 63x 1.4 NA oil objective lens. The median ( $\pm$  median  
651 absolute deviation) lateral and axial resolution of the system was measured at  $198 \pm 7.5$  nm  
652 and  $913 \pm 50$  nm (full-width at half-maximum), respectively. The acquisition parameters were  
653 adjusted using the control sample such that pixels for each channel reach at least 1/10 of the  
654 dynamic range. The Airyscan Z-stacks were processed with Zeiss Zen Black software v2.1 using  
655 3D filter setting of 7.0. Experiments were imaged with the same acquisition settings to maintain  
656 consistency between comparisons.

657

## 658 **Quantification and Statistical Analysis**

### 659 *Analysis of Ca<sup>2+</sup> and NAD(H) signals, processing, and quantification*

660 To quantify changes in baseline Ca<sup>2+</sup> and NAD(H) homeostasis, images were processed in  
661 FIJI. For our measurements we quantified the fluorescence in the basal-most 8  $\mu$ m (4 planes) to  
662 avoid overlap between cells. The basal planes were max Z-projected, and a 24.0 $\mu$ m (Rex-YFP  
663 and RGECO1) or 26.8  $\mu$ m (MitoGCaMP3) circular region of interest (ROI) was drawn over the  
664 neuromast to make an intensity measurement. To correct for photobleaching, a set of mock-  
665 treated control neuromasts were imaged during every trial. These mock treatments were used  
666 to normalize the post-treatment intensity values.

667 To quantify the magnitude of evoked changes in Ca<sup>2+</sup>, fluorescent images were  
668 processed in FIJI. Images in each time series were aligned using Stackreg (Thevenaz et al.,  
669 1998). For evoked MitoRGECO1, MitoGCaMP3, CytoGCaMP3 and two-color GCaMP6sCAAX and  
670 MitoRGECO1 signals, Z-stack were max z-projected, and a 5  $\mu$ m diameter circular ROI was

671 drawn over each hair cell. For ribbon-localized measurements, GCaMP6sCAAX signals were  
672 measured within a 1.34  $\mu\text{m}$  round ROIs at individual ribbons, and intensity of multiple ROI  
673 within a cell were averaged. Cells with presynaptic  $\text{Ca}^{2+}$  activity is defined by max  $\Delta\text{F}/\text{F}$  of  $> 0.05$   
674 for MitoRGECO1 and MitoGCaMP3, and max  $\Delta\text{F}/\text{F} > 0.25$  for GCaMP6sCAAX for a 2-s  
675 stimulation.

676 To quantify the average magnitude and frequency of spontaneous  $\text{Ca}^{2+}$  changes in  
677 GCaMP6sCAAX signals, images were processed in Matlab R2014b (Mathworks, Natick, MA) and  
678 FIJI. First, images in each time series were aligned using Stackreg (Thevenaz et al., 1998). To  
679 measure the average magnitude during the 900 s GCaMP6sCAAX image acquisition, a 5  $\mu\text{m}$   
680 diameter circular ROI was drawn over each hair cell and a raw intensity value was obtained  
681 from each time point. Then the raw traces were bleach corrected. Next, the corrected intensity  
682 values were normalized as  $\Delta\text{F}/\text{F}_0$ .  $\text{F}_0$  is defined as the bottom 15<sup>th</sup> percentile of fluorescence  
683 values (Babola et al., 2018). Then, values of  $\Delta\text{F}/\text{F}_0$  of less than 10 % were removed. These values  
684 were considered to be noise and our threshold value for a true signal. A 10 % threshold was  
685 determined by imaging spontaneous GCaMP6CAAX signals in the presence of isradipine where  
686 no signals were observed (Figure S4). The averaged magnitude of spontaneous activity per cell  
687 was obtained by dividing the integral/sum of GCaMP6sCAAX signals ( $\Delta\text{F}/\text{F}_0 > 10\%$ ) during the  
688 whole recording period by 300 (300 frames in 900 s). The frequency of GCaMP6sCAAX signals  
689 was defined as the average number of peaks per second during the whole recording period.

690

#### 691 *Image processing and quantification of synapse morphology*

692 To quantify synapse morphology and pairing, images were first processed in ImageJ  
693 (NIH, Bethesda, MD), and then synapses were paired using Python (Python Software  
694 Foundation, Wilmington, DE) in the Spyder Scientific Environment (MIT, Cambridge, MA). In  
695 ImageJ, each Airyscan Z-stack was background subtracted using rolling-ball subtraction. Z-stacks  
696 containing the MAGUK channel were further bandpass filtered to remove details smaller than 6  
697 px and larger than 20 px. A duplicate of the Z-stack was normalized for intensity. This duplicated  
698 Z-stack was used to identify individual ribbon and MAGUK using the Simple 3D Segmentation of  
699 ImageJ 3D Suite (Ollion et al., 2013). Local intensity maxima, identified with 3D Fast Filter, and



700 3D watershed were used to separate close-by structures. The centroid for each identified  
701 ribbon and MAGUK was obtained using 3D Manager and were used to identify complete  
702 synapses. The max Z-projection of the segmented Z-stack was used to generate a list of 2D  
703 objects as individual ROIs corresponding to each punctum. This step also included a minimum  
704 size filter, Ribeye:  $0.08 \mu\text{m}^2$ , MAGUK  $0.04 \mu\text{m}^2$ . For quantification of extrasynaptic Ribeye b  
705 puncta, the minimum size filter was not applied. The 2D puncta ROI were applied over the max  
706 Z-projection of the original Z-stack processed only with background subtraction. This step  
707 measures the intensity of the antibody label. Centroid and intensity information were exported  
708 as a CSV spreadsheet (macro is available upon request).

709 In Python, the 3D centroid coordinates for each ribbon punctum was measured against  
710 the coordinates of every post-synaptic MAGUK punctum to find the MAGUK punctum within a  
711 threshold distance. This threshold was calculated by taking the 2D area of the Ribeye and  
712 MAGUK punctum measured in the max Z-projection to calculate an approximate radius by  
713 dividing by  $\pi$  and taking the square root. The two radii were then summed to get the threshold.  
714 Puncta that were not paired were excluded from later statistical analyses of synaptic ribbon and  
715 postsynaptic MAGUK puncta. Hair cell and synapse count were confirmed manually. Hair cell  
716 counts were performed with myosin VIIa antibody label in treatments where synapse or cell  
717 numbers were reduced.

718

## 719 *Statistics*

720 Statistical analyses and data plots were performed with Prism 8 (Graphpad, San Diego,  
721 CA). Values in the text and data with error bars on graphs and in text are expressed as mean  $\pm$   
722 SEM unless indicated otherwise. All experiments were performed on a minimum of 2 animals, 6  
723 neuromasts (posterior lateral-line neuromasts L1-L4), on 2 independent days. For 3 and 5 dpf  
724 larvae each neuromast represents analysis from 8-12 hair cells; 24-36 synapses and 14-18 hair  
725 cells; 42-54 synapses respectively. All replicates are biological. Based on the variance and effect  
726 sizes reported previously and measured in this study, these numbers were adequate to provide  
727 statistical power to avoid both Type I and Type II error (Sheets et al., 2012; Zhang et al., 2018b).  
728 No animals or samples were excluded from our analyses unless control experiments failed—in

729 these cases all samples were excluded. No randomization or blinding was used for our animal  
730 studies. Where appropriate, datasets were confirmed for normality using a D'Agostino-Pearson  
731 normality test and for equal variances using a F test to compare variances. Statistical  
732 significance between two conditions was determined by either unpaired Welch's unequal  
733 variance *t*-test, a Mann-Whitney U test or a Wilcoxon matched-pairs signed-rank test as  
734 appropriate. For comparison of multiple conditions, a Brown-Forsythe or a Welch ANOVA with  
735 Games-Howell post hoc were used.

736

### 737 **Acknowledgements**

738 This work was supported by National Institute on Deafness and Other Communication  
739 Disorders Intramural Research Program Grant 1ZIADC000085-01 to K.S.K. and ZICDC000081 to  
740 R.S.P. and Y.-X.W. We would like to thank Katie Drerup, Paul Fuchs and Doris Wu for their  
741 support and thoughtful comments on the manuscript.

742

### 743 **Declaration of interests**

744 The authors declare no competing financial or non-financial interests.

745

### 746 **Author contributions**

747 Conceptualization, Methodology, Writing, H.C.W., K.S.K., Formal Analysis, H.C.W., Investigation,  
748 H.C.W., Q.X.Z., A.J.B., R.S.P., Y.-X.W., and Supervision, K.S.K.

749

### 750 **References**

751 Babola, T.A., Li, S., Gribizis, A., Lee, B.J., Issa, J.B., Wang, H.C., Crair, M.C., and Bergles, D.E.  
752 (2018). Homeostatic Control of Spontaneous Activity in the Developing Auditory System.  
753 *Neuron* 99, 511-524.e5.

754 Becker, L., Schnee, M.E., Niwa, M., Sun, W., Maxeiner, S., Talaei, S., Kachar, B., Rutherford,  
755 M.A., and Ricci, A.J. (2018). The presynaptic ribbon maintains vesicle populations at the hair cell  
756 afferent fiber synapse. *ELife Sciences* 7, e30241.

757 Billups, B., and Forsythe, I.D. (2002). Presynaptic mitochondrial calcium sequestration  
758 influences transmission at mammalian central synapses. *The Journal of Neuroscience : The*  
759 *Official Journal of the Society for Neuroscience* 22, 5840–5847.

- 760 Böttger, E.C., and Schacht, J. (2013). The mitochondrion: a perpetrator of acquired hearing loss.  
761 *Hear. Res.* *303*, 12–19.
- 762 Brandt, A., Striessnig, J., and Moser, T. (2003). CaV1.3 channels are essential for development  
763 and presynaptic activity of cochlear inner hair cells. *J. Neurosci.* *23*, 10832–10840.
- 764 Cai, Q., and Tammineni, P. (2016). Alterations in Mitochondrial Quality Control in Alzheimer’s  
765 Disease. *Front. Cell. Neurosci.* *10*.
- 766 Carafoli, E. (2011). The plasma membrane calcium pump in the hearing process: physiology and  
767 pathology. *Sci China Life Sci* *54*, 686–690.
- 768 Castellano-Muñoz, M., and Ricci, A.J. (2014). Role of intracellular calcium stores in hair-cell  
769 ribbon synapse. *Front Cell Neurosci* *8*.
- 770 Ceriani, F., Hendry, A., Jeng, J.-Y., Johnson, S.L., Stephani, F., Olt, J., Holley, M.C., Mammano, F.,  
771 Engel, J., Kros, C.J., et al. (2019). Coordinated calcium signalling in cochlear sensory and non-  
772 sensory cells refines afferent innervation of outer hair cells. *The EMBO Journal* e99839.
- 773 Chinnadurai, G. (2007). Transcriptional regulation by C-terminal binding proteins. *The*  
774 *International Journal of Biochemistry & Cell Biology* *39*, 1593–1607.
- 775 Chouhan, A.K., Zhang, J., Zinsmaier, K.E., and Macleod, G.T. (2010). Presynaptic mitochondria in  
776 functionally different motor neurons exhibit similar affinities for Ca<sup>2+</sup> but exert little influence  
777 as Ca<sup>2+</sup> buffers at nerve firing rates in situ. *The Journal of Neuroscience : The Official Journal of*  
778 *the Society for Neuroscience* *30*, 1869–1881.
- 779 Costalupes, J.A., Young, E.D., and Gibson, D.J. (1984). Effects of continuous noise backgrounds  
780 on rate response of auditory nerve fibers in cat. *Journal of Neurophysiology* *51*, 1326–1344.
- 781 Court, F.A., and Coleman, M.P. (2012). Mitochondria as a central sensor for axonal degenerative  
782 stimuli. *Trends Neurosci.* *35*, 364–372.
- 783 Devine, M.J., and Kittler, J.T. (2018). Mitochondria at the neuronal presynapse in health and  
784 disease. *Nature Reviews Neuroscience* *19*, 63–80.
- 785 DiMauro, S., and Schon, E.A. (2008). Mitochondrial Disorders in the Nervous System. *Annual*  
786 *Review of Neuroscience* *31*, 91–123.
- 787 Eckrich, T., Blum, K., Milenkovic, I., and Engel, J. (2018). Fast Ca<sup>2+</sup> Transients of Inner Hair Cells  
788 Arise Coupled and Uncoupled to Ca<sup>2+</sup> Waves of Inner Supporting Cells in the Developing Mouse  
789 Cochlea. *Front. Mol. Neurosci.* *11*.
- 790 Esterberg, R., Hailey, D.W., Coffin, A.B., Raible, D.W., and Rubel, E.W. (2013). Disruption of  
791 Intracellular Calcium Regulation Is Integral to Aminoglycoside-Induced Hair Cell Death. *Journal*  
792 *of Neuroscience* *33*, 7513–7525.

- 793 Esterberg, R., Hailey, D.W., Rubel, E.W., and Raible, D.W. (2014). ER–Mitochondrial Calcium  
794 Flow Underlies Vulnerability of Mechanosensory Hair Cells to Damage. *J Neurosci* *34*, 9703–  
795 9719.
- 796 Fischel-Ghodsian, N., Kopke, R.D., and Ge, X. (2004). Mitochondrial dysfunction in hearing loss.  
797 *Mitochondrion* *4*, 675–694.
- 798 Fjeld, C.C., Birdsong, W.T., and Goodman, R.H. (2003). Differential binding of NAD<sup>+</sup> and NADH  
799 allows the transcriptional corepressor carboxyl-terminal binding protein to serve as a metabolic  
800 sensor. *Proc. Natl. Acad. Sci. U.S.A.* *100*, 9202–9207.
- 801 Flippo, K.H., and Strack, S. (2017). Mitochondrial dynamics in neuronal injury, development and  
802 plasticity. *Journal of Cell Science* *130*, 671–681.
- 803 Furman, A.C., Kujawa, S.G., and Liberman, M.C. (2013). Noise-induced cochlear neuropathy is  
804 selective for fibers with low spontaneous rates. *J. Neurophysiol.* *110*, 577–586.
- 805 Hübler, D., Rankovic, M., Richter, K., Lazarevic, V., Altmann, W.D., Fischer, K.-D., Gundelfinger,  
806 E.D., and Fejtova, A. (2012). Differential spatial expression and subcellular localization of CtBP  
807 family members in rodent brain. *PLoS One* *7*, e39710.
- 808 Ivanova, D., Dirks, A., Montenegro-Venegas, C., Schöne, C., Altmann, W.D., Marini, C.,  
809 Frischknecht, R., Schanze, D., Zenker, M., Gundelfinger, E.D., et al. (2015). Synaptic activity  
810 controls localization and function of CtBP1 via binding to Bassoon and Piccolo. *EMBO J* *34*,  
811 1056–1077.
- 812 Jean, P., Morena, D.L. de la, Michanski, S., Tobón, L.M.J., Chakrabarti, R., Picher, M.M., Neef, J.,  
813 Jung, S., Gültas, M., Maxeiner, S., et al. (2018). The synaptic ribbon is critical for sound encoding  
814 at high rates and with temporal precision. *ELife Sciences* *7*, e29275.
- 815 Jensen, J.B., Lysaght, A.C., Liberman, M.C., Qvortrup, K., and Stankovic, K.M. (2015). Immediate  
816 and delayed cochlear neuropathy after noise exposure in pubescent mice. *PLoS One* *10*,  
817 e0125160.
- 818 Jensen-Smith, H.C., Hallworth, R., and Nichols, M.G. (2012). Gentamicin rapidly inhibits  
819 mitochondrial metabolism in high-frequency cochlear outer hair cells. *PLoS ONE* *7*, e38471.
- 820 Jiang, T., Kindt, K., and Wu, D.K. (2017a). Transcription factor Emx2 controls stereociliary bundle  
821 orientation of sensory hair cells. *ELife* *6*.
- 822 Jiang, T., Kindt, K., and Wu, D.K. (2017b). Transcription factor Emx2 controls stereociliary bundle  
823 orientation of sensory hair cells. *ELife* *6*.
- 824 Johnson, S.L., Safieddine, S., Mustapha, M., and Marcotti, W. (2019). Hair Cell Afferent  
825 Synapses: Function and Dysfunction. *Cold Spring Harb Perspect Med*.

- 826 Kalluri, R., and Monges-Hernandez, M. (2017). Spatial Gradients in the Size of Inner Hair Cell  
827 Ribbons Emerge Before the Onset of Hearing in Rats. *Journal of the Association for Research in*  
828 *Otolaryngology* 18, 399–413.
- 829 Kann, O., and Kovács, R. (2007). Mitochondria and neuronal activity. *Am. J. Physiol., Cell Physiol.*  
830 292, C641–57.
- 831 Kennedy, H.J. (2002). Intracellular calcium regulation in inner hair cells from neonatal mice. *Cell*  
832 *Calcium* 31, 127–136.
- 833 Kindt, K.S., Finch, G., and Nicolson, T. (2012). Kinocilia mediate mechanosensitivity in  
834 developing zebrafish hair cells. *Developmental Cell* 23, 329–341.
- 835 Kokotas, H., Petersen, M.B., and Willems, P.J. (2007). Mitochondrial deafness. *Clin. Genet.* 71,  
836 379–391.
- 837 Kollmar, R., Fak, J., Montgomery, L.G., and Hudspeth, A.J. (1997). Hair cell-specific splicing of  
838 mRNA for the alpha1D subunit of voltage-gated Ca<sup>2+</sup> channels in the chicken’s cochlea. *Proc.*  
839 *Natl. Acad. Sci. U.S.A.* 94, 14889–14893.
- 840 Koschak, A., Reimer, D., Huber, I., Grabner, M., Glossmann, H., Engel, J., and Striessnig, J.  
841 (2001). alpha 1D (Cav1.3) subunits can form I-type Ca<sup>2+</sup> channels activating at negative  
842 voltages. *J. Biol. Chem.* 276, 22100–22106.
- 843 Kujawa, S.G., and Liberman, M.C. (2009). Adding insult to injury: cochlear nerve degeneration  
844 after “temporary” noise-induced hearing loss. *The Journal of Neuroscience : The Official Journal*  
845 *of the Society for Neuroscience* 29, 14077–14085.
- 846 Kwan, K.M., Fujimoto, E., Grabher, C., Mangum, B.D., Hardy, M.E., Campbell, D.S., Parant, J.M.,  
847 Yost, H.J., Kanki, J.P., and Chien, C.-B. (2007). The Tol2kit: a multisite gateway-based  
848 construction kit for Tol2 transposon transgenesis constructs. *Dev. Dyn.* 236, 3088–3099.
- 849 Kwon, S.-K., Sando, R., Lewis, T.L., Hirabayashi, Y., Maximov, A., and Polleux, F. (2016). LKB1  
850 Regulates Mitochondria-Dependent Presynaptic Calcium Clearance and Neurotransmitter  
851 Release Properties at Excitatory Synapses along Cortical Axons. *PLOS Biology* 14, e1002516.
- 852 Lagnado, L., and Schmitz, F. (2015). Ribbon Synapses and Visual Processing in the Retina.  
853 *Annual Review of Vision Science* 1, 235–262.
- 854 Lepeta, K., Lourenco, M.V., Schweitzer, B.C., Martino Adami, P.V., Banerjee, P., Catuara-Solarz,  
855 S., de La Fuente Revenga, M., Guillem, A.M., Haidar, M., Ijomone, O.M., et al. (2016).  
856 Synaptopathies: synaptic dysfunction in neurological disorders – A review from students to  
857 students. *J Neurochem* 138, 785–805.
- 858 Levy, M., Faas, G.C., Saggau, P., Craigen, W.J., and Sweatt, J.D. (2003). Mitochondrial Regulation  
859 of Synaptic Plasticity in the Hippocampus. *Journal of Biological Chemistry* 278, 17727–17734.

- 860 Liberman, L.D., and Liberman, M.C. (2016). Postnatal maturation of auditory-nerve  
861 heterogeneity, as seen in spatial gradients of synapse morphology in the inner hair cell area.  
862 *Hearing Research* 339, 12–22.
- 863 Liberman, L.D., Wang, H., and Liberman, M.C. (2011). Opposing Gradients of Ribbon Size and  
864 AMPA Receptor Expression Underlie Sensitivity Differences among Cochlear-Nerve/Hair-Cell  
865 Synapses. *J Neurosci* 31, 801–808.
- 866 Liberman, L.D., Liberman, M.C., and Liberman, M.C. (2015). Dynamics of cochlear synaptopathy  
867 after acoustic overexposure. *Journal of the Association for Research in Otolaryngology* 16, 205–  
868 219.
- 869 Liberman, M.C., Dodds, L.W., and Pierce, S. (1990). Afferent and efferent innervation of the cat  
870 cochlea: quantitative analysis with light and electron microscopy. *The Journal of Comparative*  
871 *Neurology* 301, 443–60.
- 872 Lioudyno, M., Hiel, H., Kong, J.-H., Katz, E., Waldman, E., Parameshwaran-Iyer, S., Glowatzki, E.,  
873 and Fuchs, P.A. (2004). A “synaptoplasmic cistern” mediates rapid inhibition of cochlear hair  
874 cells. *J. Neurosci.* 24, 11160–11164.
- 875 Llorente-Folch, I., Rueda, C.B., Pardo, B., Szabadkai, G., Duchen, M.R., and Satrustegui, J. (2015).  
876 The regulation of neuronal mitochondrial metabolism by calcium. *J Physiol* 593, 3447–3462.
- 877 Lukasz, D., and Kindt, K.S. (2018). In Vivo Calcium Imaging of Lateral-line Hair Cells in Larval  
878 Zebrafish. *J Vis Exp*.
- 879 Maeda, R., Kindt, K.S., Mo, W., Morgan, C.P., Erickson, T., Zhao, H., Clemens-Grisham, R., Barr-  
880 Gillespie, P.G., and Nicolson, T. (2014). Tip-link protein protocadherin 15 interacts with  
881 transmembrane channel-like proteins TMC1 and TMC2. *Proceedings of the National Academy*  
882 *of Sciences* 111, 12907–12912.
- 883 Magupalli, V.G., Schwarz, K., Alpadi, K., Natarajan, S., Seigel, G.M., and Schmitz, F. (2008).  
884 Multiple RIBEYE-RIBEYE interactions create a dynamic scaffold for the formation of synaptic  
885 ribbons. *The Journal of Neuroscience : The Official Journal of the Society for Neuroscience* 28,  
886 7954–7967.
- 887 Marcotti, W., Johnson, S.L., Rusch, A., and Kros, C.J. (2003). Sodium and calcium currents shape  
888 action potentials in immature mouse inner hair cells. *J. Physiol. (Lond.)* 552, 743–761.
- 889 Matlib, M.A., Zhou, Z., Knight, S., Ahmed, S., Choi, K.M., Krause-Bauer, J., Phillips, R., Altschuld,  
890 R., Katsube, Y., Sperelakis, N., et al. (1998). Oxygen-bridged dinuclear ruthenium amine complex  
891 specifically inhibits Ca<sup>2+</sup> uptake into mitochondria in vitro and in situ in single cardiac  
892 myocytes. *Journal of Biological Chemistry* 273, 10223–10231.
- 893 Matthews, G., and Fuchs, P. (2010). The diverse roles of ribbon synapses in sensory  
894 neurotransmission. *Nat. Rev. Neurosci.* 11, 812–822.

- 895 McHenry, M.J., Feitl, K.E., Strother, J.A., and Van Trump, W.J. (2009). Larval zebrafish rapidly  
896 sense the water flow of a predator's strike. *Biology Letters* 5, 477–479.
- 897 Merchan-Perez, A., and Liberman, M.C. (1996). Ultrastructural differences among afferent  
898 synapses on cochlear hair cells: correlations with spontaneous discharge rate. *J. Comp. Neurol.*  
899 371, 208–221.
- 900 Metcalfe, W.K. (1985). Sensory neuron growth cones comigrate with posterior lateral line  
901 primordial cells in zebrafish. *The Journal of Comparative Neurology* 238, 218–224.
- 902 Moser, T., Brandt, A., and Lysakowski, A. (2006). Hair cell ribbon synapses. *Cell Tissue Res* 326,  
903 347–359.
- 904 Mulkey, R.M., and Malenka, R.C. (1992). Mechanisms underlying induction of homosynaptic  
905 long-term depression in area CA1 of the hippocampus. *Neuron* 9, 967–975.
- 906 Murakami, S.L., Cunningham, L.L., Werner, L.A., Bauer, E., Pujol, R., Raible, D.W., and Rubel,  
907 E.W. (2003). Developmental differences in susceptibility to neomycin-induced hair cell death in  
908 the lateral line neuromasts of zebrafish (*Danio rerio*). *Hearing Research* 186, 47–56.
- 909 Ohn, T.-L., Rutherford, M.A., Jing, Z., Jung, S., Duque-Afonso, C.J., Hoch, G., Picher, M.M.,  
910 Scharinger, A., Strenzke, N., and Moser, T. (2016). Hair cells use active zones with different  
911 voltage dependence of Ca<sup>2+</sup> influx to decompose sounds into complementary neural codes.  
912 *Proceedings of the National Academy of Sciences* 113, E4716–E4725.
- 913 Ollion, J., Cochennec, J., Loll, F., Escudé, C., and Boudier, T. (2013). TANGO: a generic tool for  
914 high-throughput 3D image analysis for studying nuclear organization. *Bioinformatics* 29, 1840–  
915 1841.
- 916 Pickett, S.B., Thomas, E.D., Sebe, J.Y., Linbo, T., Esterberg, R., Hailey, D.W., and Raible, D.W.  
917 (2018). Cumulative mitochondrial activity correlates with ototoxin susceptibility in zebrafish  
918 mechanosensory hair cells. *Elife* 7.
- 919 Platzer, J., Engel, J., Schrott-Fischer, A., Stephan, K., Bova, S., Chen, H., Zheng, H., and Striessnig,  
920 J. (2000). Congenital deafness and sinoatrial node dysfunction in mice lacking class D L-type  
921 Ca<sup>2+</sup> channels. *Cell* 102, 89–97.
- 922 Rizzuto, R., Nakase, H., Darras, B., Francke, U., Fabrizi, G.M., Mengel, T., Walsh, F., Kadenbach,  
923 B., DiMauro, S., and Schon, E.A. (1989). A gene specifying subunit VIII of human cytochrome c  
924 oxidase is localized to chromosome 11 and is expressed in both muscle and non-muscle tissues.  
925 *J. Biol. Chem.* 264, 10595–10600.
- 926 Safieddine, S., El-Amraoui, A., and Petit, C. (2012). The Auditory Hair Cell Ribbon Synapse: From  
927 Assembly to Function. *Annual Review of Neuroscience* 35, 509–528.

- 928 Santos, F., MacDonald, G., Rubel, E.W., and Raible, D.W. (2006). Lateral line hair cell maturation  
929 is a determinant of aminoglycoside susceptibility in zebrafish (*Danio rerio*). *Hearing Research*  
930 *213*, 25–33.
- 931 Schindelin, J., Arganda-Carreras, I., Frise, E., Kaynig, V., Longair, M., Pietzsch, T., Preibisch, S.,  
932 Rueden, C., Saalfeld, S., Schmid, B., et al. (2012). Fiji: an open-source platform for biological-  
933 image analysis. *Nat. Methods* *9*, 676–682.
- 934 Schmitz, F., Königstorfer, A., and Südhof, T.C. (2000a). RIBEYE, a component of synaptic ribbons:  
935 a protein's journey through evolution provides insight into synaptic ribbon function. *Neuron* *28*,  
936 857–872.
- 937 Schmitz, F., Königstorfer, A., and Südhof, T.C. (2000b). RIBEYE, a component of synaptic  
938 ribbons: a protein's journey through evolution provides insight into synaptic ribbon function.  
939 *Neuron* *28*, 857–872.
- 940 Schnee, M.E., and Ricci, A.J. (2003). Biophysical and pharmacological characterization of  
941 voltage-gated calcium currents in turtle auditory hair cells. *J. Physiol. (Lond.)* *549*, 697–717.
- 942 Sheets, L. (2017). Excessive activation of ionotropic glutamate receptors induces apoptotic hair-  
943 cell death independent of afferent and efferent innervation. *Sci Rep* *7*, 41102.
- 944 Sheets, L., Trapani, J.G., Mo, W., Obholzer, N., and Nicolson, T. (2011a). Ribeye is required for  
945 presynaptic Ca(V)1.3a channel localization and afferent innervation of sensory hair cells.  
946 *Development* *138*, 1309–1319.
- 947 Sheets, L., Trapani, J.G., Mo, W., Obholzer, N., and Nicolson, T. (2011b). Ribeye is required for  
948 presynaptic Ca(V)1.3a channel localization and afferent innervation of sensory hair cells.  
949 *Development (Cambridge, England)* *138*, 1309–19.
- 950 Sheets, L., Kindt, K.S., and Nicolson, T. (2012). Presynaptic CaV1.3 channels regulate synaptic  
951 ribbon size and are required for synaptic maintenance in sensory hair cells. *J. Neurosci.* *32*,  
952 17273–17286.
- 953 Sheets, L., Hagen, M.W., and Nicolson, T. (2014). Characterization of Ribeye Subunits in  
954 Zebrafish Hair Cells Reveals That Exogenous Ribeye B-Domain and CtBP1 Localize to the Basal  
955 Ends of Synaptic Ribbons. *PLOS ONE* *9*, e107256.
- 956 Sheets, L., He, X.J., Olt, J., Schreck, M., Petralia, R.S., Wang, Y.-X., Zhang, Q., Beirl, A., Nicolson,  
957 T., Marcotti, W., et al. (2017). Enlargement of Ribbons in Zebrafish Hair Cells Increases Calcium  
958 Currents But Disrupts Afferent Spontaneous Activity and Timing of Stimulus Onset. *J. Neurosci.*  
959 *37*, 6299–6313.
- 960 Sheng, Z.-H., and Cai, Q. (2012). Mitochondrial transport in neurons: impact on synaptic  
961 homeostasis and neurodegeneration. *Nature Reviews Neuroscience* *13*, 77–93.



- 962 Sidi, S., Busch-Nentwich, E., Friedrich, R., Schoenberger, U., and Nicolson, T. (2004). gemini  
963 encodes a zebrafish L-type calcium channel that localizes at sensory hair cell ribbon synapses. *J.*  
964 *Neurosci.* *24*, 4213–4223.
- 965 Song, H., Nie, L., Rodriguez-Contreras, A., Sheng, Z.-H., and Yamoah, E.N. (2003). Functional  
966 interaction of auxiliary subunits and synaptic proteins with Ca(v)1.3 may impart hair cell Ca<sup>2+</sup>  
967 current properties. *J. Neurophysiol.* *89*, 1143–1149.
- 968 Song, Q., Shen, P., Li, X., Shi, L., Liu, L., Wang, J., Yu, Z., Stephen, K., Aiken, S., Yin, S., et al.  
969 (2016). Coding deficits in hidden hearing loss induced by noise: the nature and impacts.  
970 *Scientific Reports* *6*, 25200.
- 971 Srivastava, S. (2016). Emerging therapeutic roles for NAD<sup>+</sup> metabolism in mitochondrial and  
972 age-related disorders. *Clin Trans Med* *5*, 25.
- 973 Stankiewicz, T.R., Gray, J.J., Winter, A.N., and Linseman, D.A. (2014). C-terminal binding  
974 proteins: central players in development and disease. *Biomolecular Concepts* *5*, 489–511.
- 975 Thevenaz, P., Ruttimann, U.E., and Unser, M. (1998). A pyramid approach to subpixel  
976 registration based on intensity. *IEEE Transactions on Image Processing* *7*, 27–41.
- 977 Thio, S.S.C., Bonventre, J.V., and Hsu, S.I.-H. (2004). The CtBP2 co-repressor is regulated by  
978 NADH-dependent dimerization and possesses a novel N-terminal repression domain. *Nucleic*  
979 *Acids Res* *32*, 1836–1847.
- 980 Todorova, V., and Blokland, A. (2017). Mitochondria and Synaptic Plasticity in the Mature and  
981 Aging Nervous System. *Current Neuropharmacology* *15*, 166–173.
- 982 tom Dieck, S., Altrock, W.D., Kessels, M.M., Qualmann, B., Regus, H., Brauner, D., Fejtová, A.,  
983 Bracko, O., Gundelfinger, E.D., and Brandstätter, J.H. (2005). Molecular dissection of the  
984 photoreceptor ribbon synapse. *The Journal of Cell Biology* *168*, 825–836.
- 985 Tritsch, N.X., Yi, E., Gale, J.E., Glowatzki, E., and Bergles, D.E. (2007). The origin of spontaneous  
986 activity in the developing auditory system. *Nature* *450*, 50–55.
- 987 Tritsch, N.X., Rodríguez-Contreras, A., Crins, T.T.H., Wang, H.C., Borst, J.G.G., and Bergles, D.E.  
988 (2010). Calcium action potentials in hair cells pattern auditory neuron activity before hearing  
989 onset. *Nat. Neurosci.* *13*, 1050–1052.
- 990 Tucker, T., and Fettiplace, R. (1995). Confocal imaging of calcium microdomains and calcium  
991 extrusion in turtle hair cells. *Neuron* *15*, 1323–1335.
- 992 Vos, M., Lauwers, E., and Verstreken, P. (2010). Synaptic mitochondria in synaptic transmission  
993 and organization of vesicle pools in health and disease. *Front Synaptic Neurosci* *2*, 139.

- 994 Wang, X., Zhu, Y., Long, H., Pan, S., Xiong, H., Fang, Q., Hill, K., Lai, R., Yuan, H., and Sha, S.-H.  
995 (2018). Mitochondrial Calcium Transporters Mediate Sensitivity to Noise-Induced Losses of Hair  
996 Cells and Cochlear Synapses. *Front Mol Neurosci* *11*, 469.
- 997 Xu, W., and Lipscombe, D. (2001). Neuronal Ca(V)1.3alpha(1) L-type channels activate at  
998 relatively hyperpolarized membrane potentials and are incompletely inhibited by  
999 dihydropyridines. *J. Neurosci.* *21*, 5944–5951.
- 1000 Yamoah, E.N., Lumpkin, E.A., Dumont, R.A., Smith, P.J., Hudspeth, A.J., and Gillespie, P.G.  
1001 (1998). Plasma membrane Ca<sup>2+</sup>-ATPase extrudes Ca<sup>2+</sup> from hair cell stereocilia. *J. Neurosci.* *18*,  
1002 610–624.
- 1003 Yin, Y., Liberman, L.D., Maison, S.F., and Liberman, M.C. (2014). Olivocochlear innervation  
1004 maintains the normal modiolar-pillar and habenular-cuticular gradients in cochlear synaptic  
1005 morphology. *Journal of the Association for Research in Otolaryngology : JARO* *15*, 571–83.
- 1006 Zenisek, D., and Matthews, G. (2000). The role of mitochondria in presynaptic calcium handling  
1007 at a ribbon synapse. *Neuron* *25*, 229–237.
- 1008 Zhang, L., Engler, S., Koepcke, L., Steenken, F., and Köppl, C. (2018a). Concurrent gradients of  
1009 ribbon volume and AMPA-receptor patch volume in cochlear afferent synapses on gerbil inner  
1010 hair cells. *Hearing Research* *364*, 81–89.
- 1011 Zhang, Q., Li, S., Wong, H.-T.C., He, X.J., Beirl, A., Petralia, R.S., Wang, Y.-X., and Kindt, K.S.  
1012 (2018b). Synaptically silent sensory hair cells in zebrafish are recruited after damage. *Nat*  
1013 *Commun* *9*, 1388.
- 1014
- 1015
- 1016
- 1017

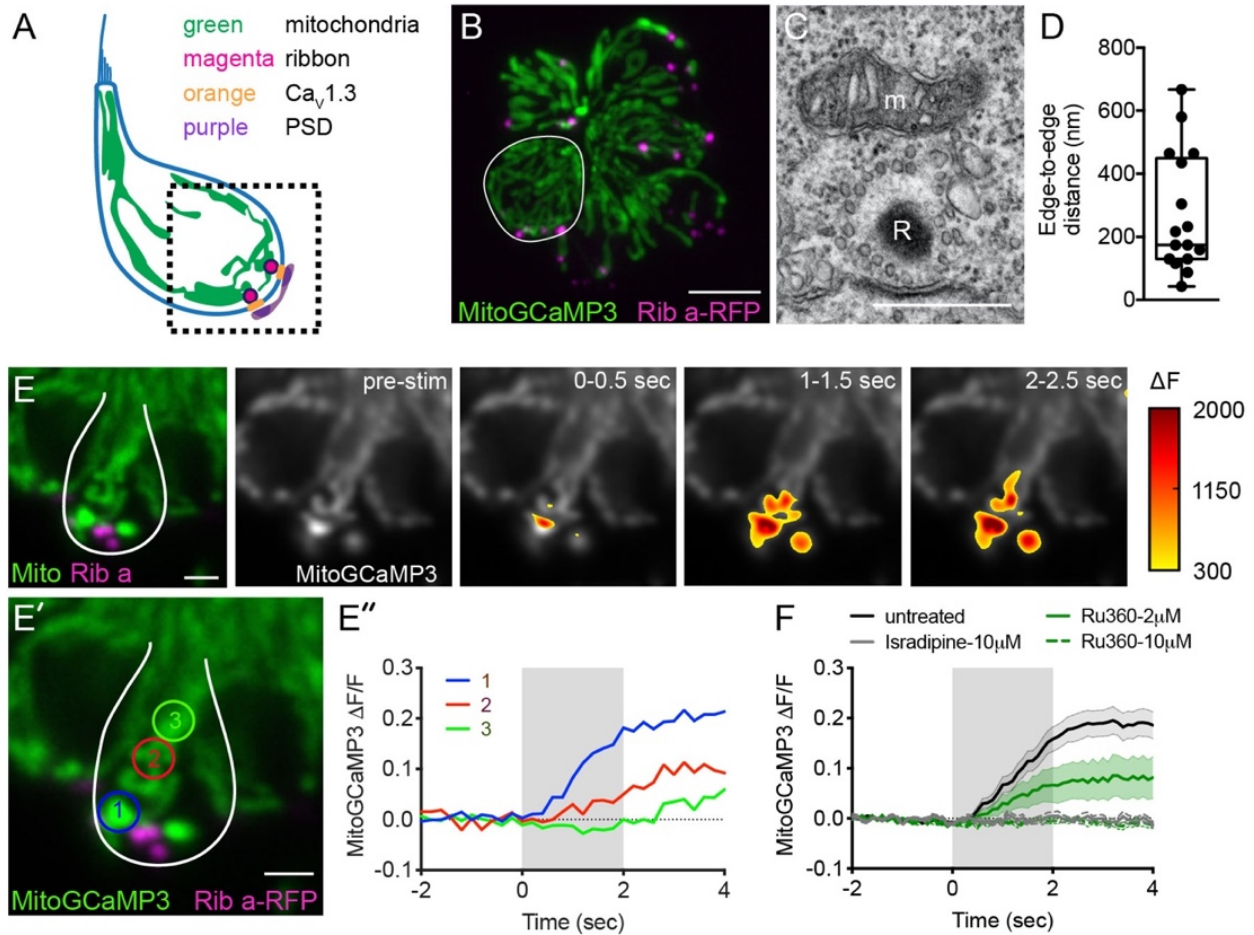

1018

1019

1020

1021

1022

1023

1024

1025

1026

1027

1028

1029

1030

1031

**Figure 1.** Mito- $\text{Ca}^{2+}$  uptake initiates adjacent to ribbons. A, cartoon illustration of a lateral-line hair cell containing: an apical mechanosensory bundle (blue), mitochondria (green), presynaptic ribbons (magenta),  $\text{Ca}_v1.3$  channels (orange) and postsynaptic densities (purple). B, Airyscan confocal image of 6 live hair cells (1 cell outlined in white) expressing MitoGCaMP3 (mitochondria) and Ribeye a-tagRFP (ribbons) in a developing neuromast at 2 dpf. Also see Figure S1. C, A representative TEM showing a mitochondrion (m) in close proximity to a ribbon (R) at 4 dpf. D, Quantification of mitochondrion to ribbon distance in TEM sections ( $n = 17$  sections). E, Side-view of a hair cell (outlined in white) shows the spatio-temporal dynamics of evoked mito- $\text{Ca}^{2+}$  signals during a 2-s stimulation at 6 dpf. The MitoGCaMP3 signals are indicated by the heatmap and are overlaid onto the pre-stimulus grayscale image. E'-E'', Circles 1-3 (1.3  $\mu\text{m}$  diameter) denote regions used to generate the temporal traces of mito- $\text{Ca}^{2+}$  signals in E'': adjacent to the presynapse ("1"), and midbody ("2" and "3") in the same cell as E. F, Average evoked mito- $\text{Ca}^{2+}$  response before (solid black) and after 30 min incubation with 10  $\mu\text{M}$

1032 Ru360 (dashed green), 2  $\mu$ M Ru360 (green), or 10  $\mu$ M isradipine (gray) (3-5 dpf,  $n \geq 9$  cells per  
1033 treatment). Error bars in D are min and max; in F the shaded area denotes SEM. Scale bar = 500  
1034 nm in C, 5  $\mu$ m in B and 2  $\mu$ m in E and E'.

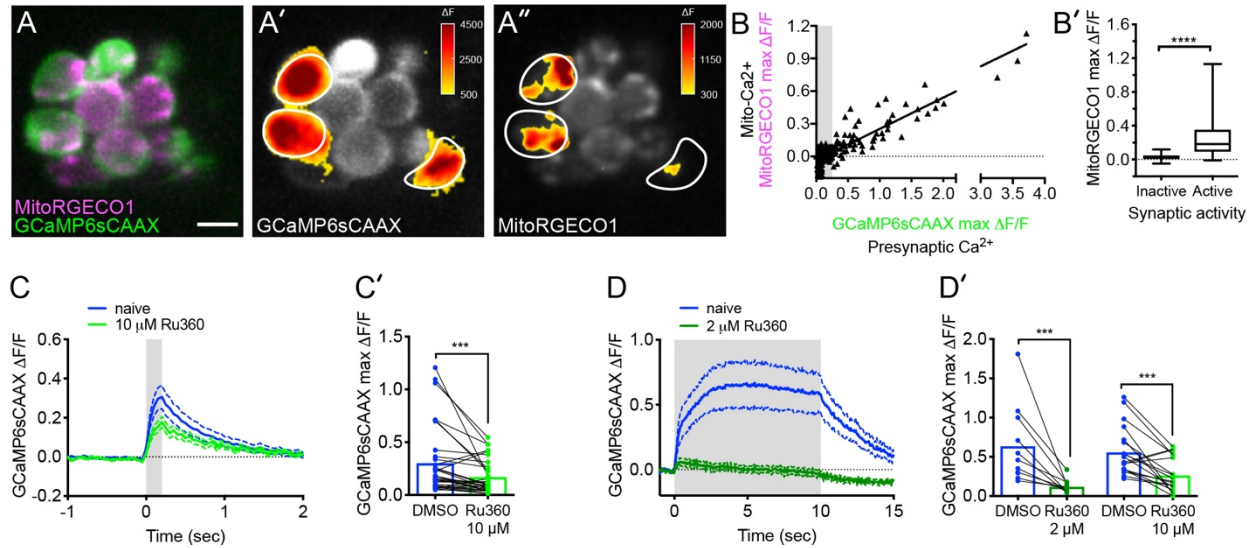

1035

1036

1037

1038

1039

1040

1041

1042

1043

1044

1045

1046

1047

1048

1049

1050

1051

**Figure 2.** Mito- $Ca^{2+}$  uptake can impact presynaptic  $Ca^{2+}$  signals. A, A live Image of a neuromast viewed top-down, expressing the presynaptic- $Ca^{2+}$  sensor GCaMP6sCAAX (green) and mito- $Ca^{2+}$  sensor MitoRGECO1 (magenta) at 3 dpf. The GCaMP6sCAAX (A') and MitoRGECO1 (A'') signals during a 2-s stimulation are indicated by the heatmaps and occur in the same cells (white outline). B, Scatterplot with linear regression of peak presynaptic- and mito- $Ca^{2+}$  response for individual cells at 3-5 dpf,  $n = 209$  cells. Gray background in graph denotes presynaptic- $Ca^{2+}$  signals below 0.25, a threshold used as a cutoff for presynaptic activity (below inactive, above active). B', Plot of mito- $Ca^{2+}$  responses segregated based on the activity threshold in B. C-D', Presynaptic- $Ca^{2+}$  response (example in Figure S2) averaged per cell before (blue) and after 30 min of 10  $\mu M$  Ru360 (light green) or 2  $\mu M$  Ru360 (dark green),  $n \geq 10$  cells per treatment. C and D show averaged traces while C' and D' show before-and-after dot plots of the peak response per cell. Whiskers on plots in B' represent min and max; error (dashed lines) in plots C and D represent SEM. Mann-Whitney U test was used in B'; Wilcoxon matched-pairs signed-rank test was used in C' and D'. \*\*\* $p < 0.001$ , \*\*\*\* $p < 0.0001$ . Scale bar = 5  $\mu m$  in A.

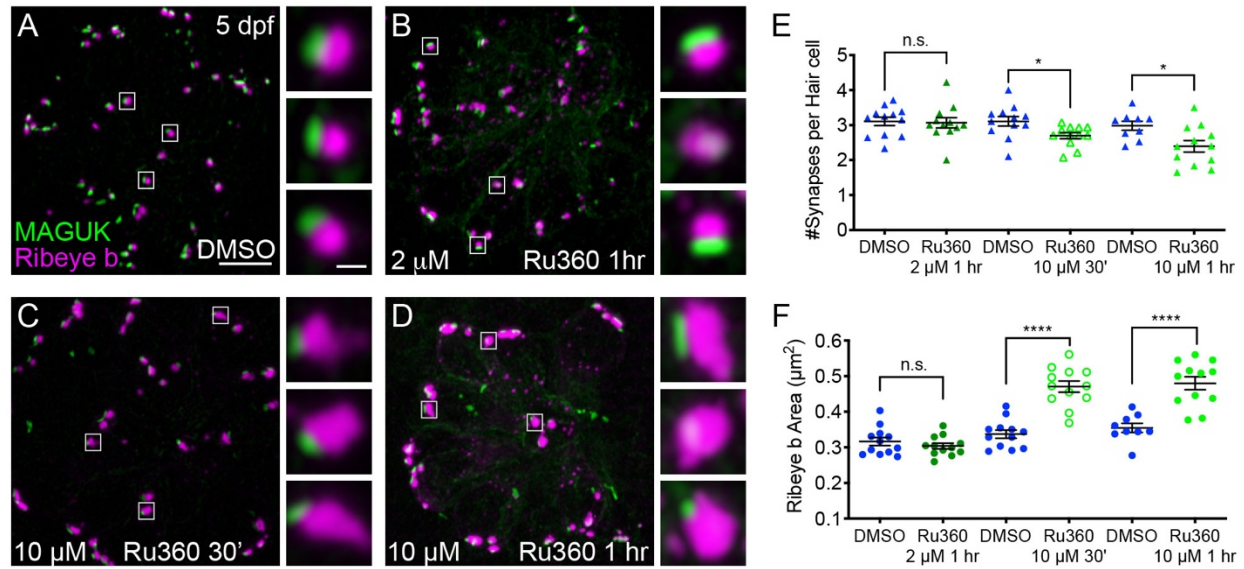

1052

1053 **Figure 3.** Mito- $\text{Ca}^{2+}$  is important for ribbon size and synapse integrity in mature hair cells. A-D,  
1054 Representative images of mature neuromasts (5 dpf) immunostained with Ribeye b (magenta,  
1055 ribbons) and MAGUK (green, postsynapses) after a 1 hr 0.1% DMSO (A), a 1 hr 2  $\mu\text{M}$  Ru360 (B),  
1056 a 30 min 10  $\mu\text{M}$  Ru360 (C), or a 1 hr 10  $\mu\text{M}$  Ru360 (D) treatment. Insets show 3 example  
1057 synapses (white squares). E-F, Scatter plots show synapse counts (E), and ribbon area (F) in  
1058 controls and in treatment groups.  $N \geq 9$  neuromasts per treatment. Error bars in E-F represent  
1059 SEM. A Welch's unequal variance  $t$ -test was used in E-F. \* $p < 0.05$ , \*\*\*\* $p < 0.0001$ . Scale bar = 5  
1060  $\mu\text{m}$  in A, and 2  $\mu\text{m}$  in inset.

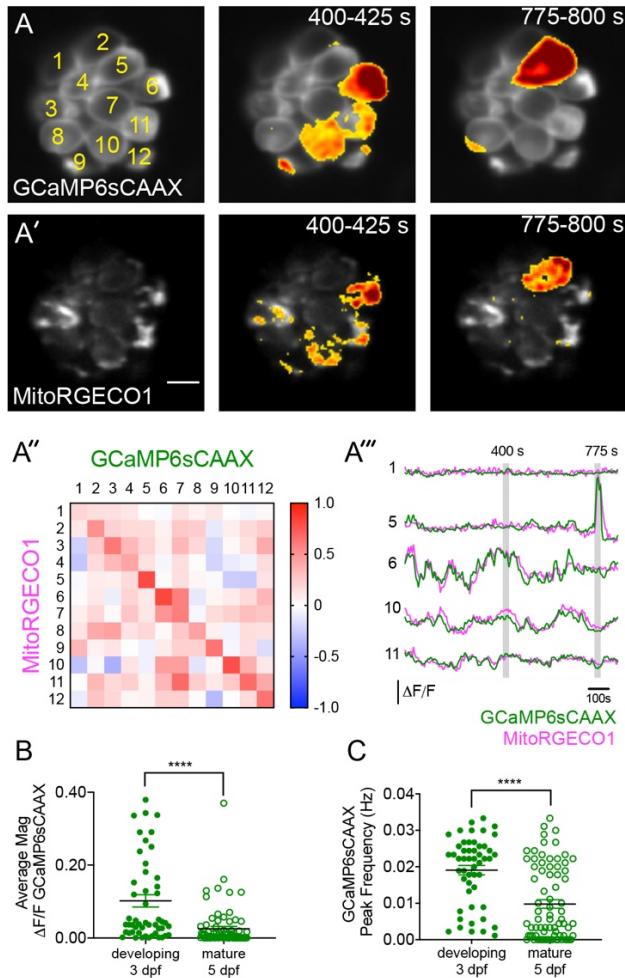

1061

1062 **Figure 4.** Spontaneous presynaptic-  $\text{Ca}^{2+}$  influx and Mito- $\text{Ca}^{2+}$  uptake are linked.

1063 A-A', A live Image of a neuromast viewed top-down, expressing the presynaptic- $\text{Ca}^{2+}$  sensor

1064 GCaMP6sCAAX (A) and mito- $\text{Ca}^{2+}$  sensor MitoRGECO1 (A') at 3 dpf. Example GCaMP6sCAAX (A')

1065 and MitoRGECO1 (A') signals during two 25-s windows within a 900-s acquisition are indicated

1066 by the  $\Delta\text{F}/\text{F}$  heatmaps and occur in the same cells. A'', A heatmap of Pearson correlation

1067 coefficients comparing GCaMP6sCAAX and MitoRGECO1 signals from the cells in A-A'.

1068 A''', Example GCaMP6sCAAX (green) MitoRGECO1 (magenta) traces during the 900-s acquisition

1069 from the 5 cells numbered in A, also see Movie S2. B, Scatterplot showing the average

1070 magnitude of GCaMP6sCAAX signals in developing and mature hair cells,  $n = 6$  neuromasts per

1071 age. C, Scatterplot showing frequency of GCaMP6sCAAX events in developing and mature hair

1072 cells,  $n = 6$  neuromasts. Error bars in B-C represent SEM. A Mann-Whitney U test was used in

1073 and C. \*\*\*\*  $p < 0.0001$ . Scale bar =  $5 \mu\text{m}$  in A.

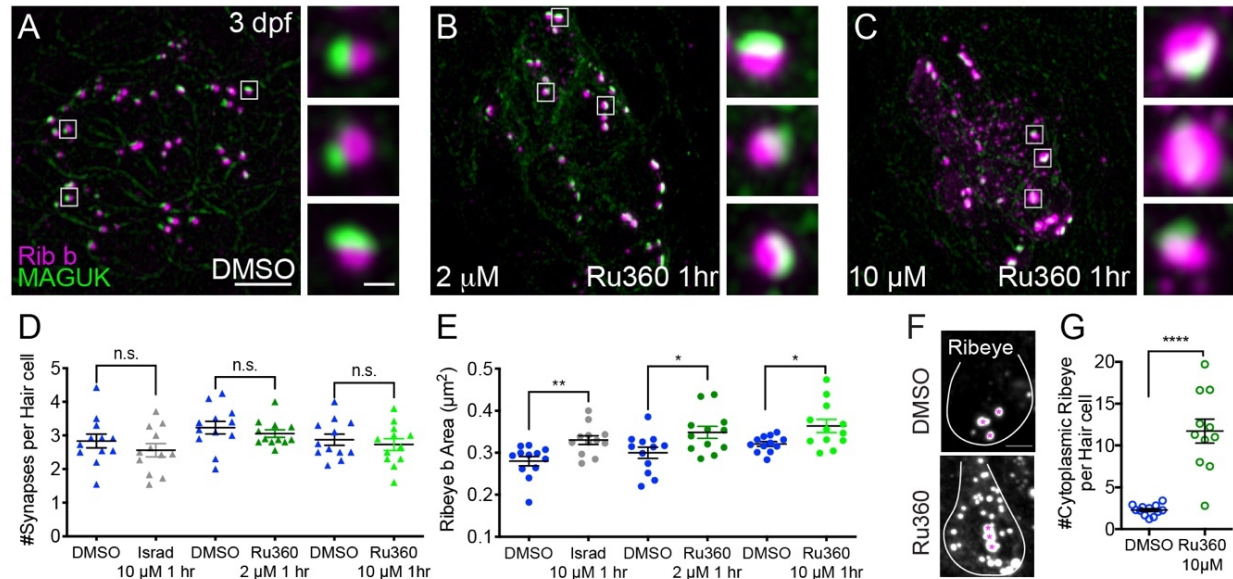

1074

1075 **Figure 5.** Mito- $\text{Ca}^{2+}$  regulates ribbon formation. A-C, Representative images of immature  
1076 neuromasts (3 dpf) immunostained with Ribeye b (magenta, ribbons) and MAGUK (green,  
1077 postsynapses) after a 1 hr 0.1% DMSO (A), 2  $\mu\text{M}$  Ru360 (B) or 10  $\mu\text{M}$  Ru360 (C) treatment.  
1078 Insets show 3 representative synapses (white squares) for each treatment. (D-E) Scatterplot

1079 show quantification of synapse number (D), and ribbon area (E) in controls and in treatment  
1080 groups. F, Side-view of hair cell (white outline) shows synaptic ribbon (magenta asterisks) and

1081 extrasynaptic Ribeye b aggregates after a 1 hr 0.1% DMSO or 10  $\mu\text{M}$  Ru360 treatment.  
1082 Quantification of extrasynaptic Ribeye puncta (G).  $N \geq 12$  neuromasts per treatment. Error bars

1083 in B-C represent SEM. Welch's unequal variance  $t$ -test was used in D-E and G, \* $p < 0.05$ , \*\* $p <$   
1084 0.01, \*\*\*\* $p < 0.0001$ . Scale bar = 5  $\mu\text{m}$  in A, 2  $\mu\text{m}$  in insets and F.

1085



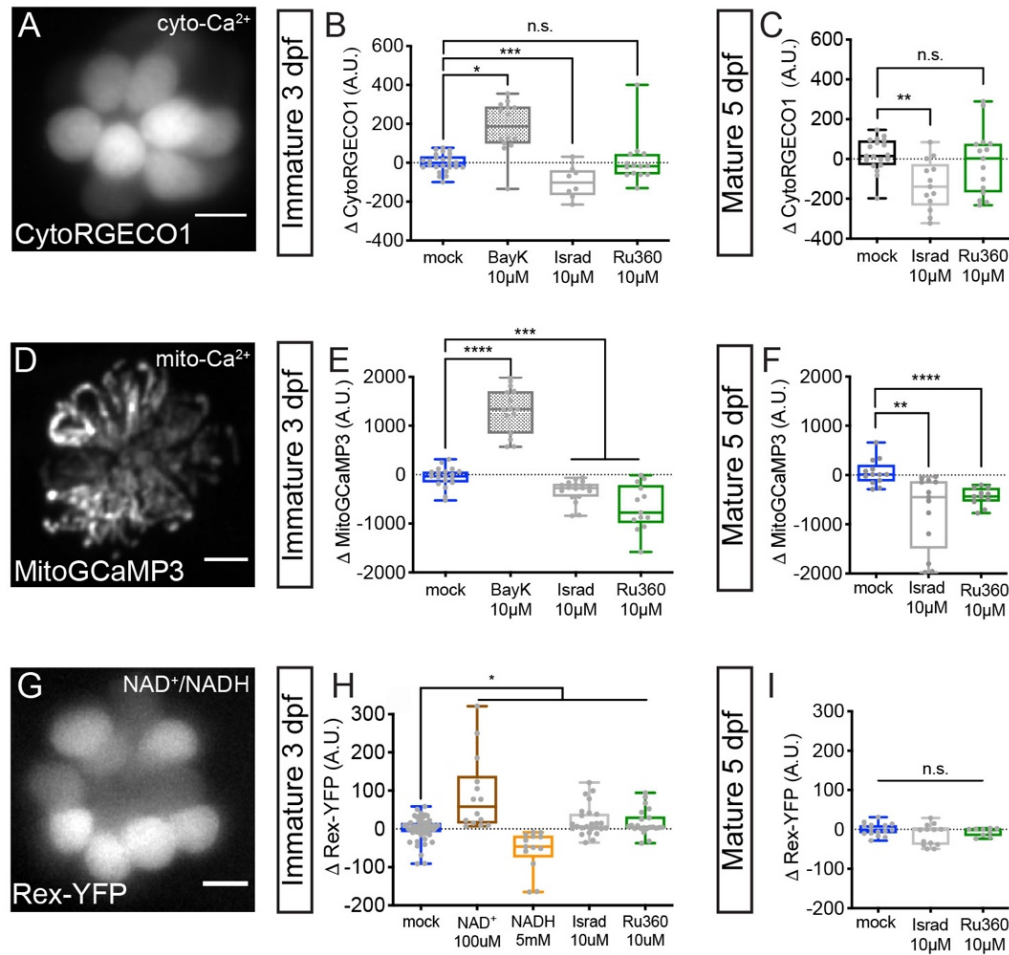

1086

1087 **Figure 6.** Cyto- $\text{Ca}^{2+}$ , mito- $\text{Ca}^{2+}$  and NAD<sup>+</sup>/NADH redox baseline measurements. Live hair cells  
 1088 expressing RGECO1 (A), MitoGCaMP3 (D), or Rex-YFP (G) show resting cyto- $\text{Ca}^{2+}$ , mito- $\text{Ca}^{2+}$  or  
 1089 NAD<sup>+</sup>/NADH levels respectively. B-C, RGECO1 baseline measurements before and after a 30 min  
 1090 mock treatment (0.1% DMSO), or after a 30 min 10  $\mu\text{M}$  Bay K8644 (BayK), 10  $\mu\text{M}$  isradipine, or  
 1091 10  $\mu\text{M}$  Ru360 treatment. E-F, MitoGCaMP3 baseline measurements before and after a 30 min  
 1092 mock treatment (0.1% DMSO), or after a 10  $\mu\text{M}$  BayK, 10  $\mu\text{M}$  isradipine, or 10  $\mu\text{M}$  Ru360  
 1093 treatment. H-I, Rex-YFP baseline measurements before and after 30 min mock treatment (0.1%  
 1094 DMSO), or after a 30 min 100  $\mu\text{M}$  NAD<sup>+</sup>, 5 mM NADH, 10  $\mu\text{M}$  isradipine, or 10  $\mu\text{M}$  Ru360  
 1095 treatment. All plots are box-and-whiskers plot that show median, min and max. N  $\geq$  9  
 1096 neuromasts per treatment. One-way Brown-Forsythe and Welch ANOVA with Dunnett's T3 post  
 1097 hoc was used to calculate the difference in B-C, E-F, and H-I, \* $p$  < 0.05, \*\* $p$  < 0.01, \*\*\* $p$  < 0.001,  
 1098 \*\*\*\* $p$  < 0.0001. Scale bar = 5  $\mu\text{m}$  in A, D and G.

1099

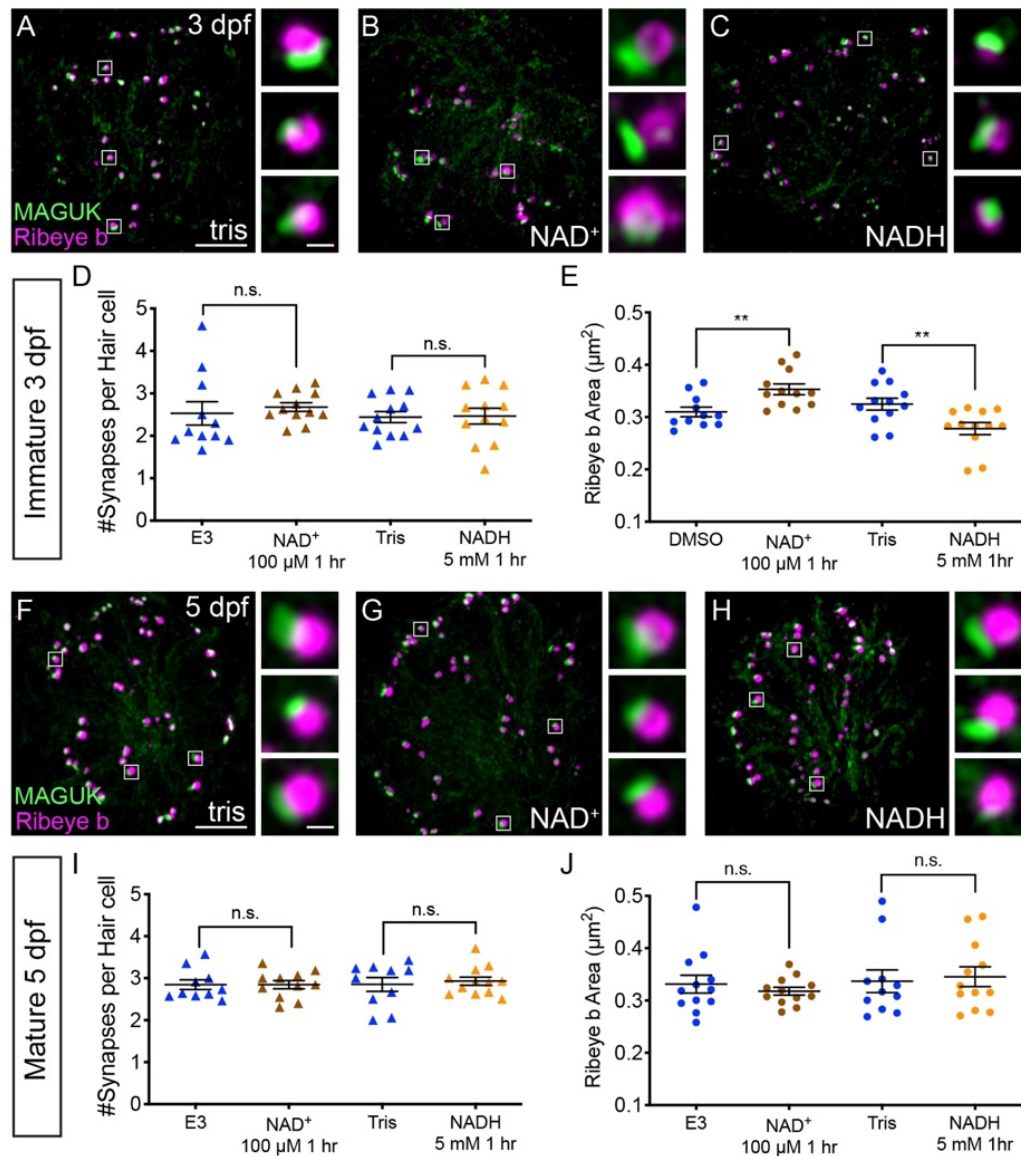

1100

1101 **Figure 7.** NAD<sup>+</sup> and NADH directly influence ribbon formation. Representative images of  
 1102 immature (A-C, 3 dpf) and mature (G-H, 5 dpf) neuromasts immunostained with Ribeye b  
 1103 (magenta, ribbons) and MAGUK (green, postsynapses) after a 0.1% Tris-HCl (A, F), 100  $\mu$ M NAD<sup>+</sup>  
 1104 (B, G) or 5 mM NADH treatment (C, H). Insets show 3 example synapses (white squares). D-E  
 1105 and I-J, Scatterplots show synapse count (D, I) and ribbon area (E, J) in controls and treatments  
 1106 groups. N  $\geq$  10 neuromasts per treatment. Error bars in B-C represent SEM. A Welch's unequal  
 1107 variance *t*-test was used for comparisons, \*\**p* < 0.01. Scale bar = 5  $\mu$ m in A and F, 2  $\mu$ m in insets.

1108

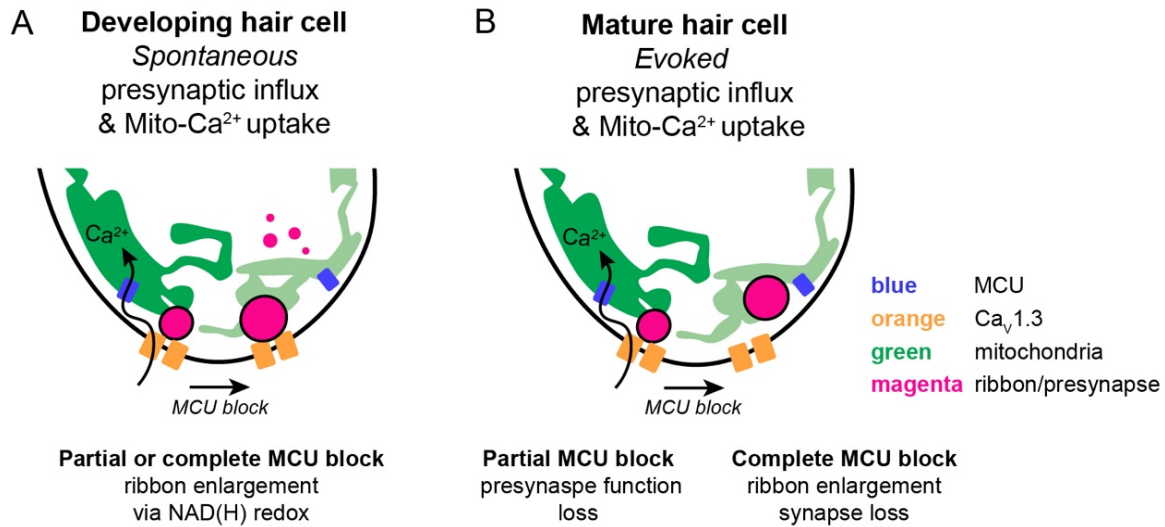

1109

1110 **Figure 8.** Schematic model of mito- $\text{Ca}^{2+}$  in developing and mature hair cells. A, In developing  
1111 hair cells, spontaneous presynaptic- $\text{Ca}^{2+}$  influx is linked to mito- $\text{Ca}^{2+}$  uptake. Together these  
1112  $\text{Ca}^{2+}$  signals function to regulate ribbon formation. When the  $\text{Ca}_v1.3$  or MCU channels are  
1113 blocked, ribbon formation is increased leading to larger ribbons. These  $\text{Ca}^{2+}$  signals regulate  
1114 ribbon formation via NAD(H) redox. B, In mature hair cells, evoked presynaptic- $\text{Ca}^{2+}$  influx is  
1115 linked to mito- $\text{Ca}^{2+}$  uptake. When the MCU is blocked in mature hair cells there are  
1116 synaptopathic consequences. Ribbons are enlarged and synapses are lost.

1117

1118 **Movie S1.** Airyscan image of MitoGCaMP3 and Rib a-tagRFP at the base of a single live hair cell.

1119 **Movie S2.** Spontaneous  $\Delta F$  GCaMP6sCAAX (left) and  $\Delta F$  MitoRGECO1 (right) signals acquired at

1120 3 dpf, 25-s per frame.

1121

1122

1123

1124

1125

1126

1127

1128

1129

1130

1131

1132

1133

1134

1135

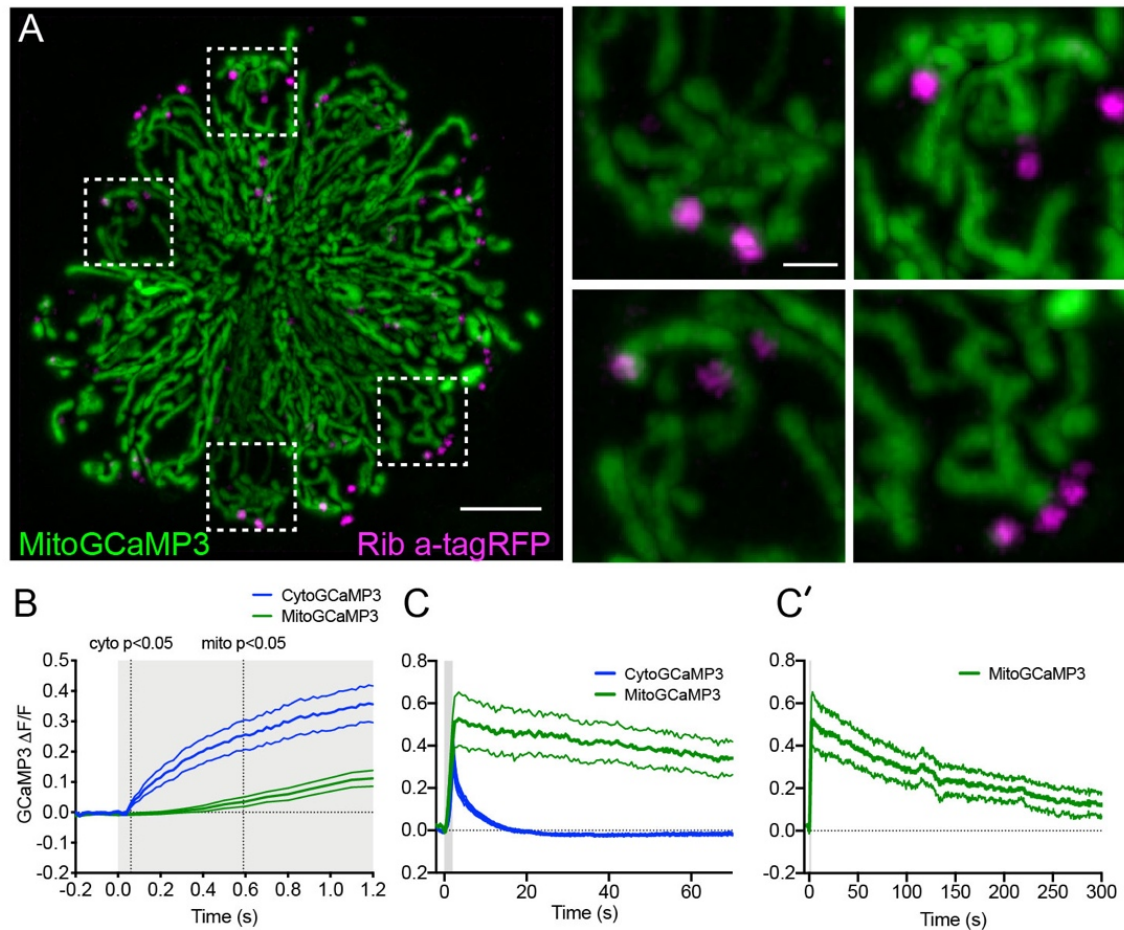

1136

1137 **Figure S1.** The time course of mechanically-evoked mito-Ca<sup>2+</sup> and cyto-Ca<sup>2+</sup> signals are distinct.

1138 A, Airyscan confocal image of a live, neuromast expressing MitoGCaMP3 (mitochondria) and

1139 Ribeye a-tagRFP (ribbons) at 6 dpf. Insets show the base of 4 individual hair cells from the

1140 neuromast in A (dashed white boxes). B, Average cyto- (blue) and mito-Ca<sup>2+</sup> (green) signals

1141 during the onset of a 2-s stimulus. Mito-Ca<sup>2+</sup> signals rise with a delay compared to cyto-Ca<sup>2+</sup>

1142 signals (3-6 dpf, n ≥ 18 cells). C-C', Average cyto- and mito-Ca<sup>2+</sup> signals during and after a 2-s

1143 stimulation shows that cyto-Ca<sup>2+</sup> signals return to baseline shortly after stimulation (C), while

1144 mito-Ca<sup>2+</sup> remains elevated up to 5 min after stimulation (C-C') (3 dpf, n ≥ 7 cells). Error in panel

1145 B-C' represent SEM. Scale bar = 5  $\mu$ m in A and 2  $\mu$ m in inset.

1146

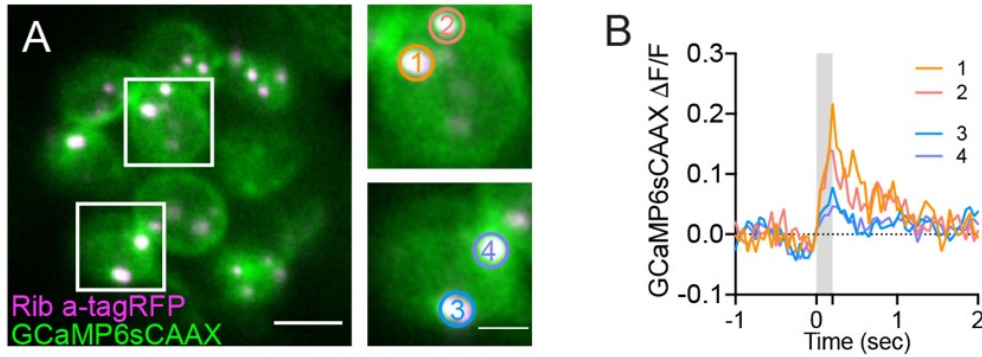

1147

1148 **Figure S2.** Presynaptic  $\text{Ca}^{2+}$  signals at the ribbon synapse. **A**, Live image of a neuromast viewed  
1149 top-down, expressing the presynaptic- $\text{Ca}^{2+}$  sensor GCaMP6sCAAX (green) and ribbon label  
1150 Ribeye a-tagRFP (magenta) at 3 dpf. Example cells show evoked synaptic- $\text{Ca}^{2+}$  signals during a  
1151 0.2-s stimulation (white boxes, duplicated on right). Circles 1-4 (1.3  $\mu\text{m}$  diameter) denote  
1152 regions used to generate the temporal traces of presynaptic- $\text{Ca}^{2+}$  signals in **B**. Scale bar = 5  $\mu\text{m}$   
1153 in **A** and 2  $\mu\text{m}$  in insets.

1154

1155

1156

1157

1158

1159

1160

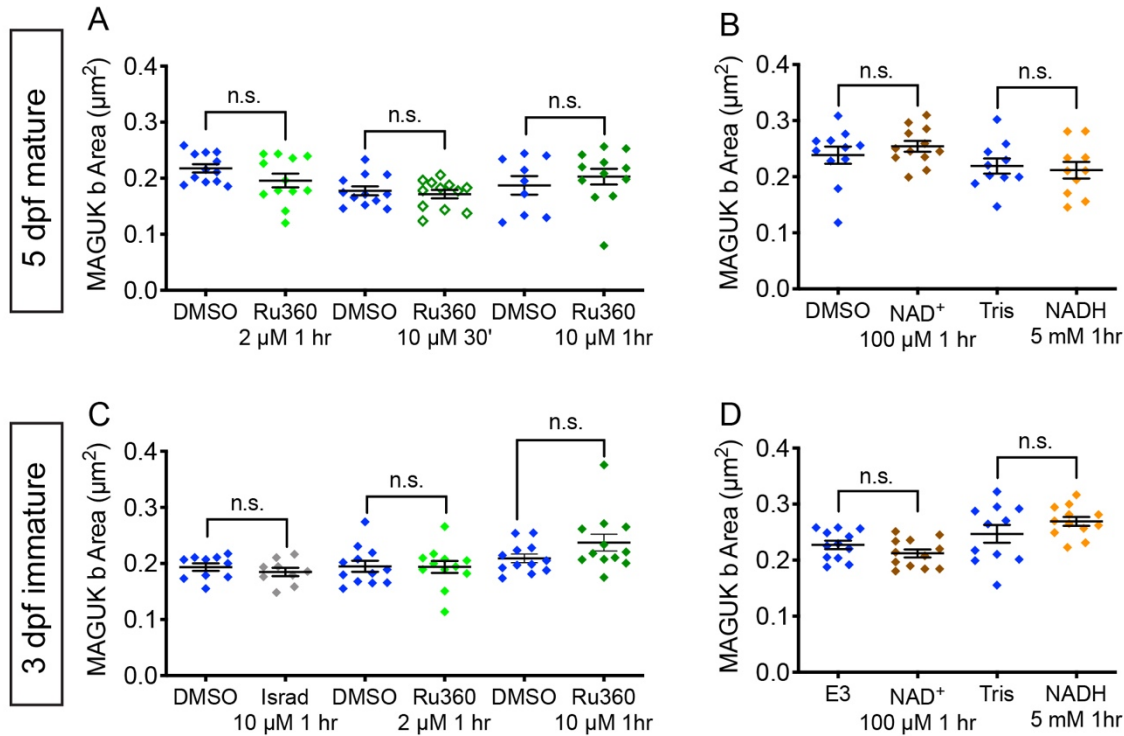

1161

1162 **Figure S3.** NAD<sup>+</sup>, NADH and Ru360 treatments do not impact postsynapse size. (A-D).

1163 Quantification of postsynapse size assayed by MAGUK immunolabel in mature (A-B) and

1164 developing neuromasts (C-D). Treatments with E3, 0.1% DMSO, 0.1% Tris-HCl, 100 µM NAD<sup>+</sup>, 5

1165 mM NADH treatment, 2 µM Ru360, 10 µM Ru360 do not significantly alter postsynapse size

1166 compared to controls. (C, H). N ≥ 9 neuromasts per treatment. Error bars in B-C represent SEM.

1167 A Welch's unequal variance *t*-test was used for comparisons.

1168

1169

1170

1171

1172

1173

1174

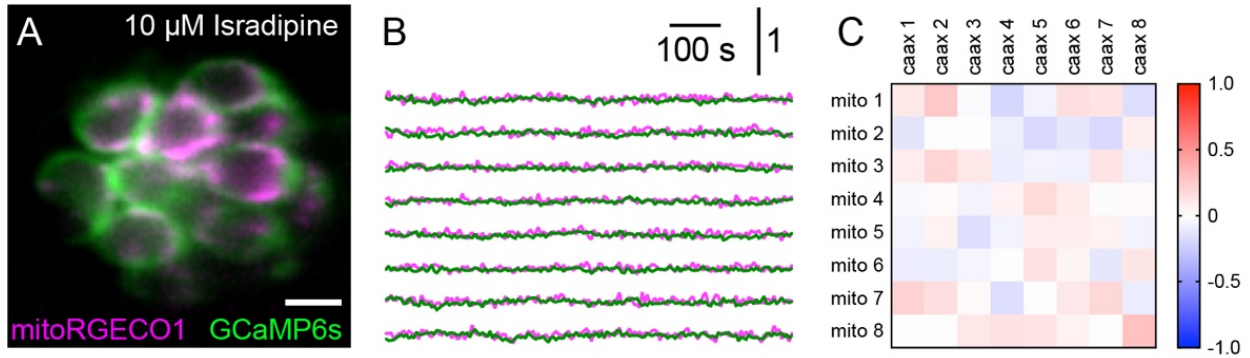

1175

1176 **Figure S4.** Spontaneous presynaptic and mito- $\text{Ca}^{2+}$  signals are abolished by  $\text{Ca}_v1.3$  channel  
1177 antagonist isradipine. A, A live Image of a neuromast viewed top-down, expressing the  
1178 presynaptic- $\text{Ca}^{2+}$  sensor GCaMP6sCAAX (green) and mito- $\text{Ca}^{2+}$  sensor MitoRGECO1 (magenta) at  
1179 6 dpf. B, Representative GCaMP6sCAAX (green) and MitoRGECO1 (magenta) traces during a  
1180 900-s continuous image acquisition in the absence of stimuli and 10  $\mu\text{M}$  isradipine. C, There is  
1181 no correlation between GCaMP6sCAAX and MitoRGECO1 signals within each cell in the  
1182 presence of isradipine.

1183

1184

1185

1186

1187

1188

1189

1190

1191

1192

1193

1194

1195

1196

1197



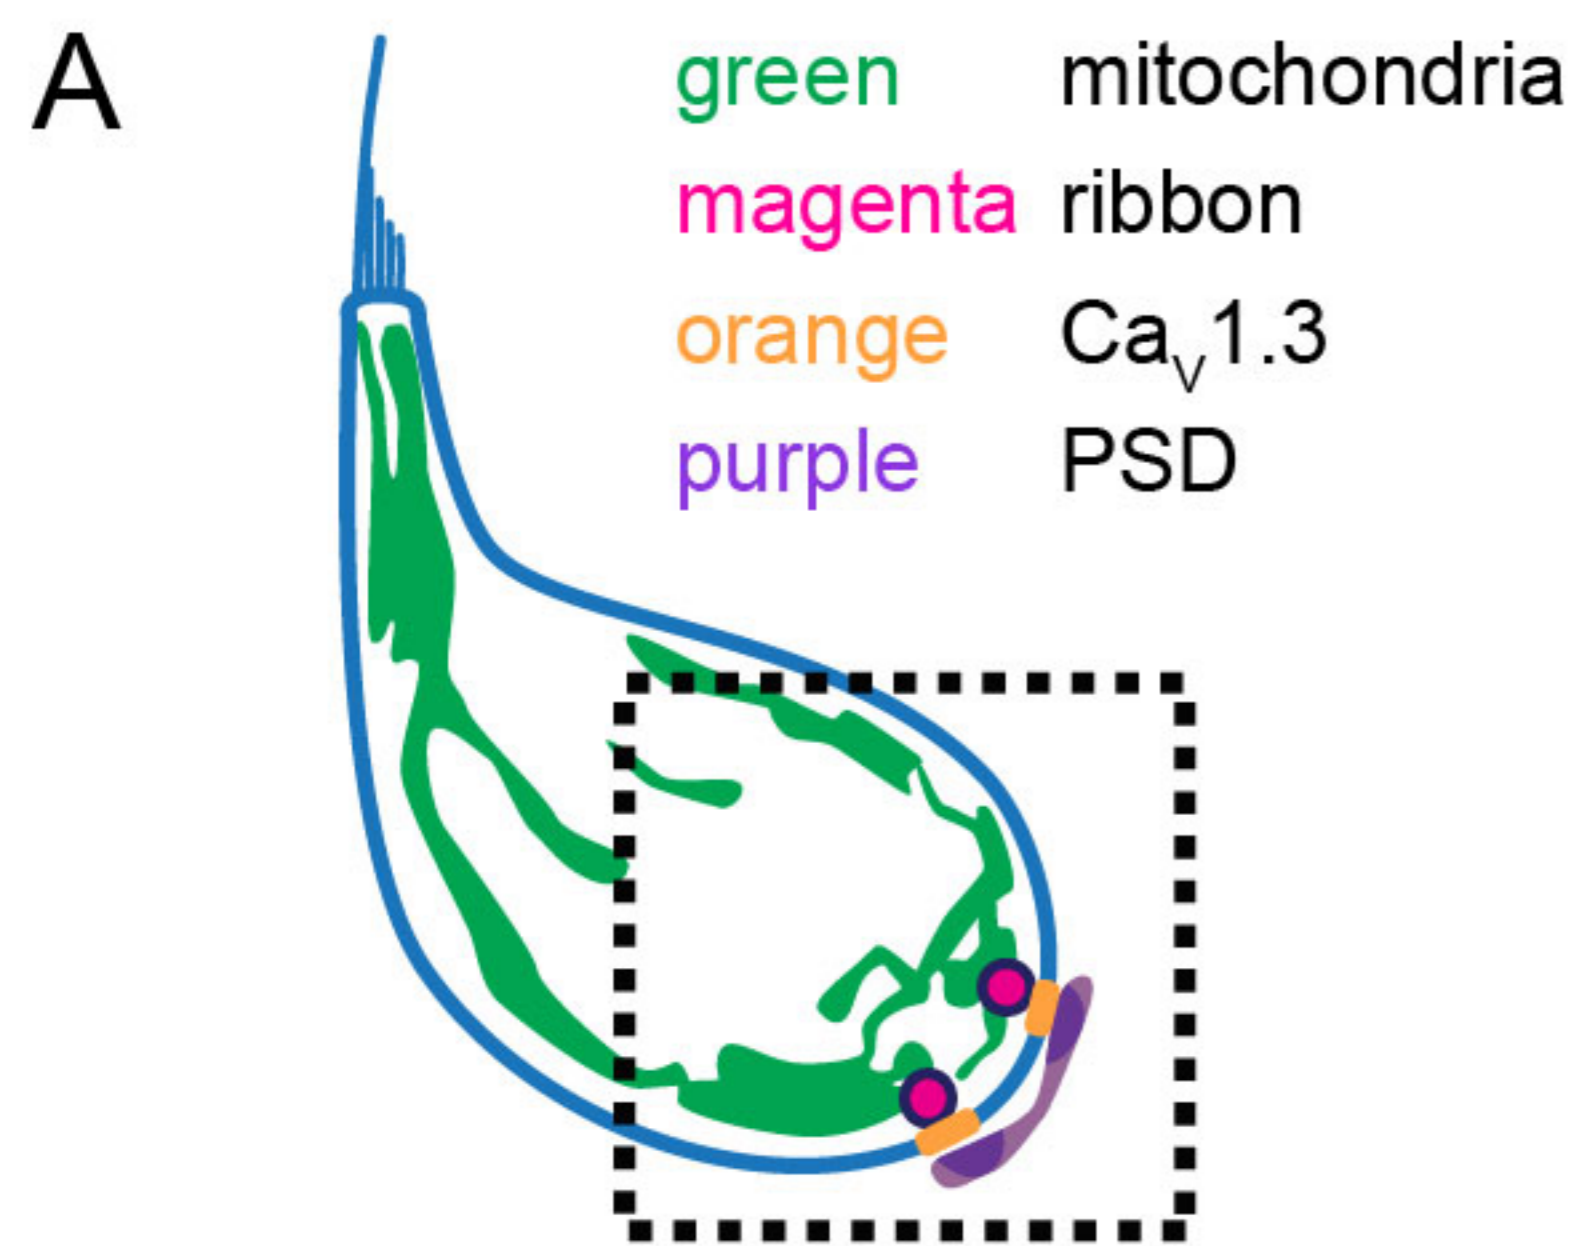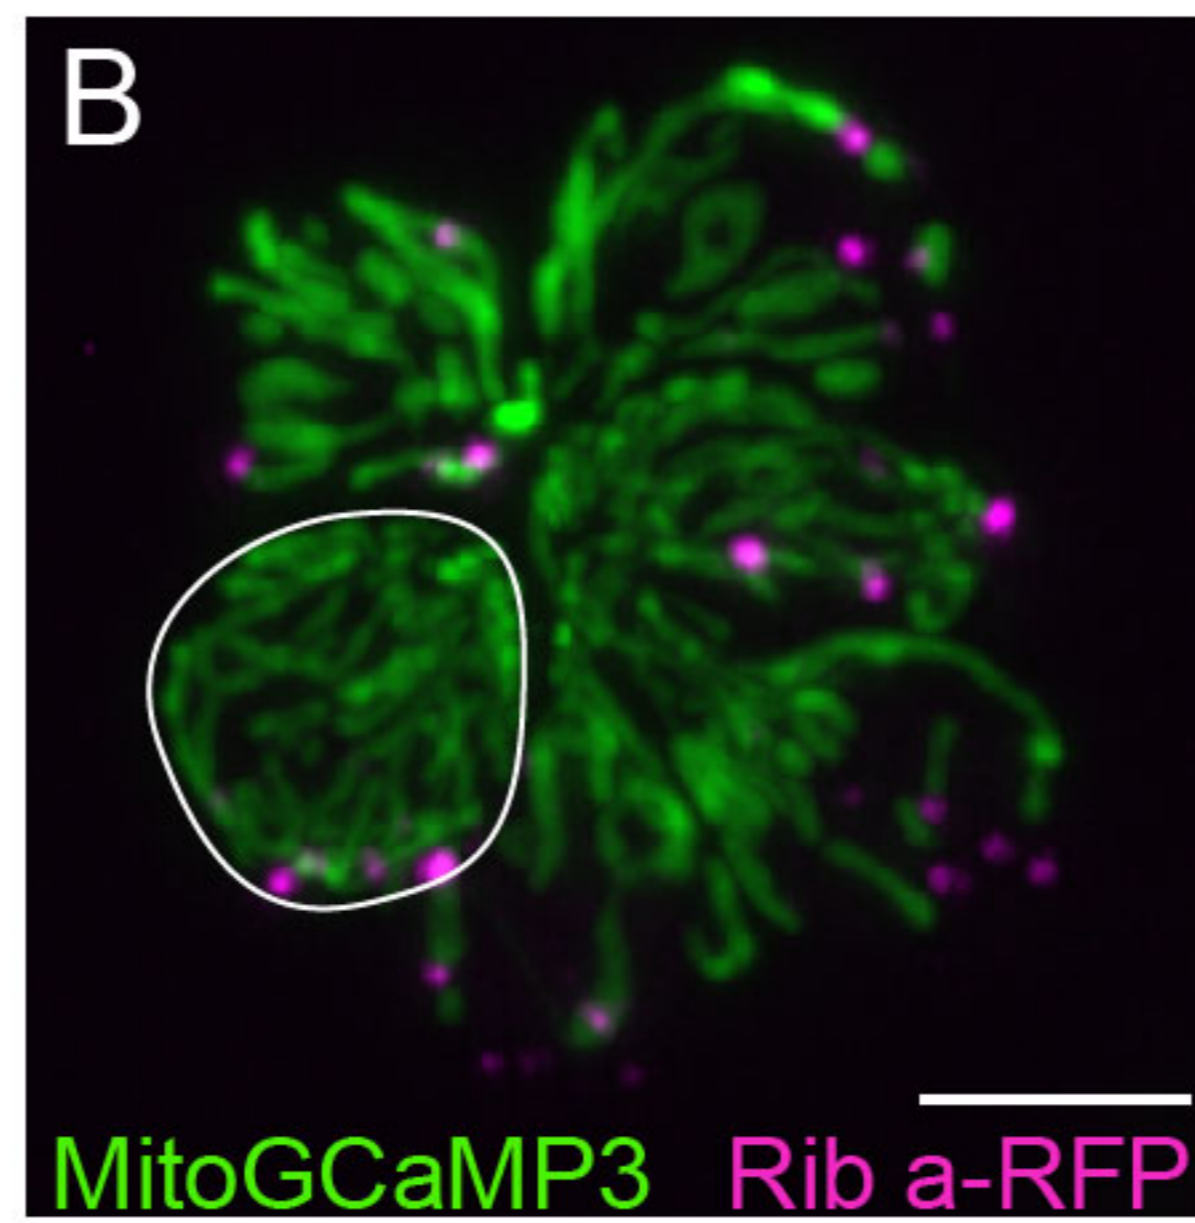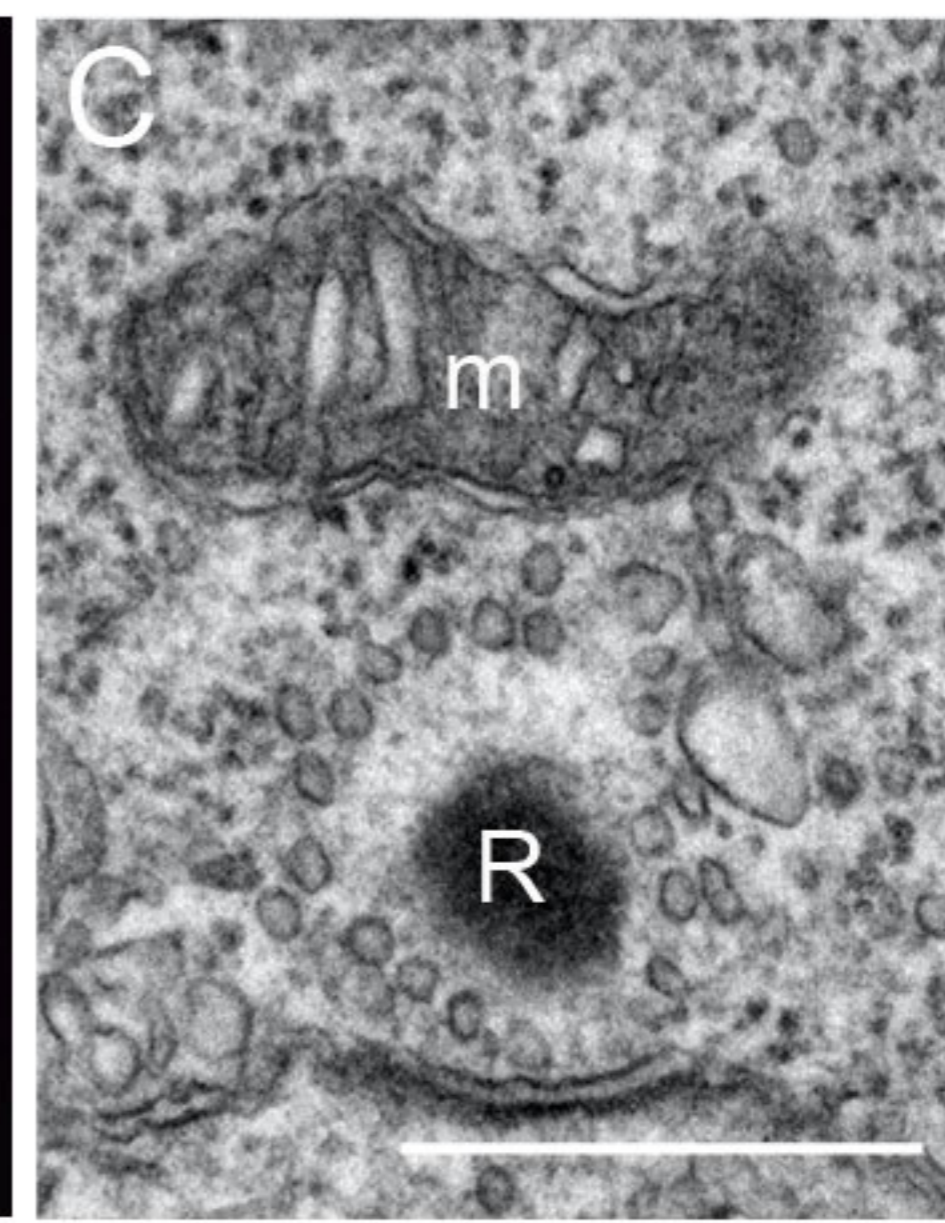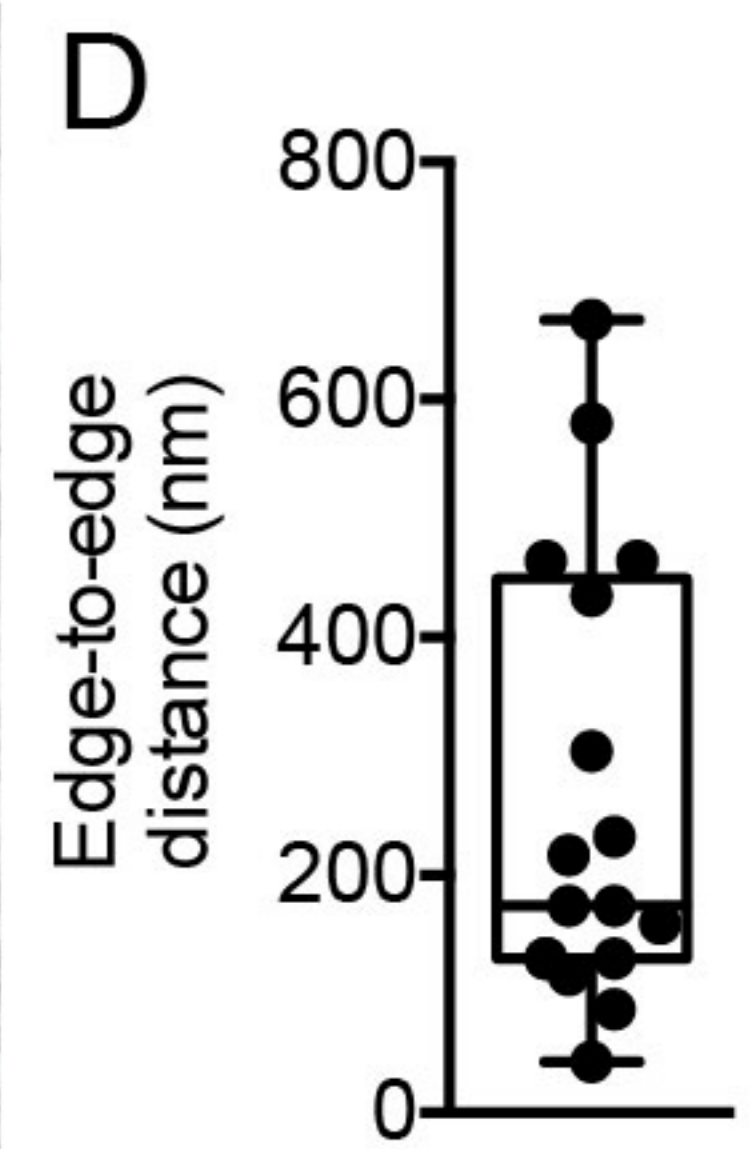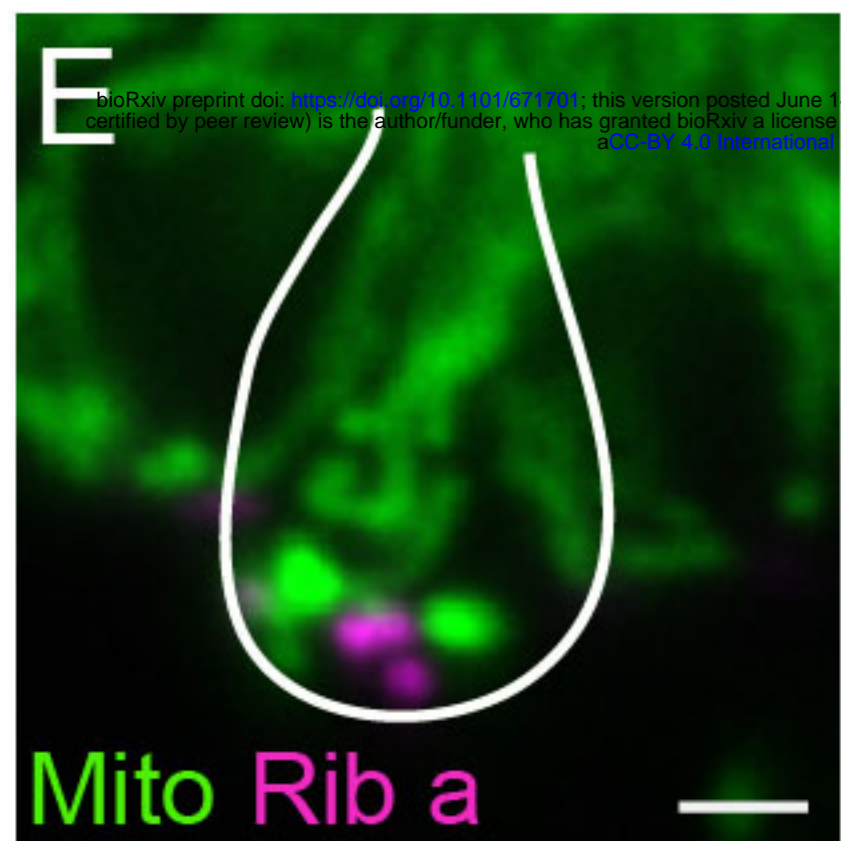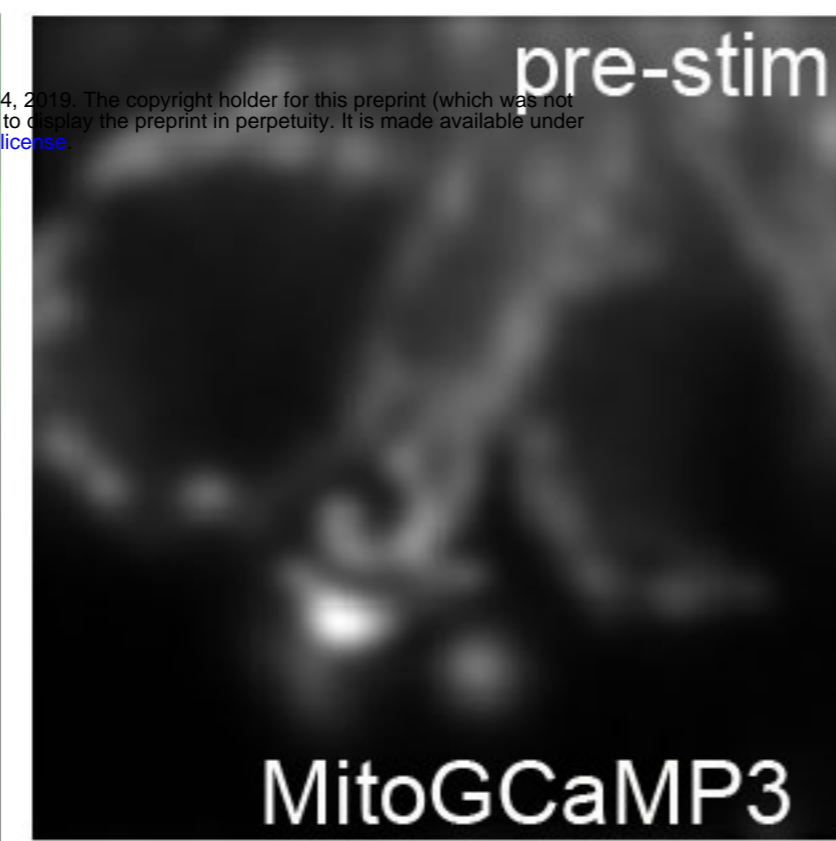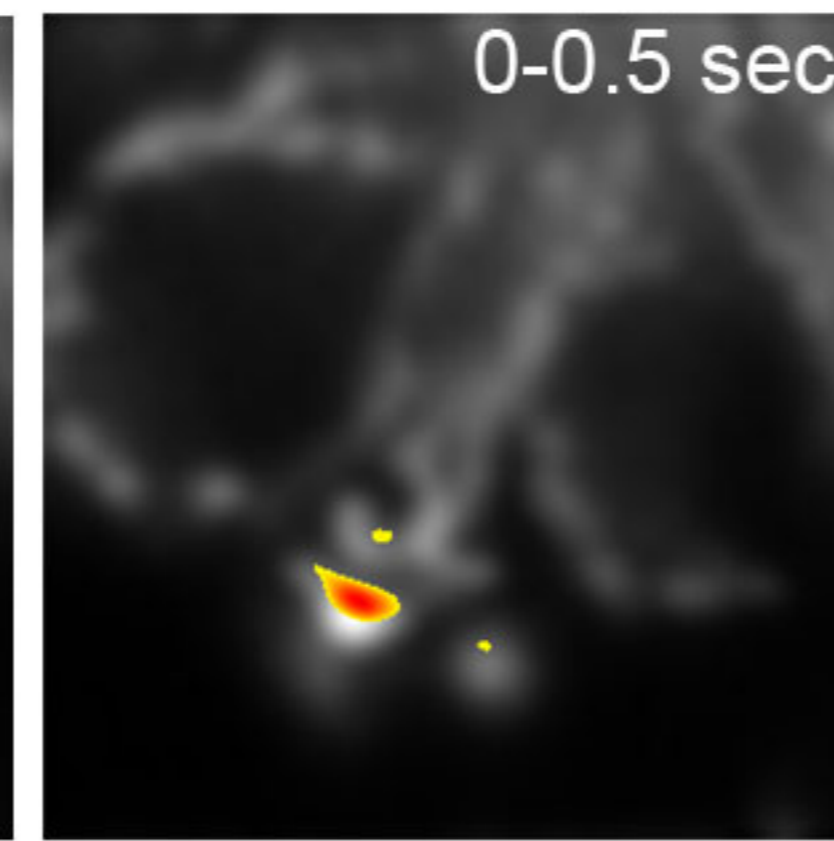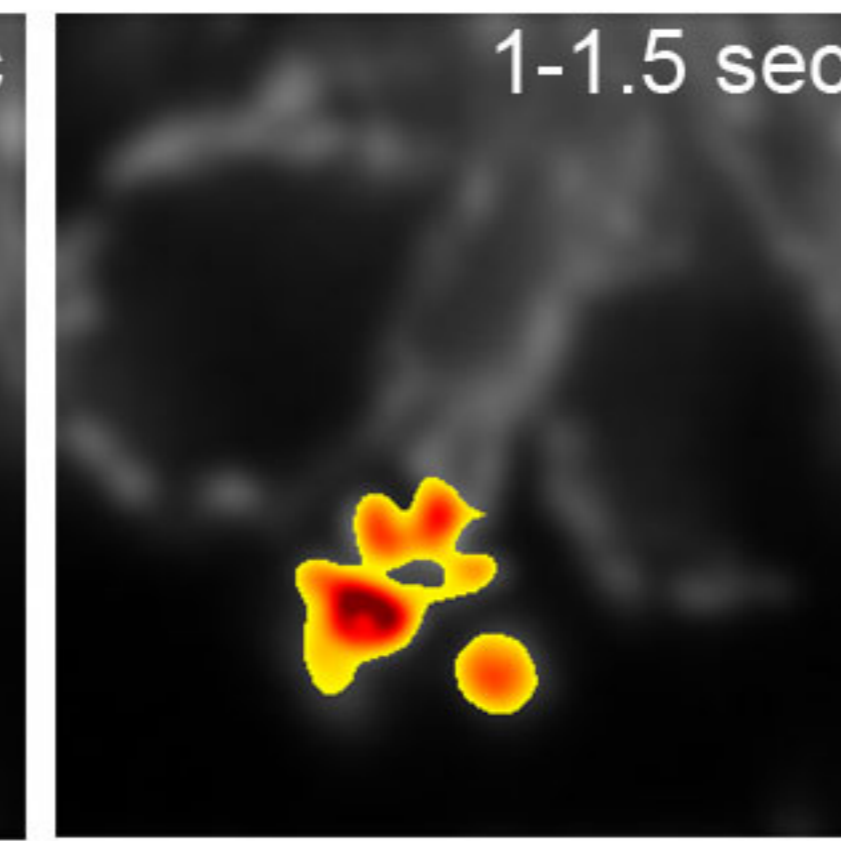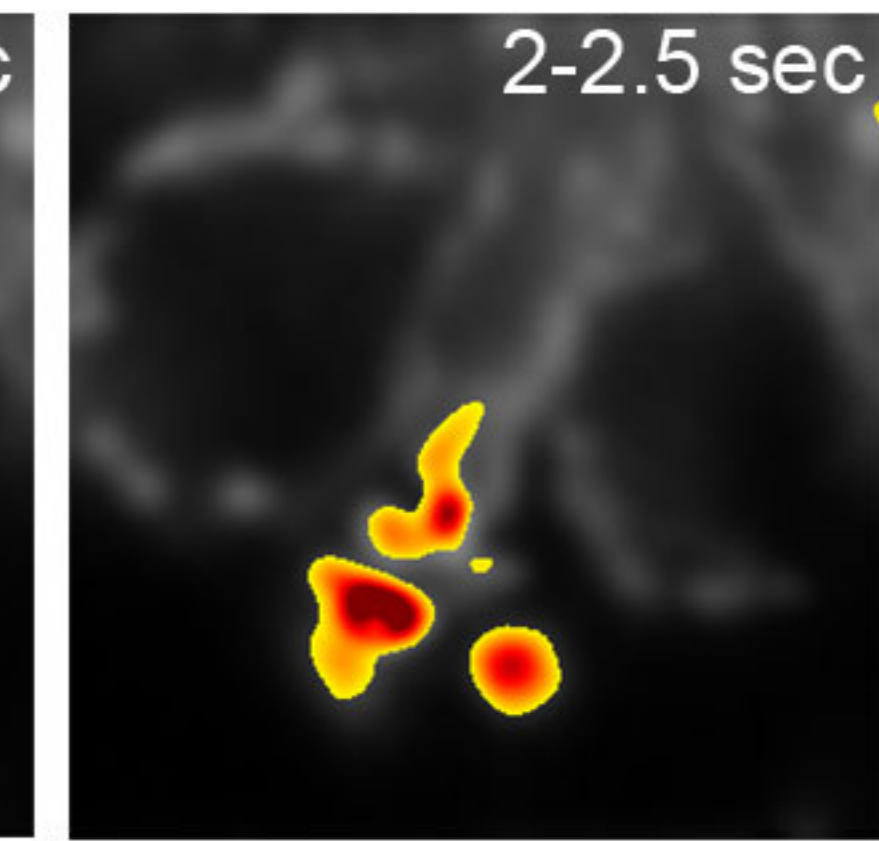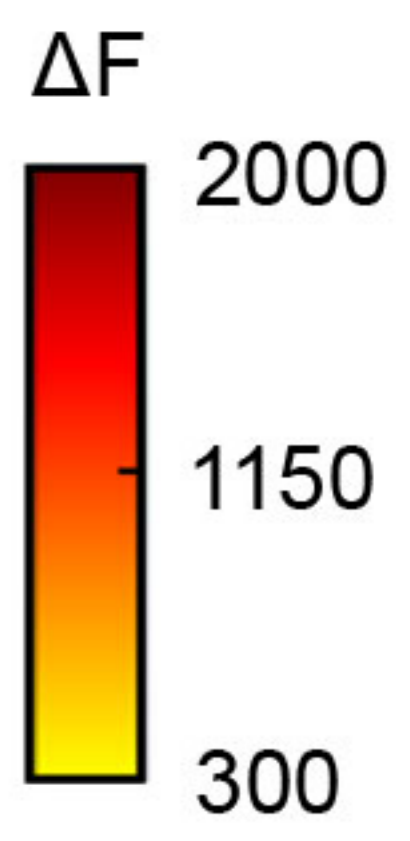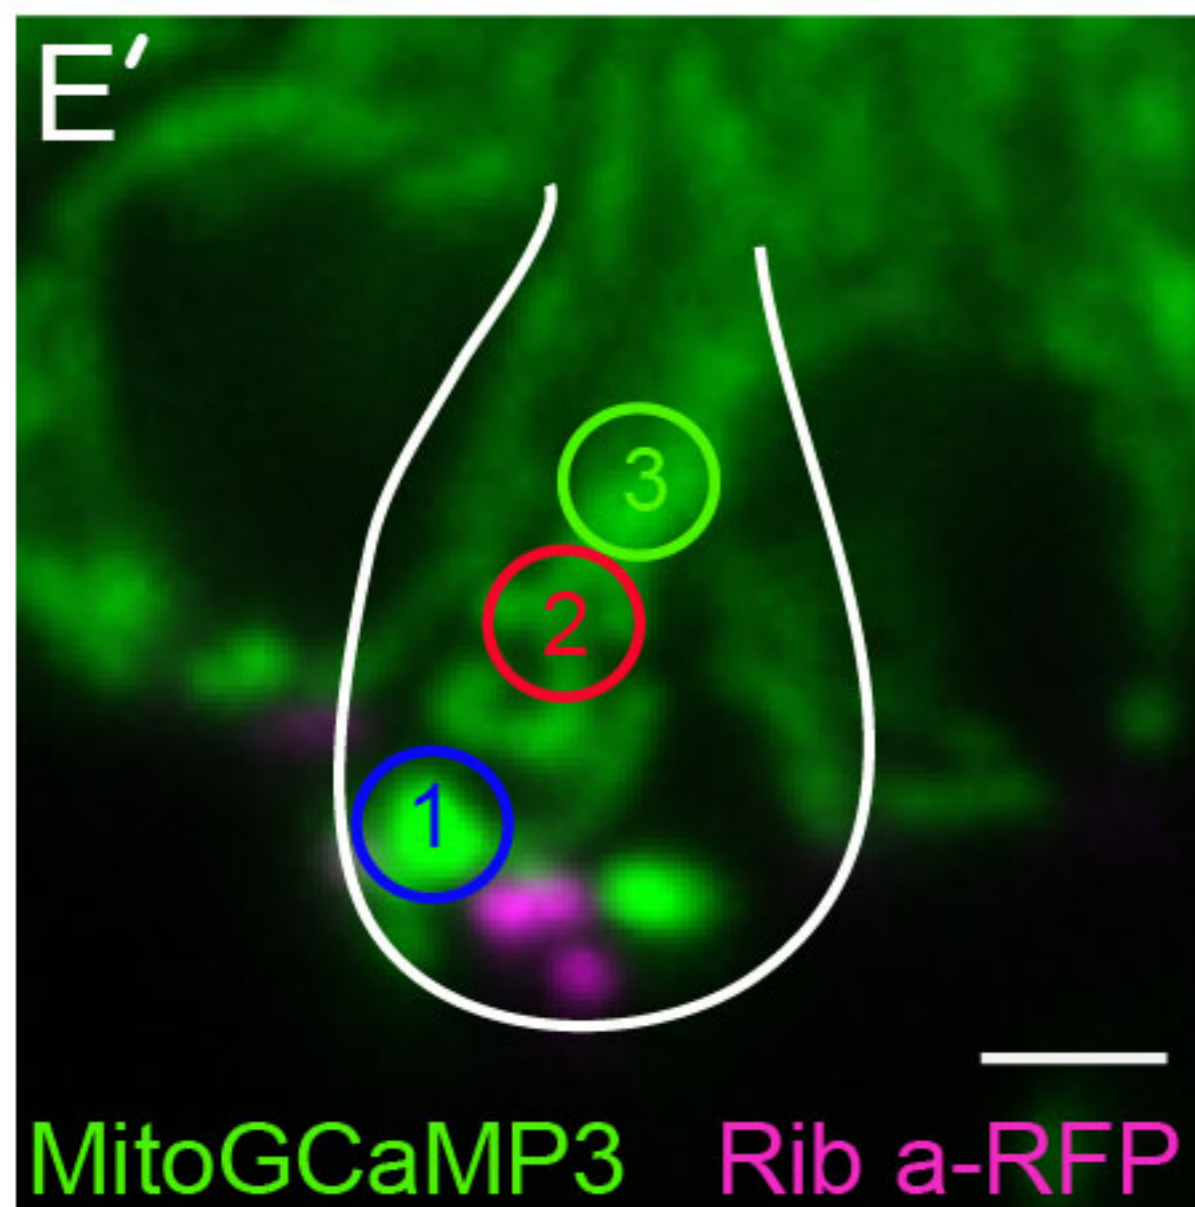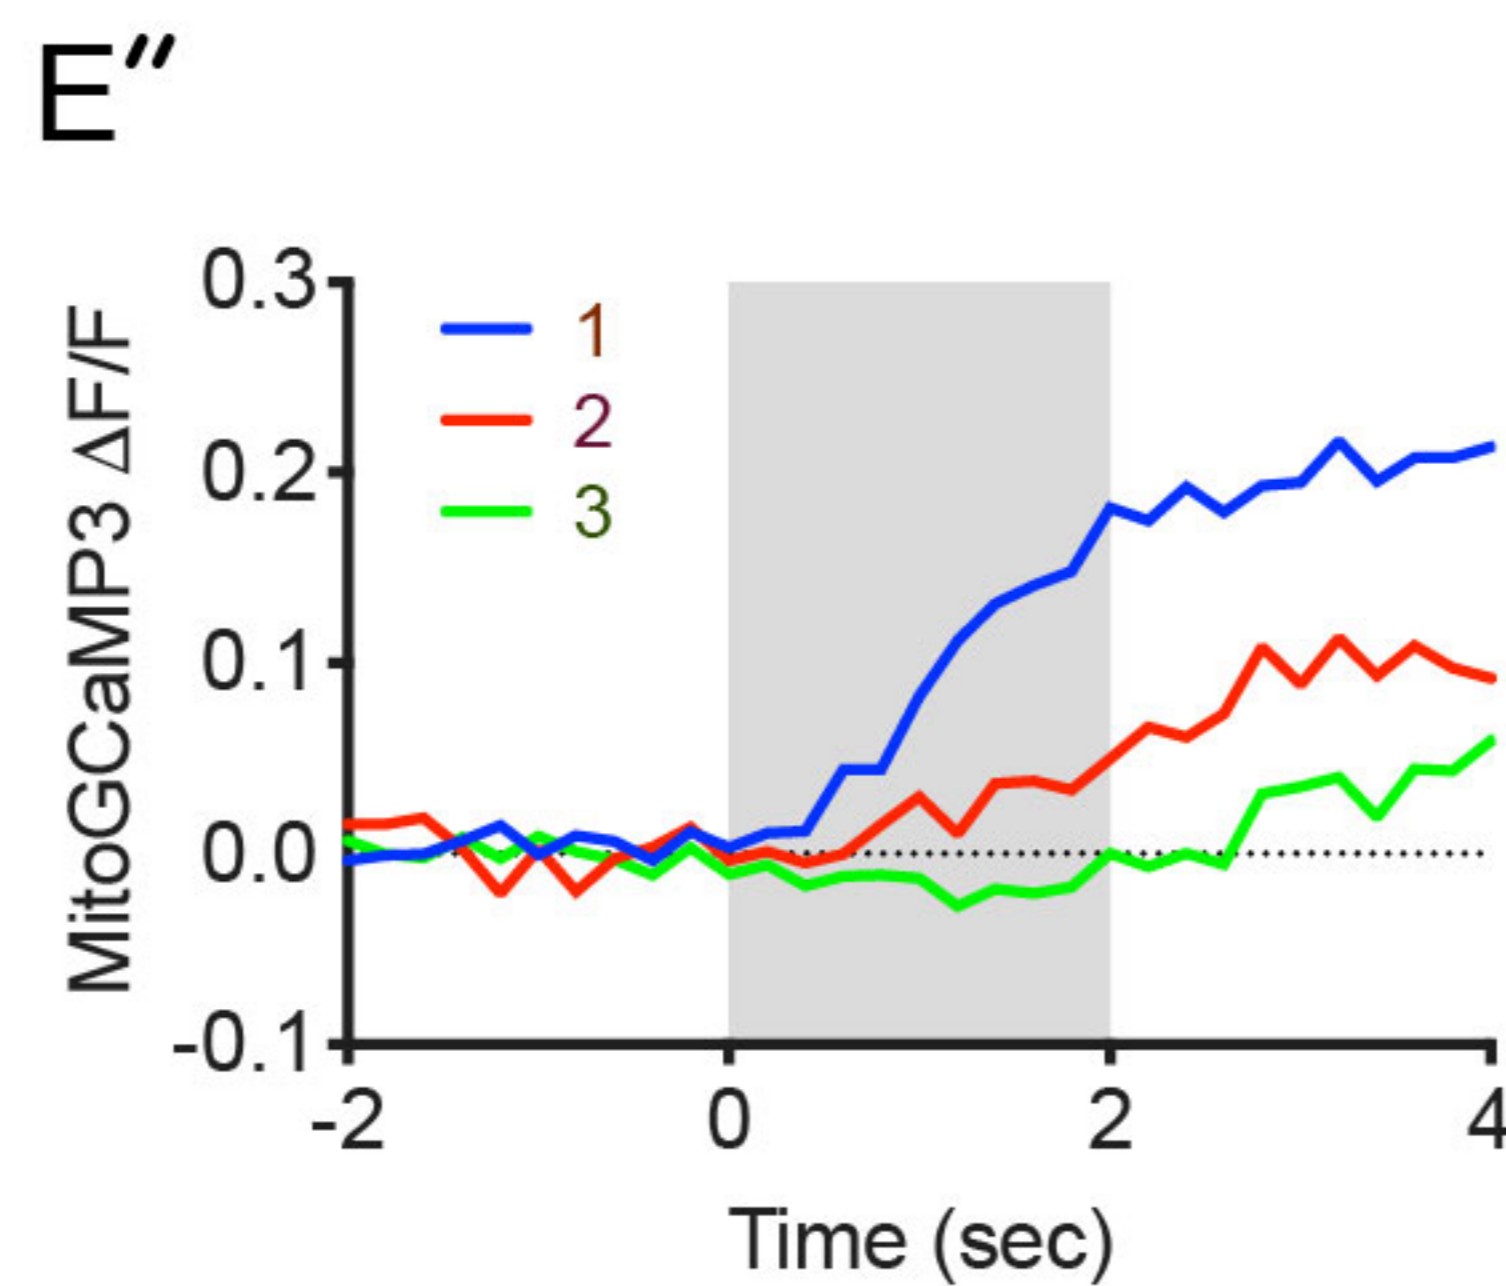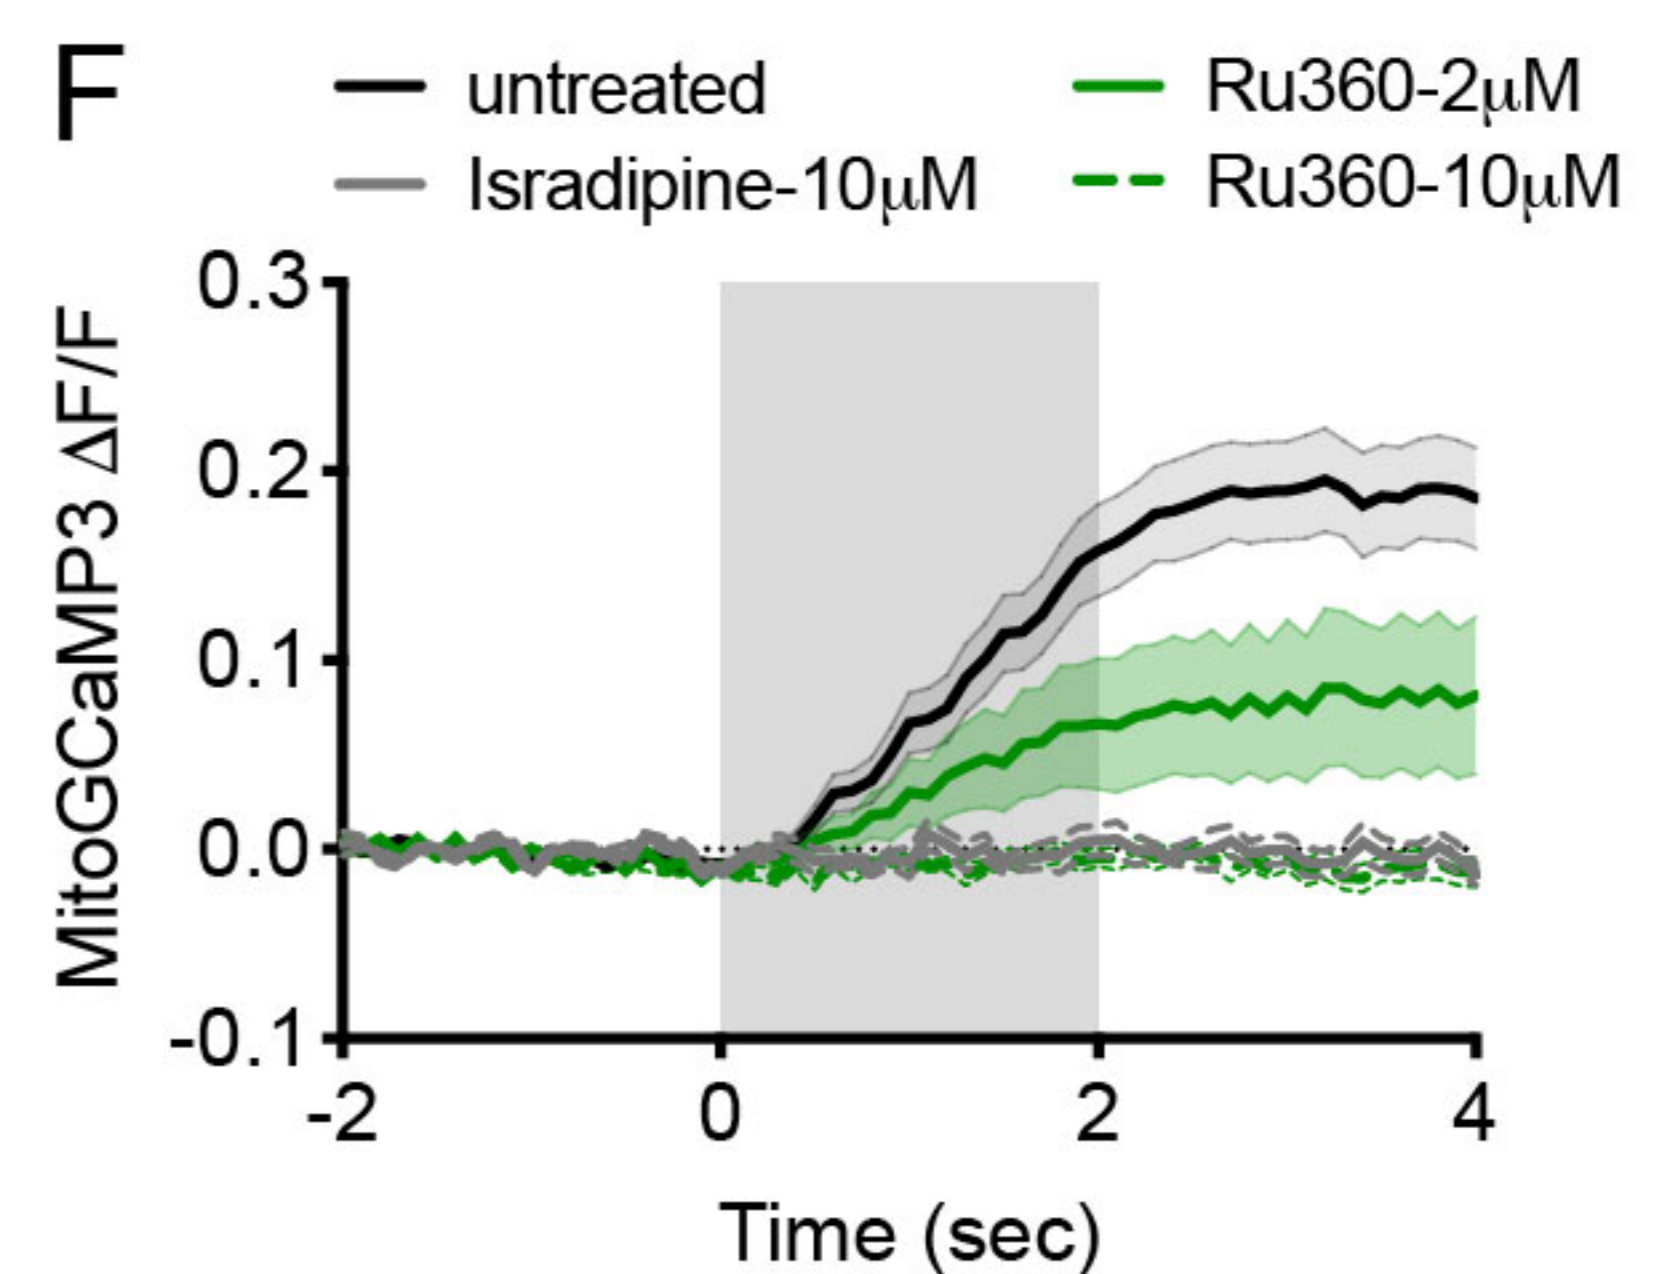

bioRxiv preprint doi: <https://doi.org/10.1101/311011>; this version posted June 10, 2019. The copyright holder for this preprint (which was not certified by peer review) is the author/funder, who has granted bioRxiv a license to display the preprint in perpetuity. It is made available under aCC-BY 4.0 International license.

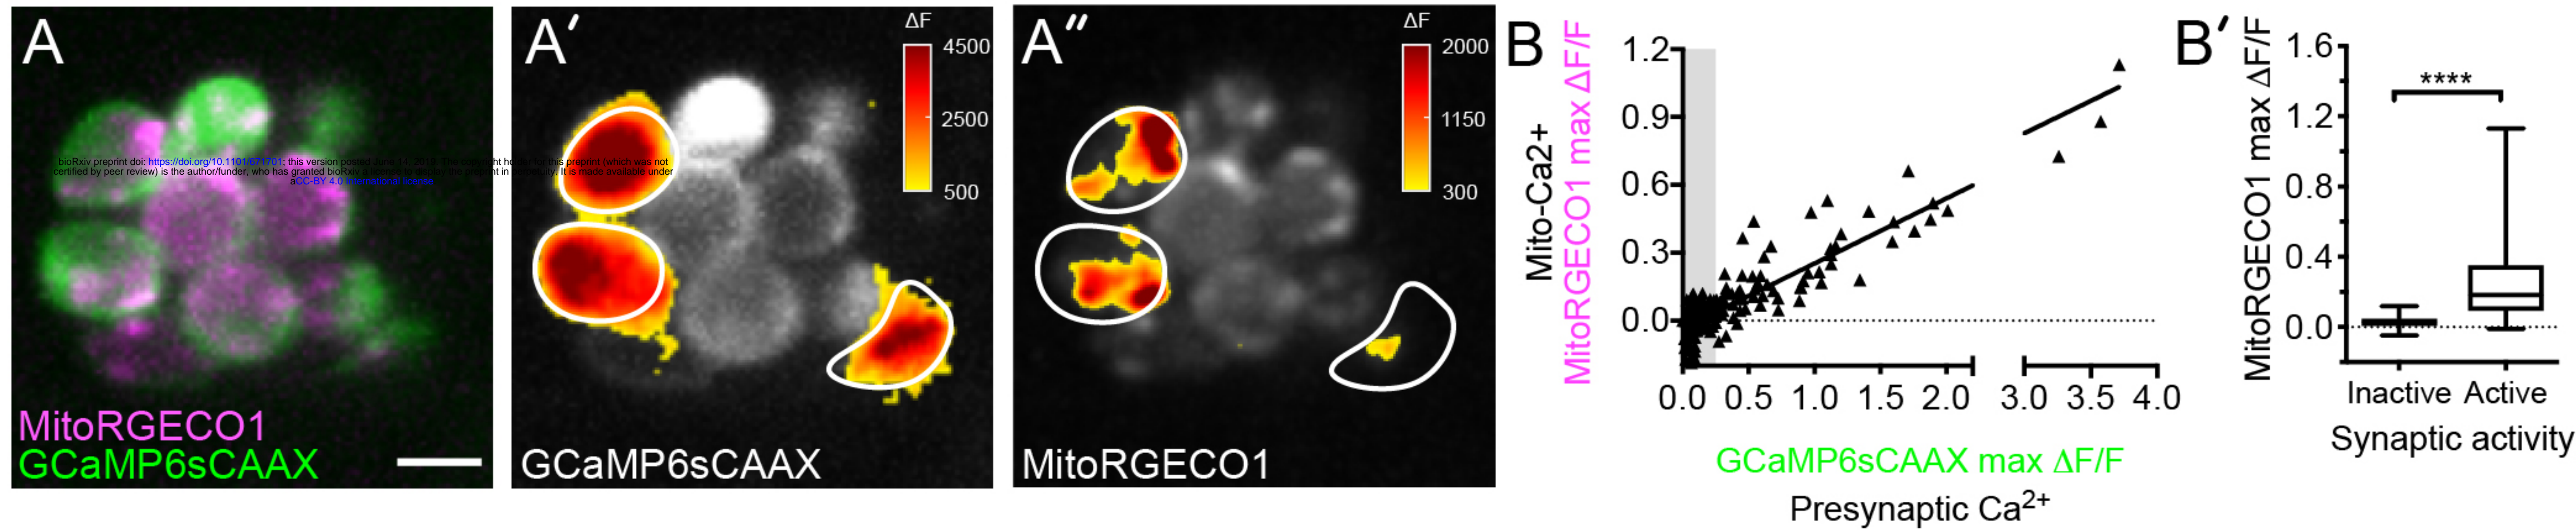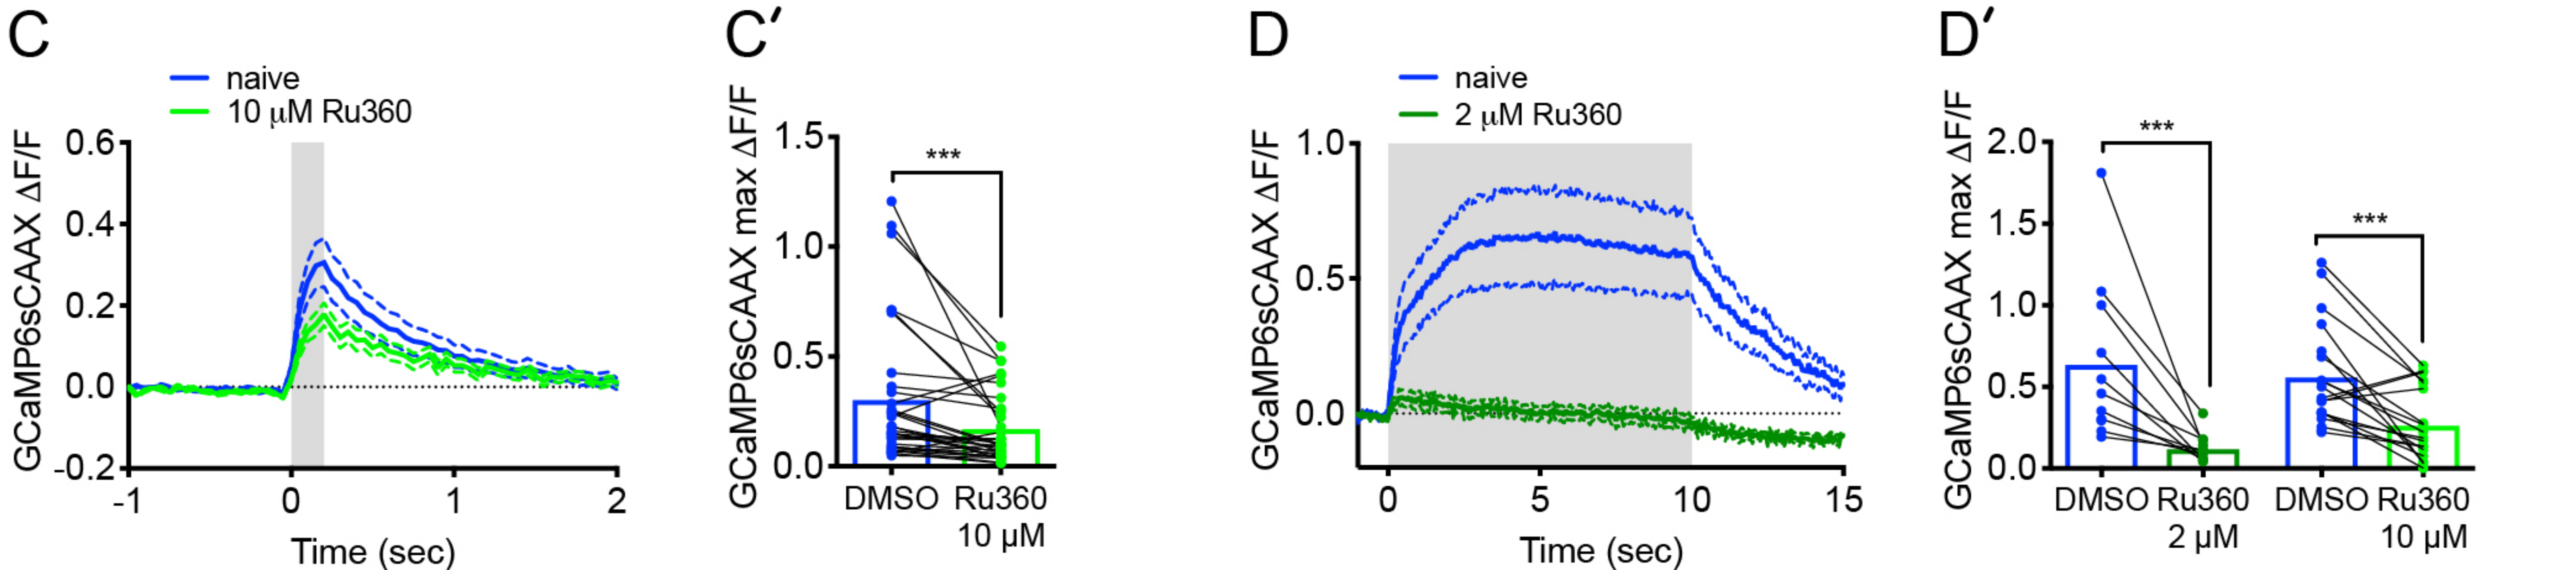

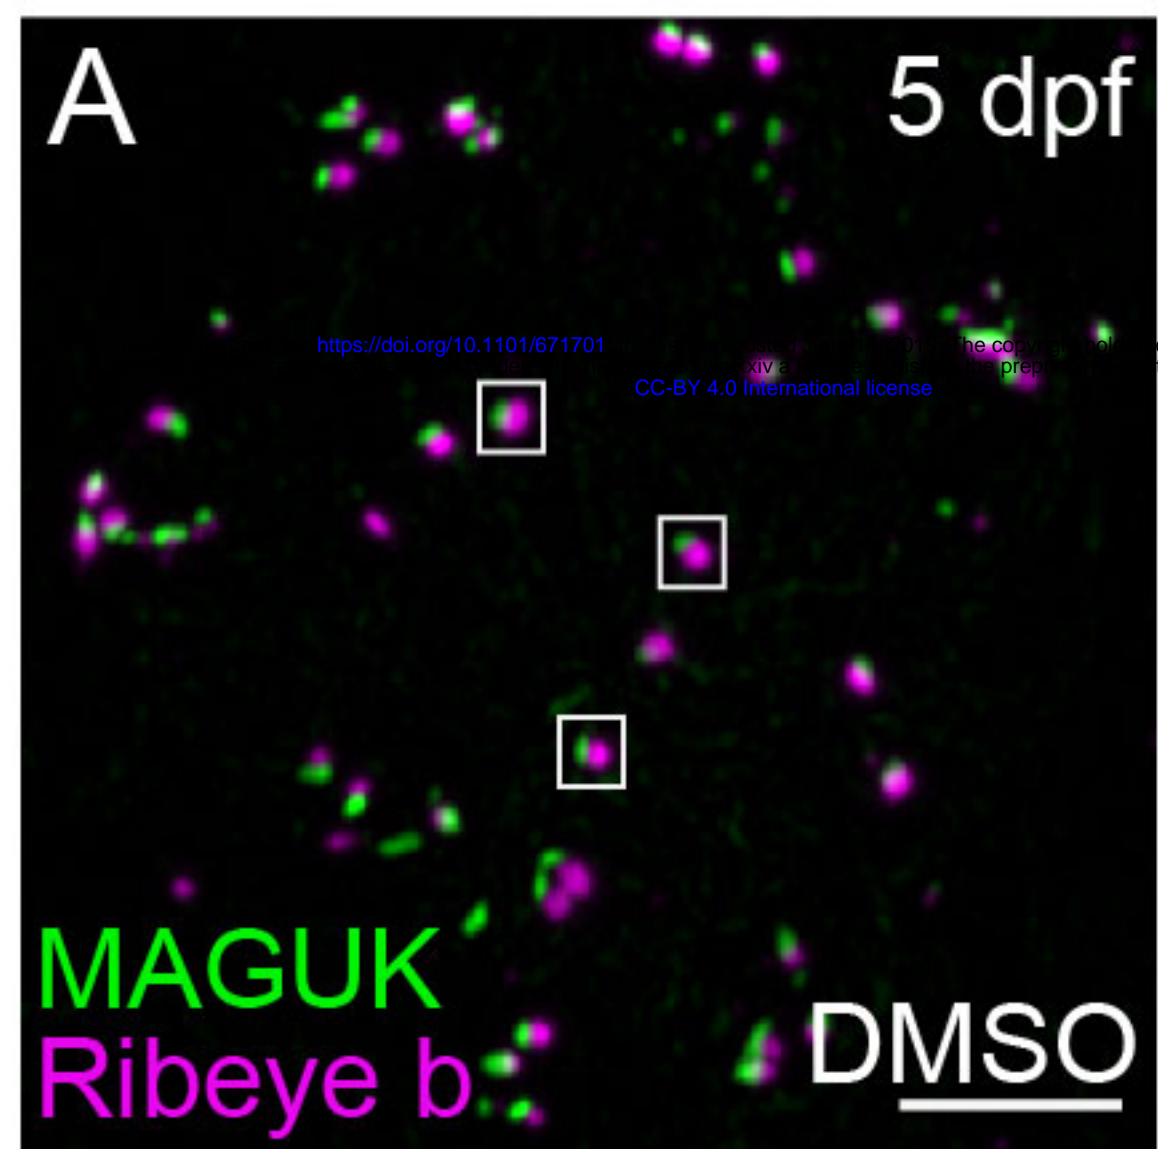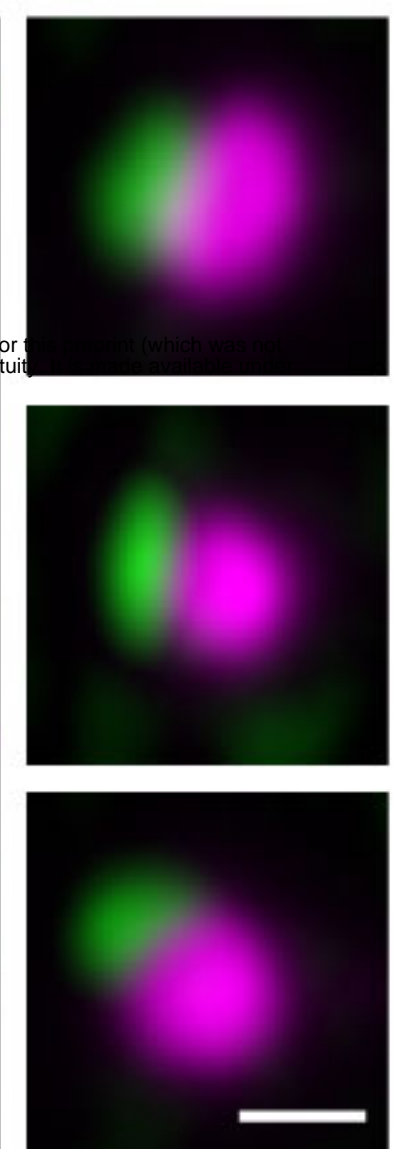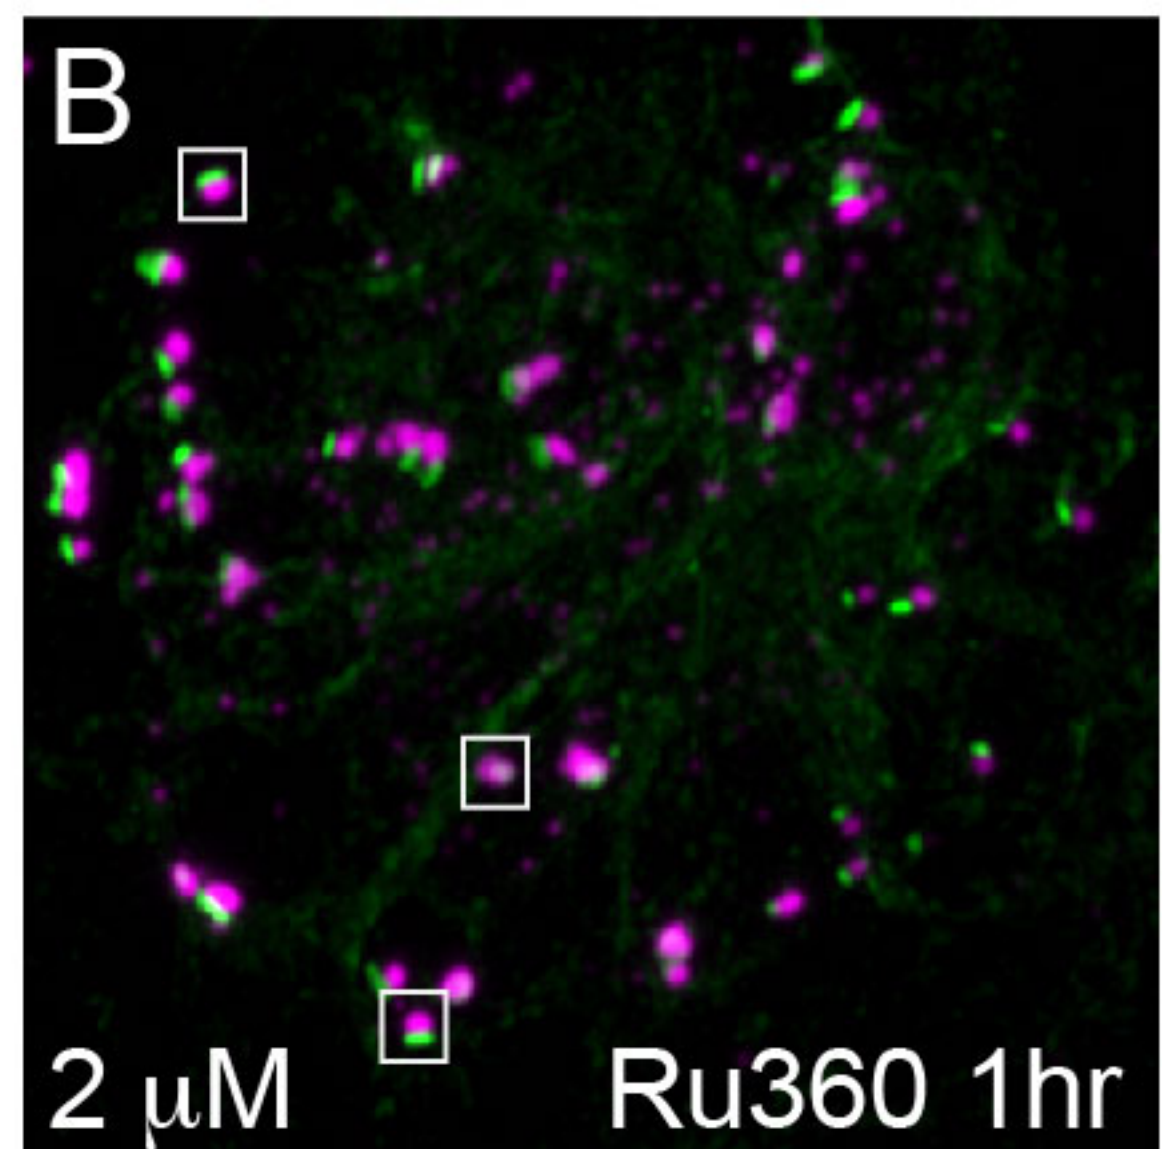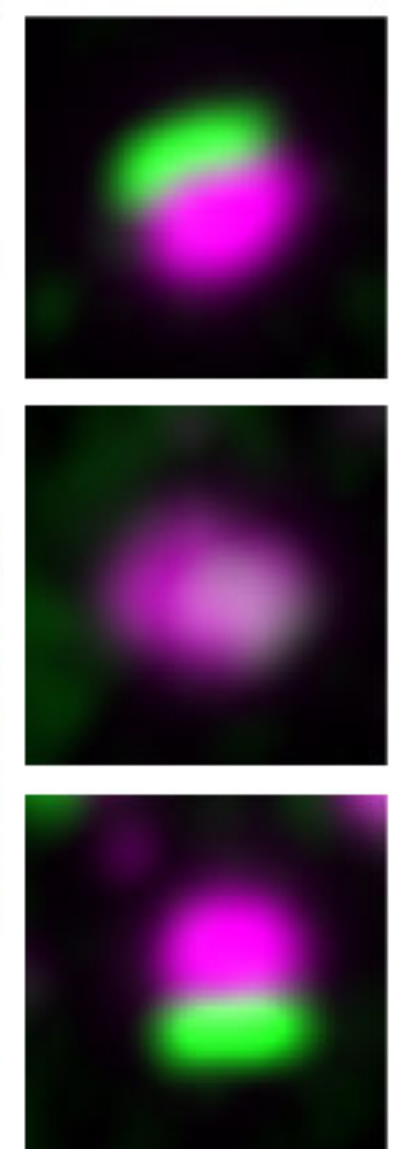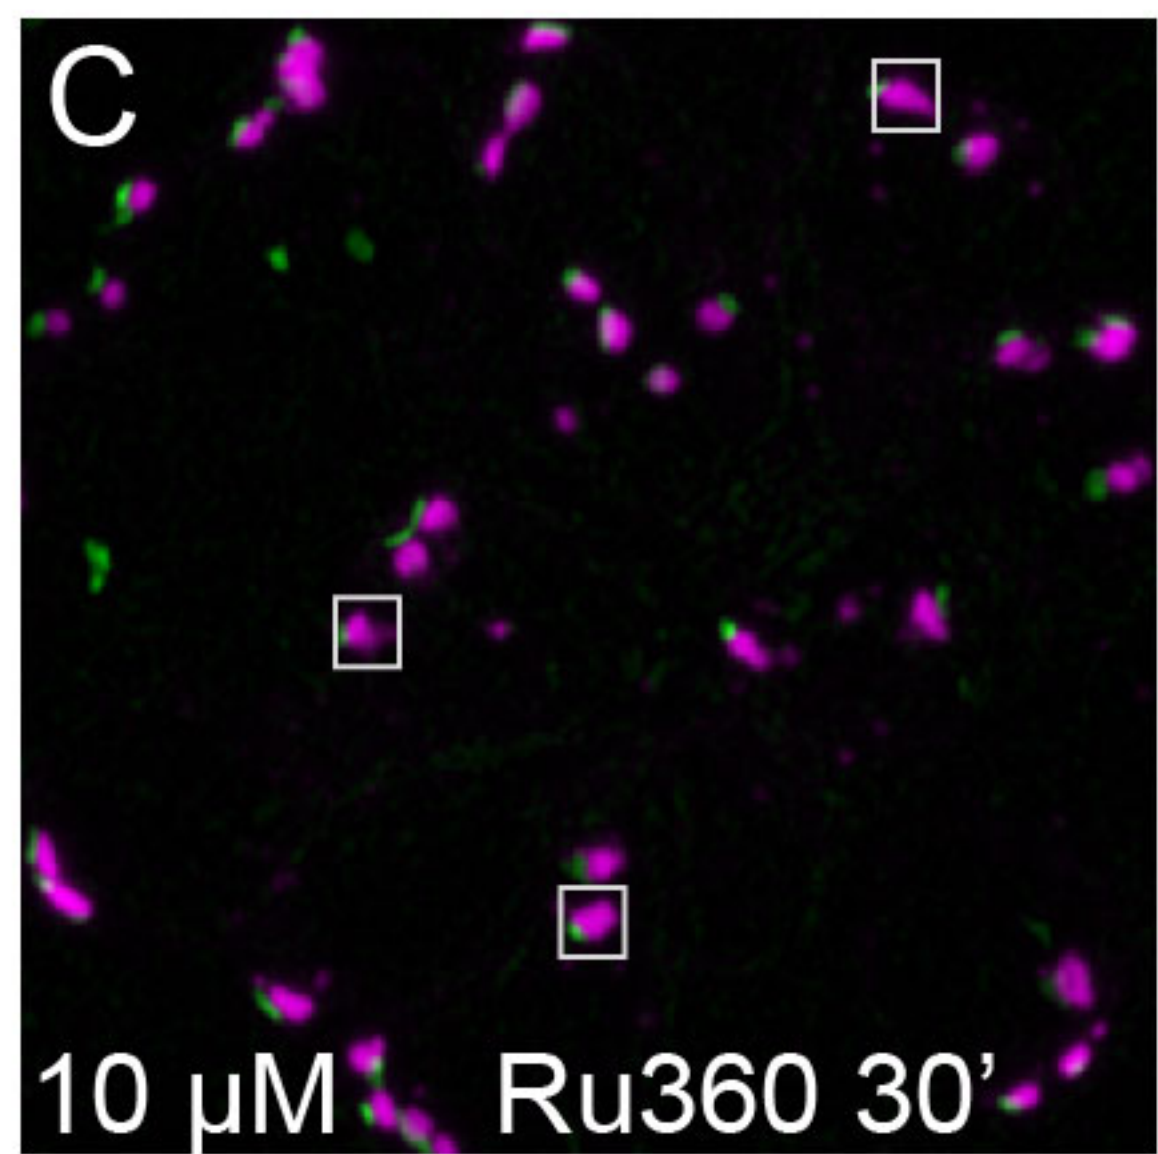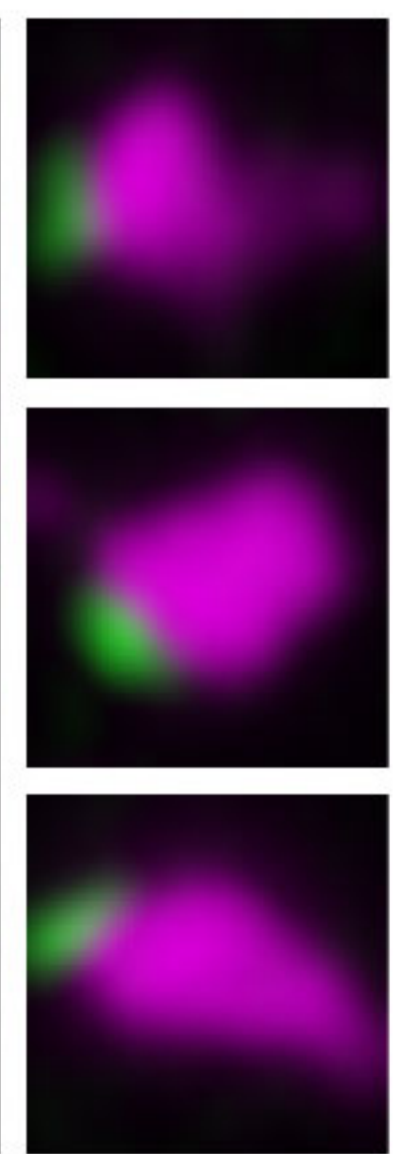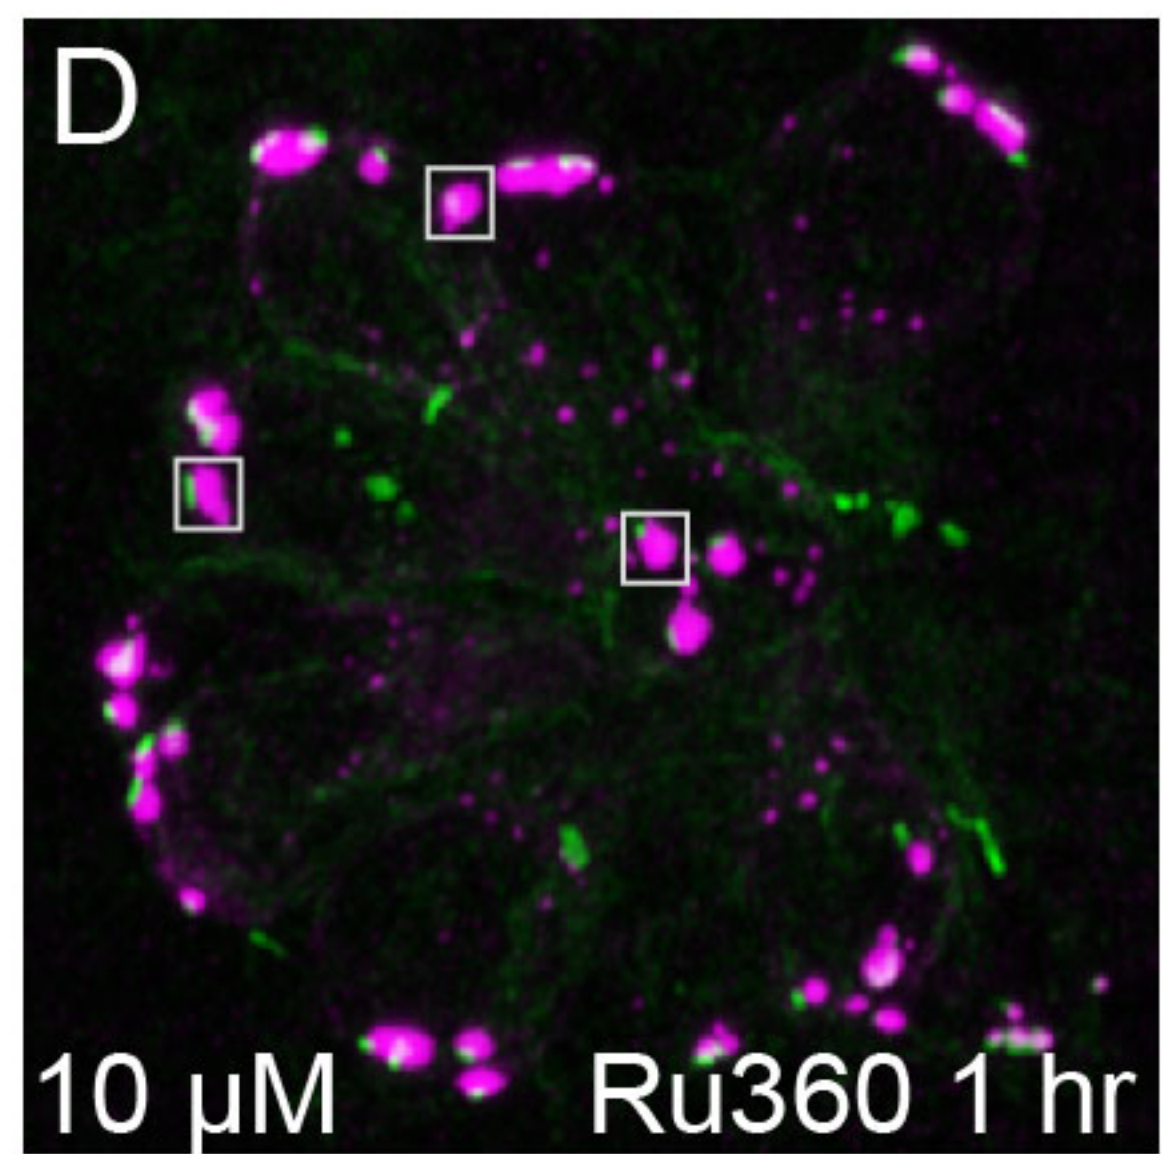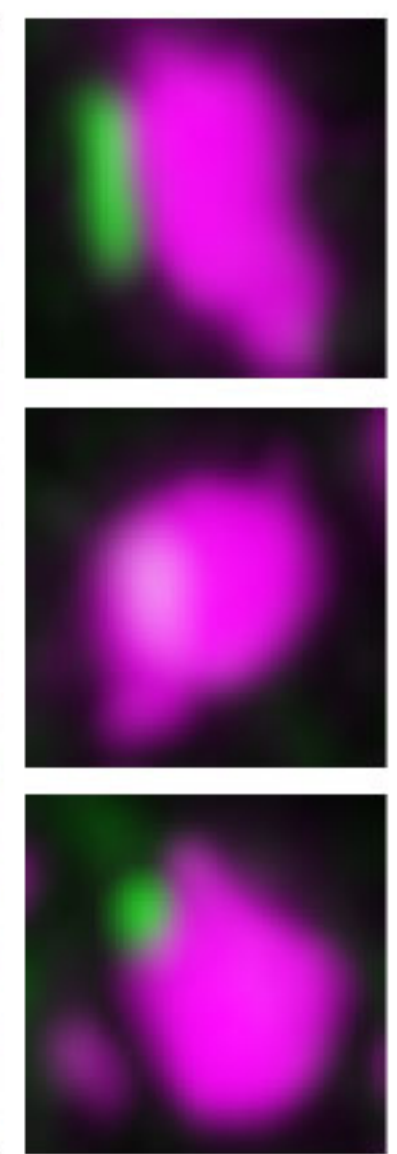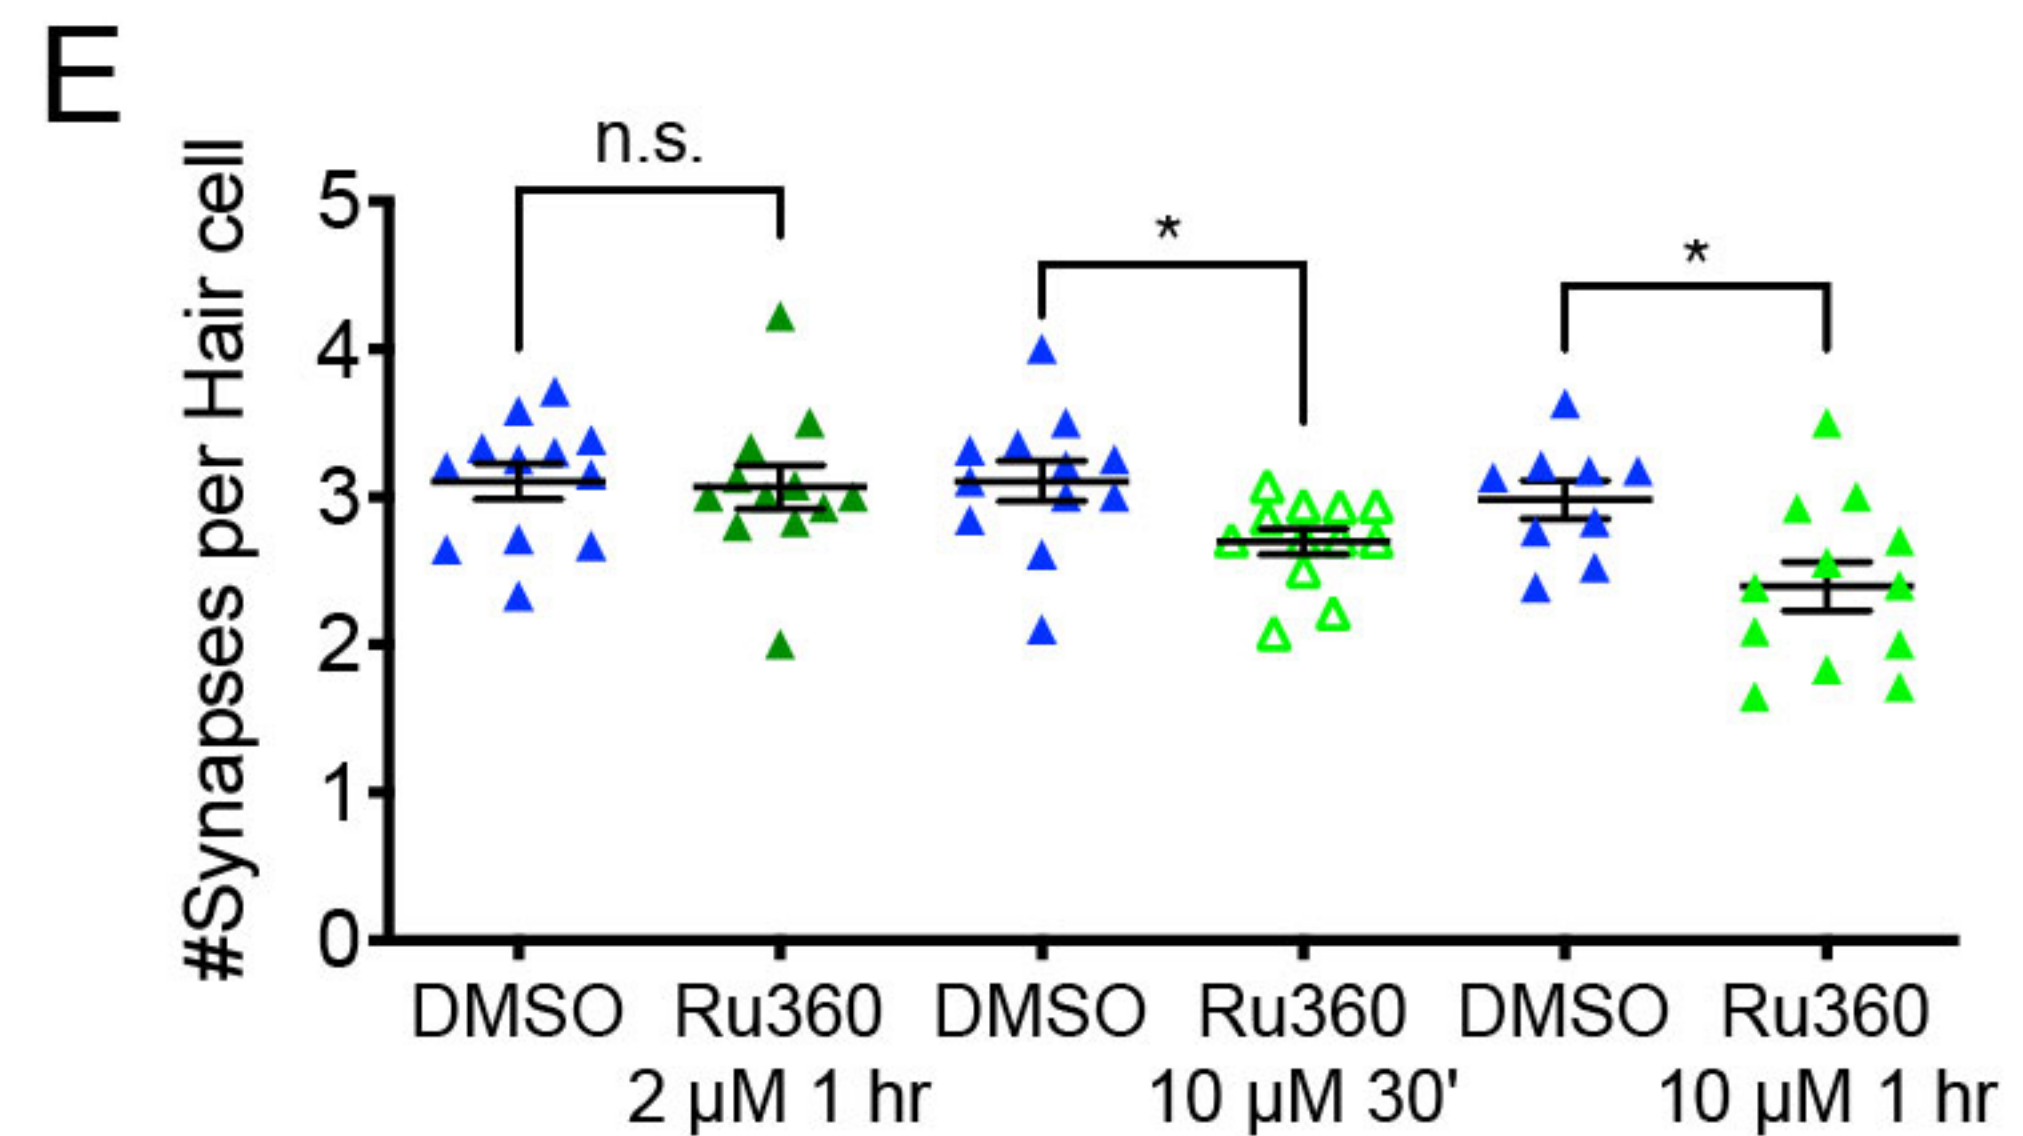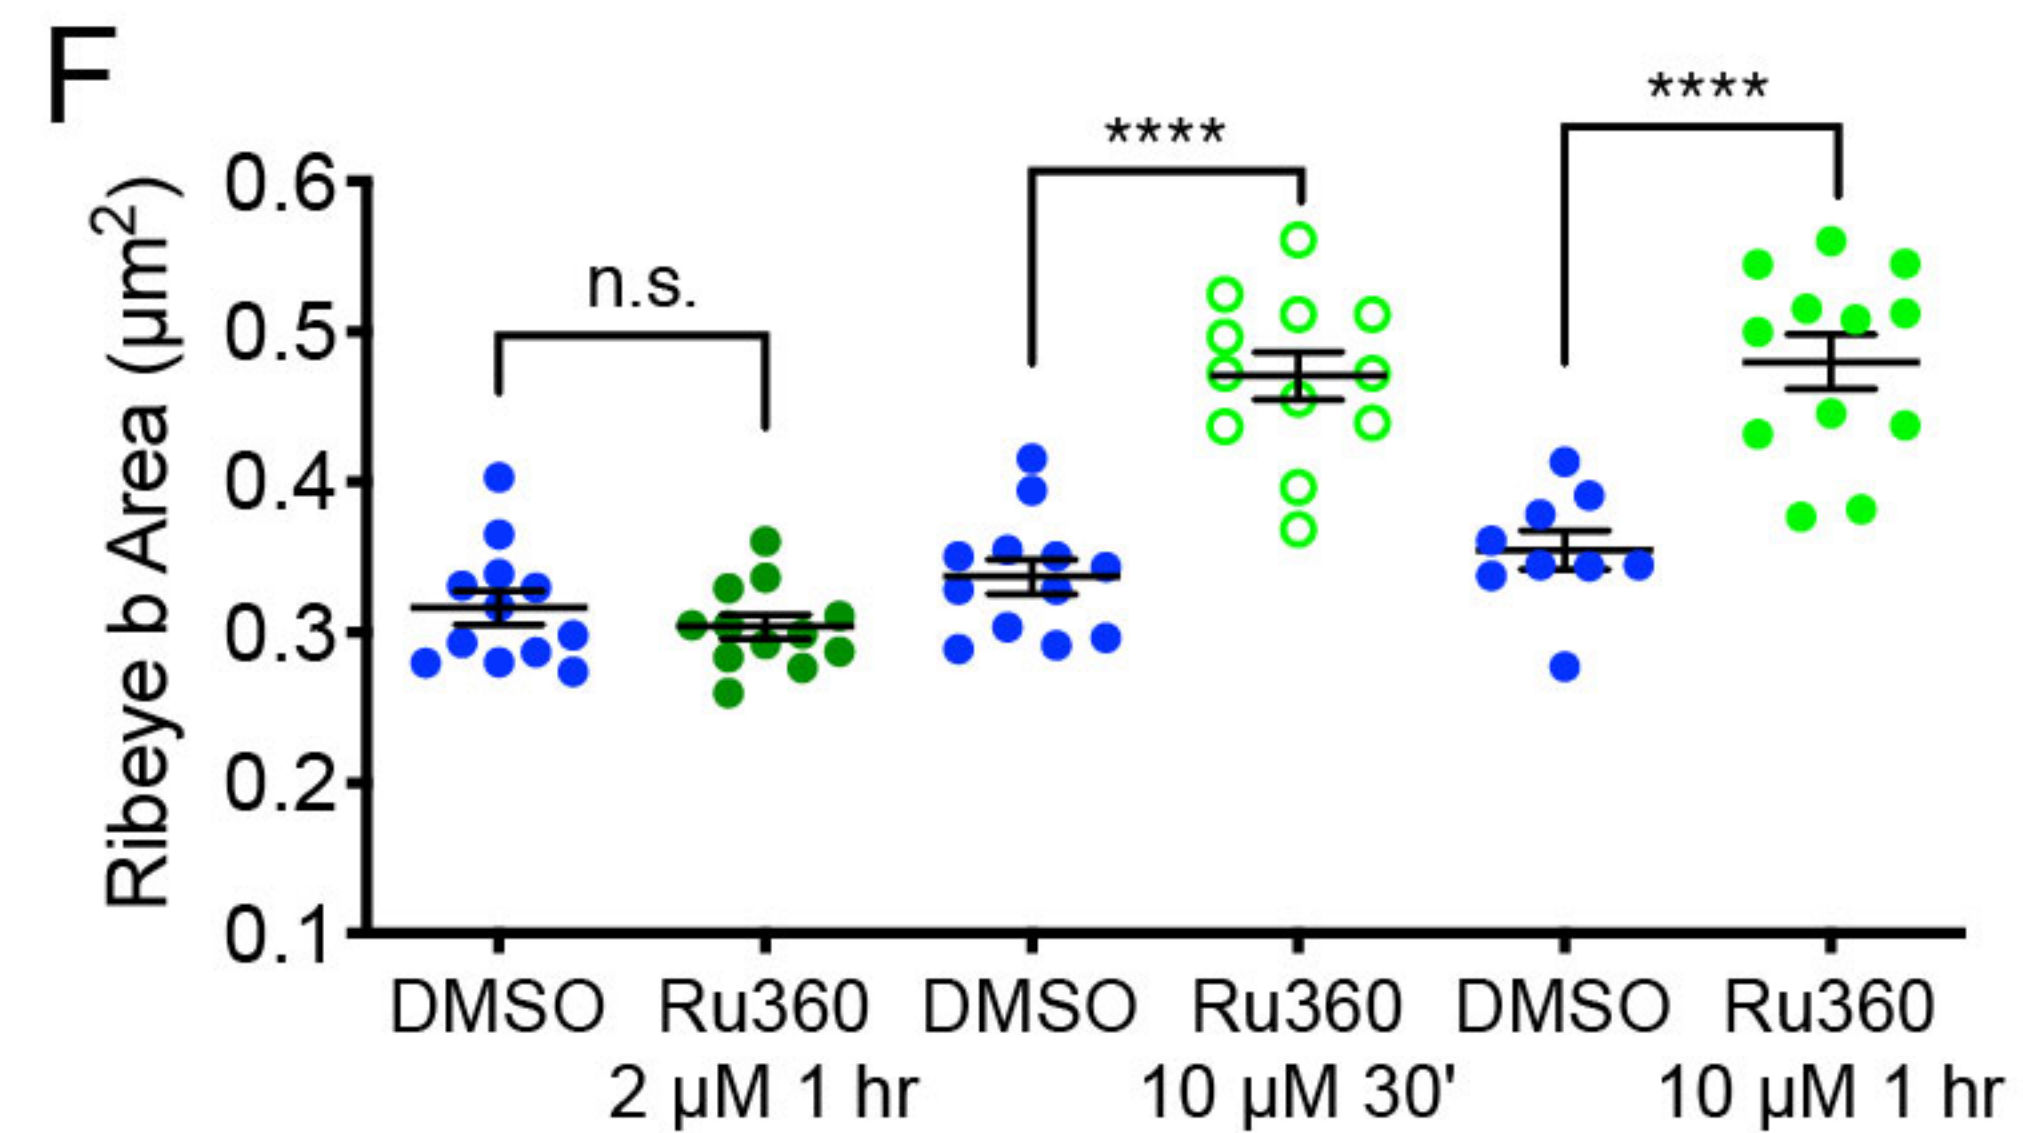

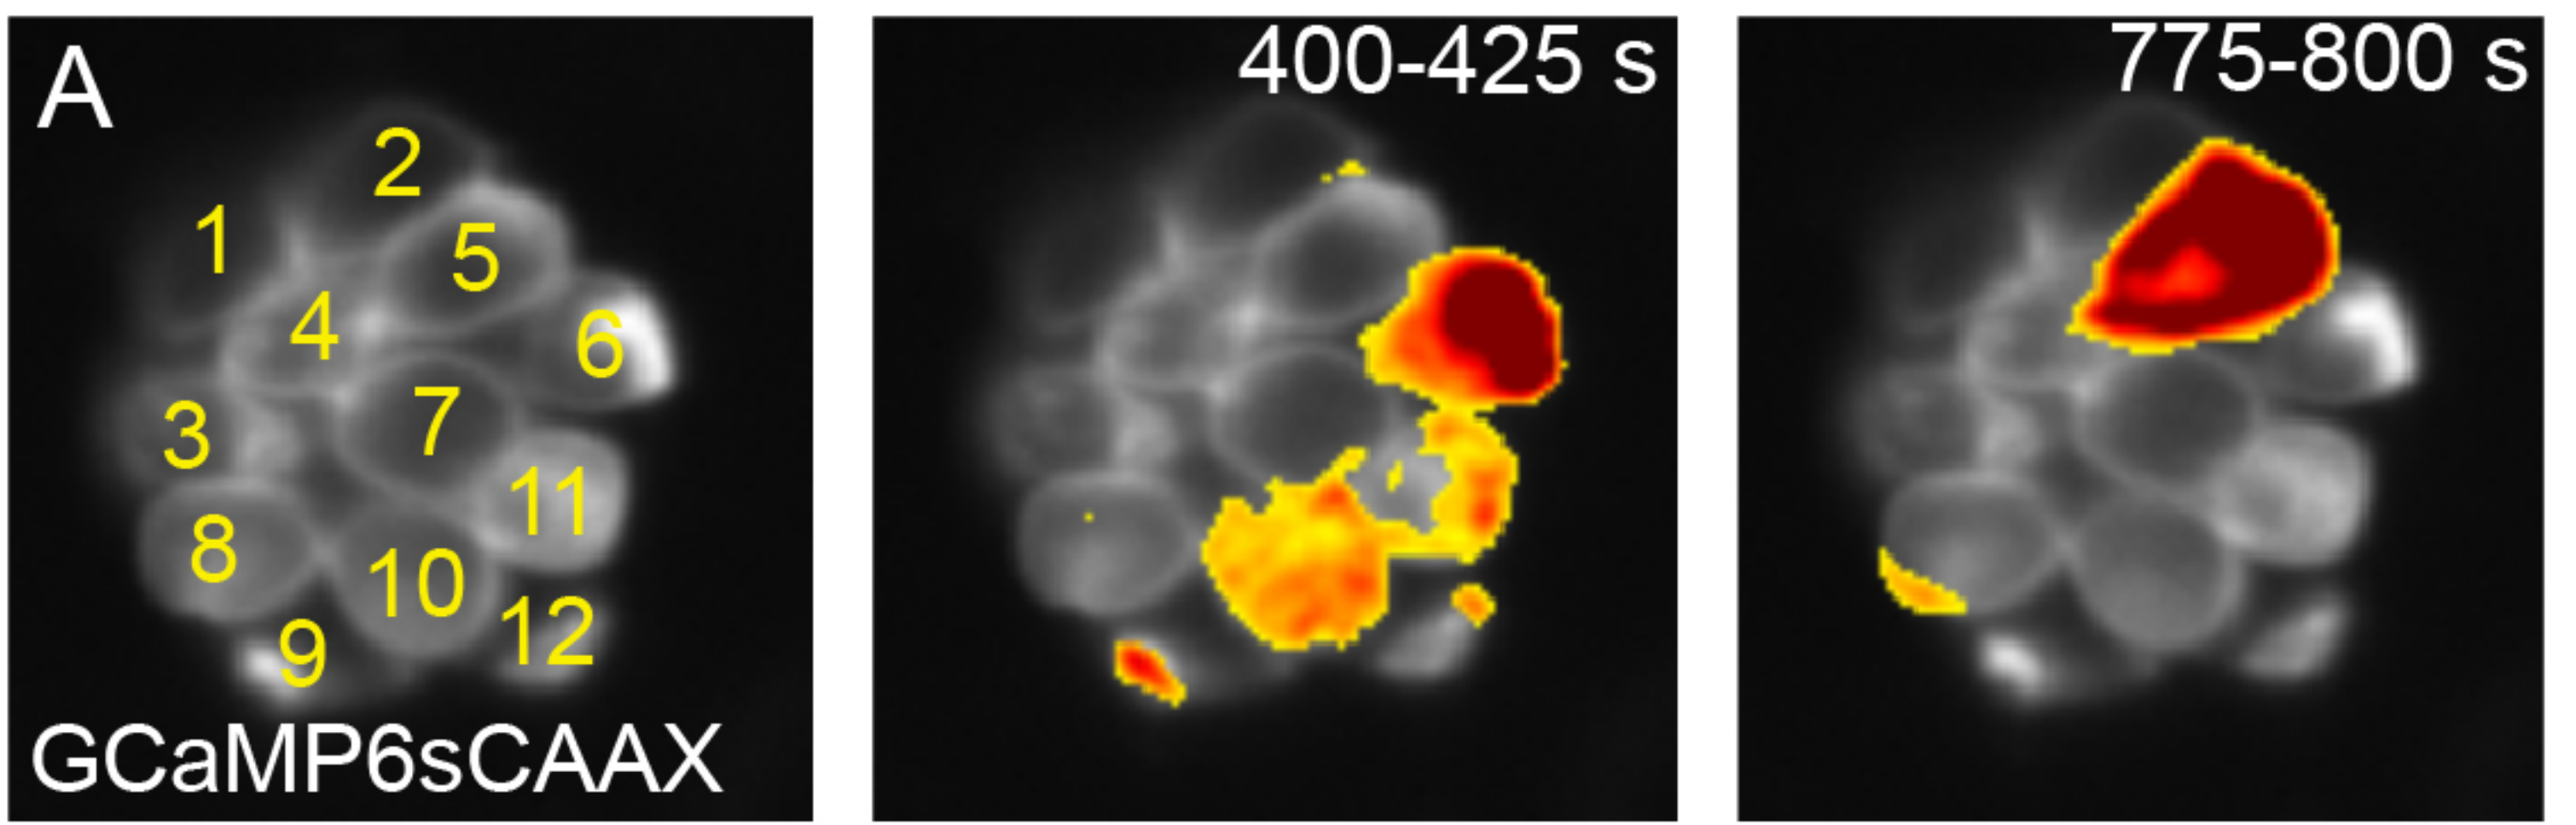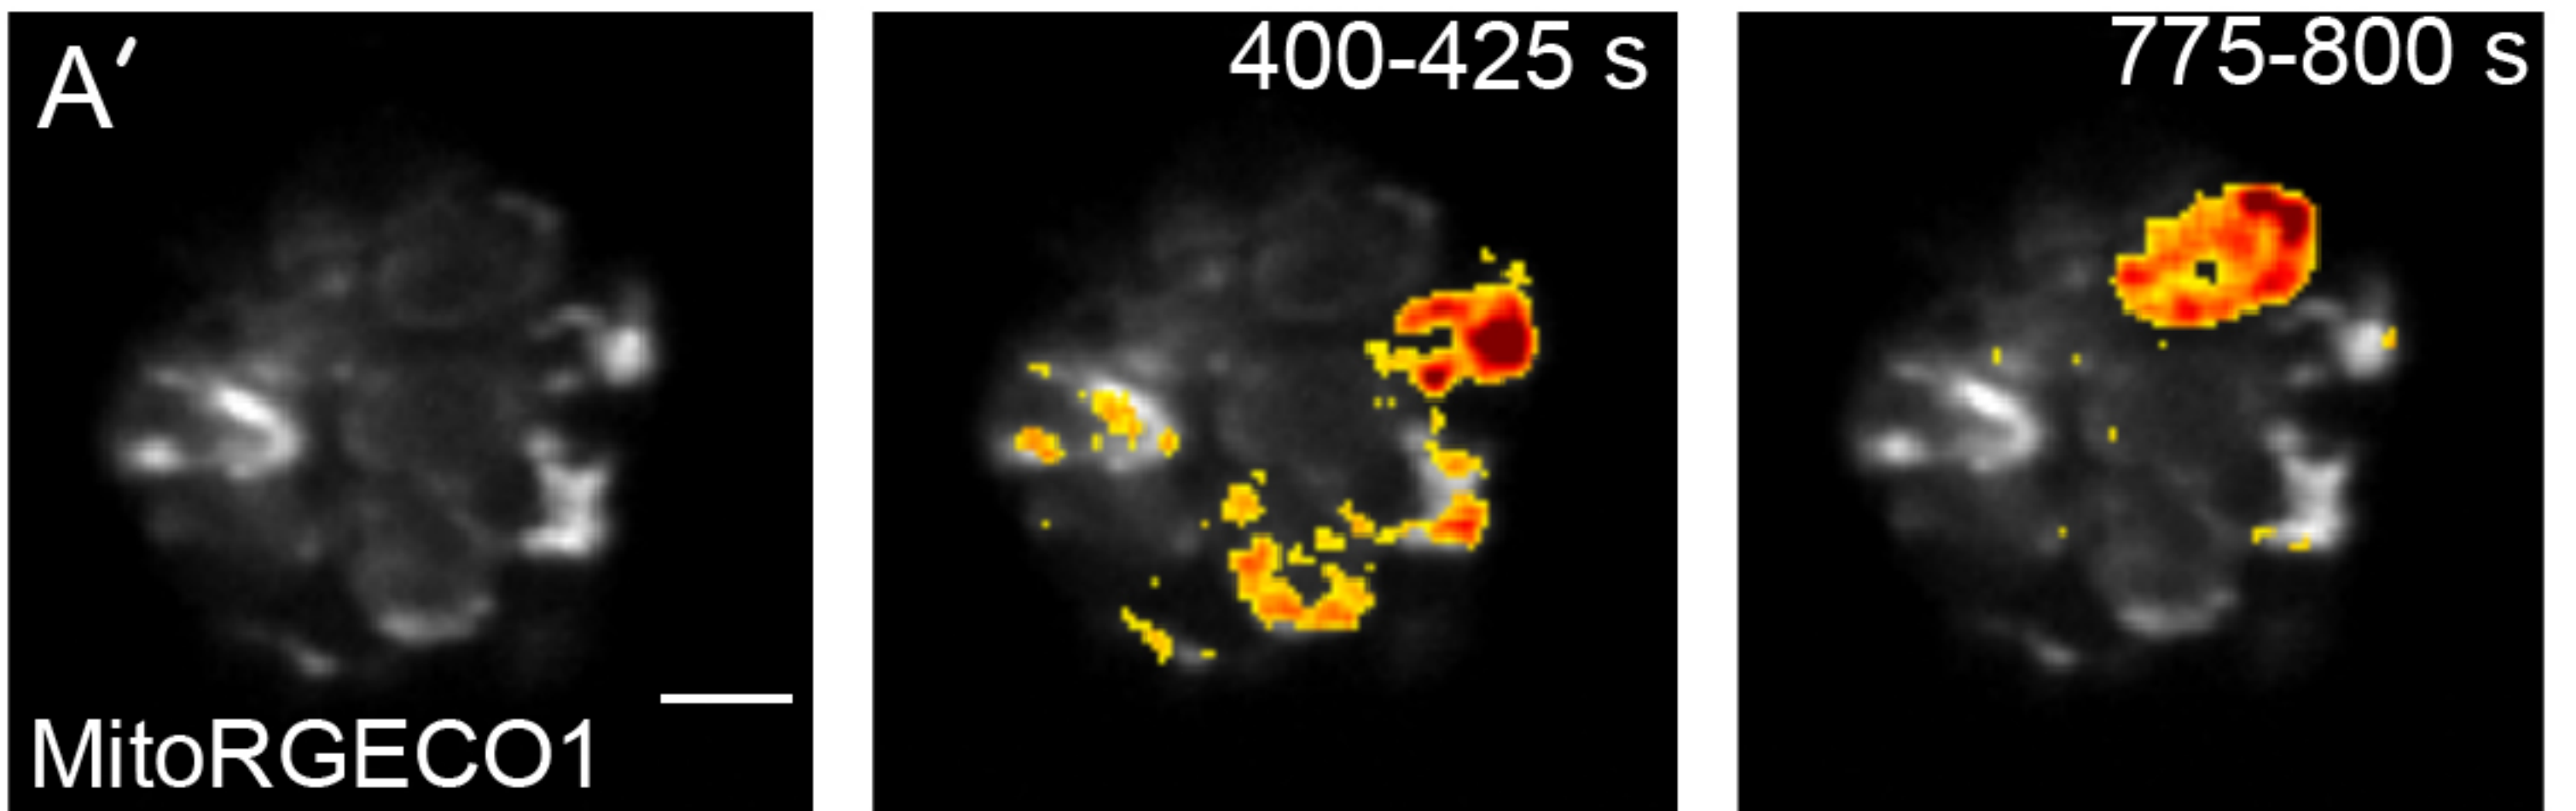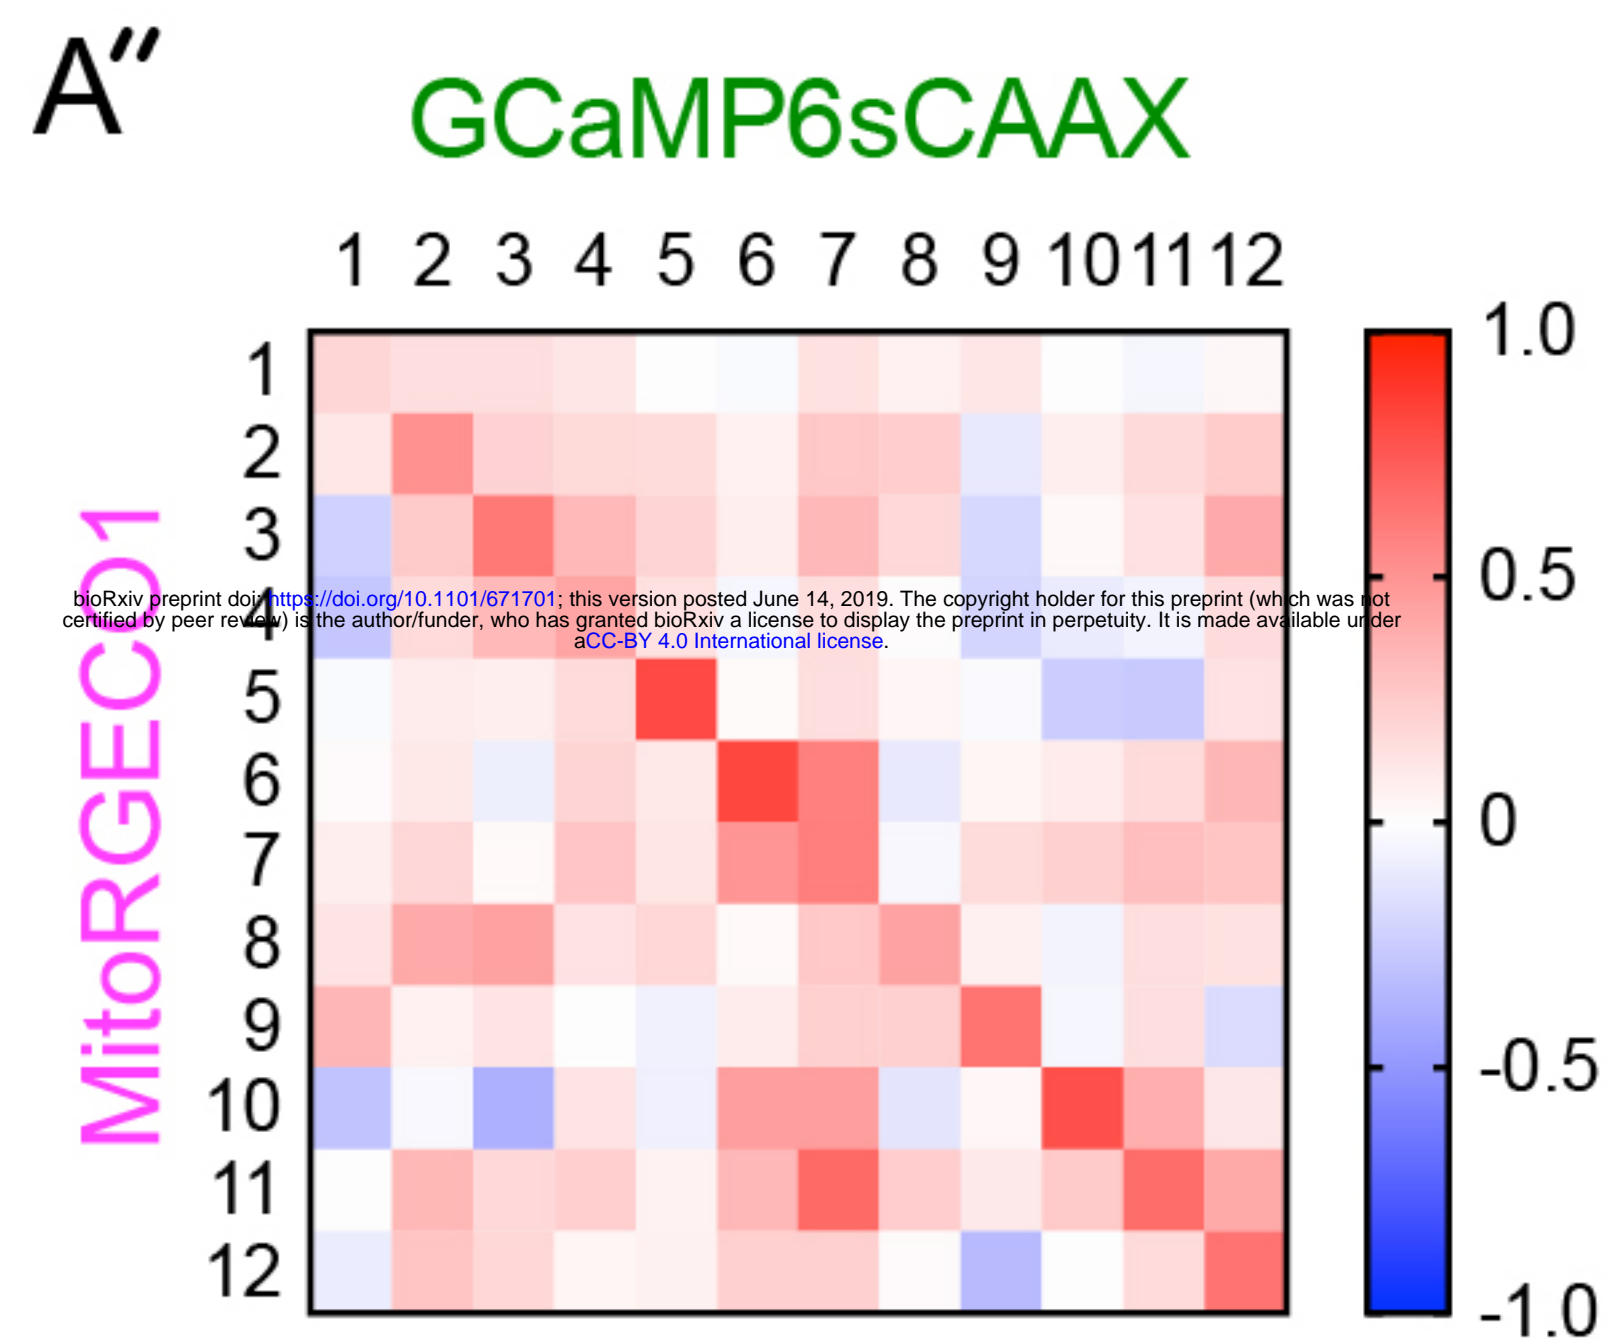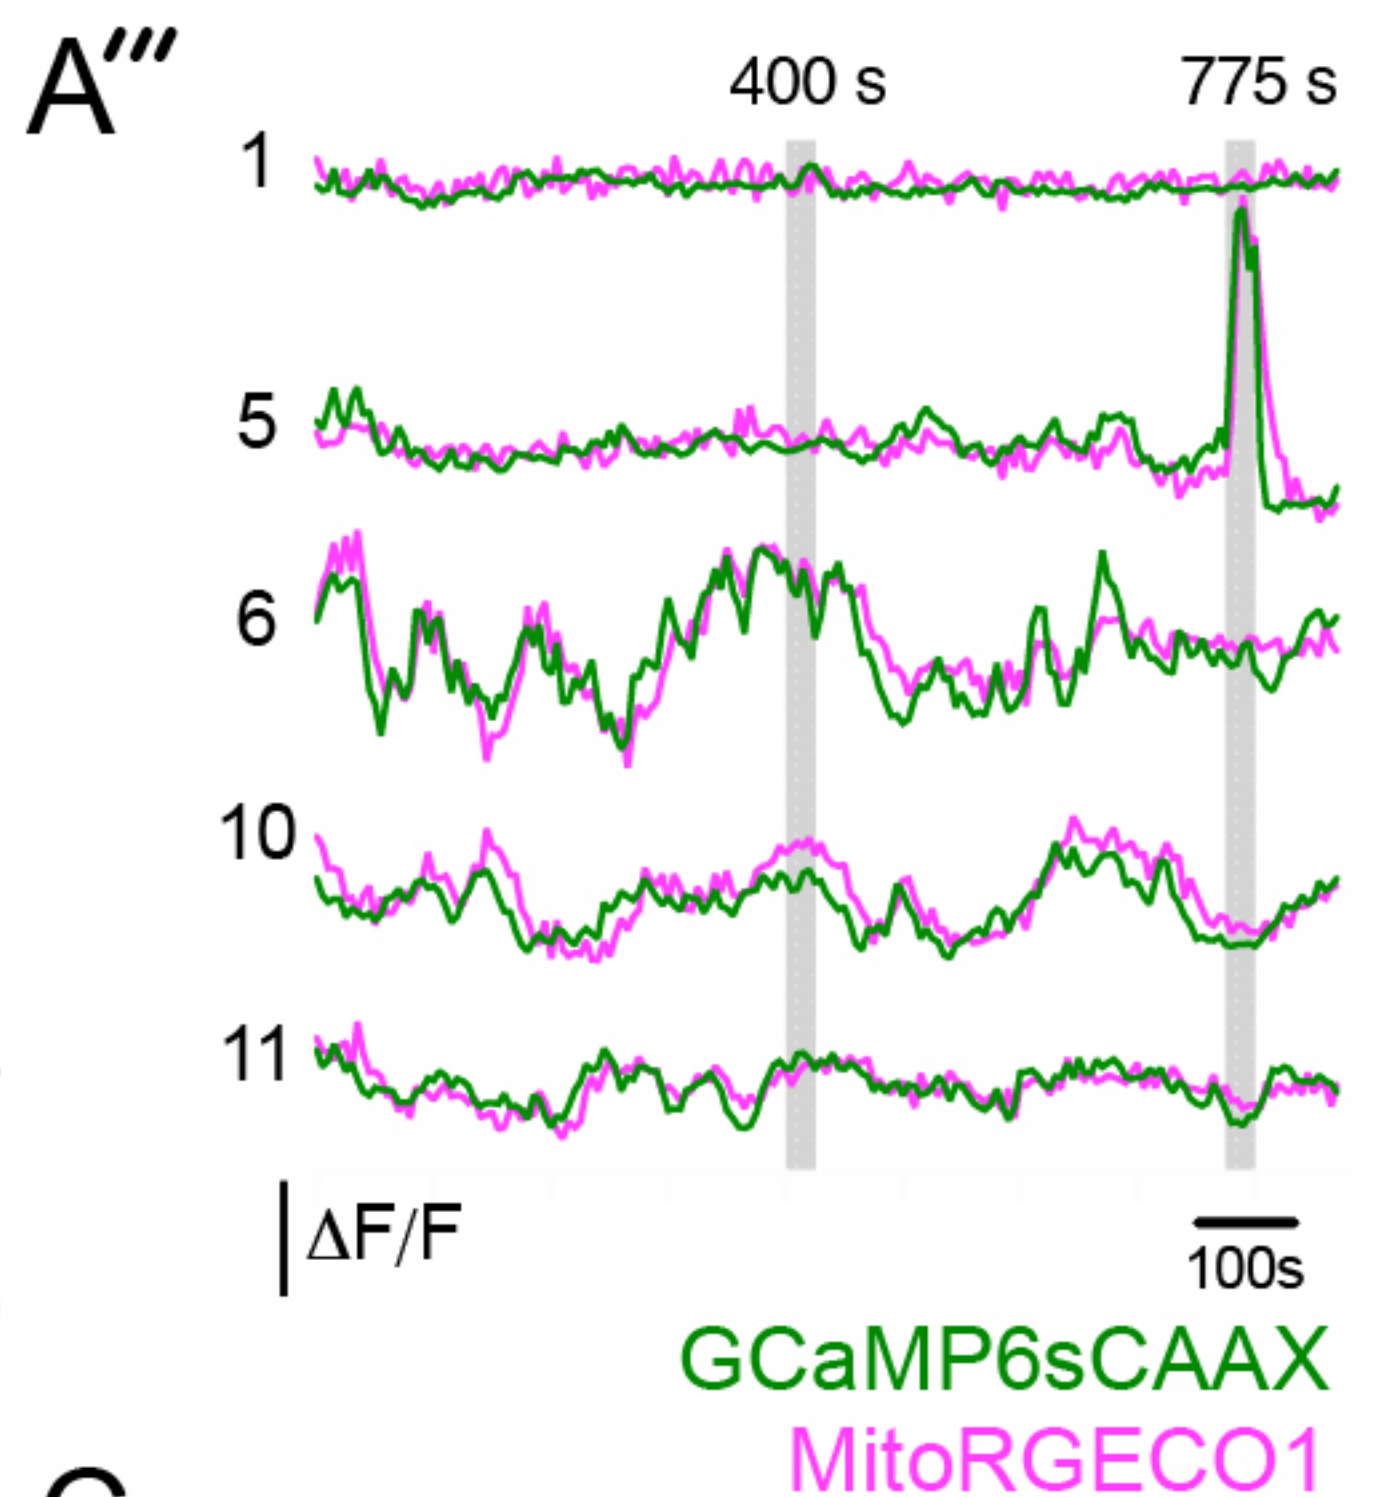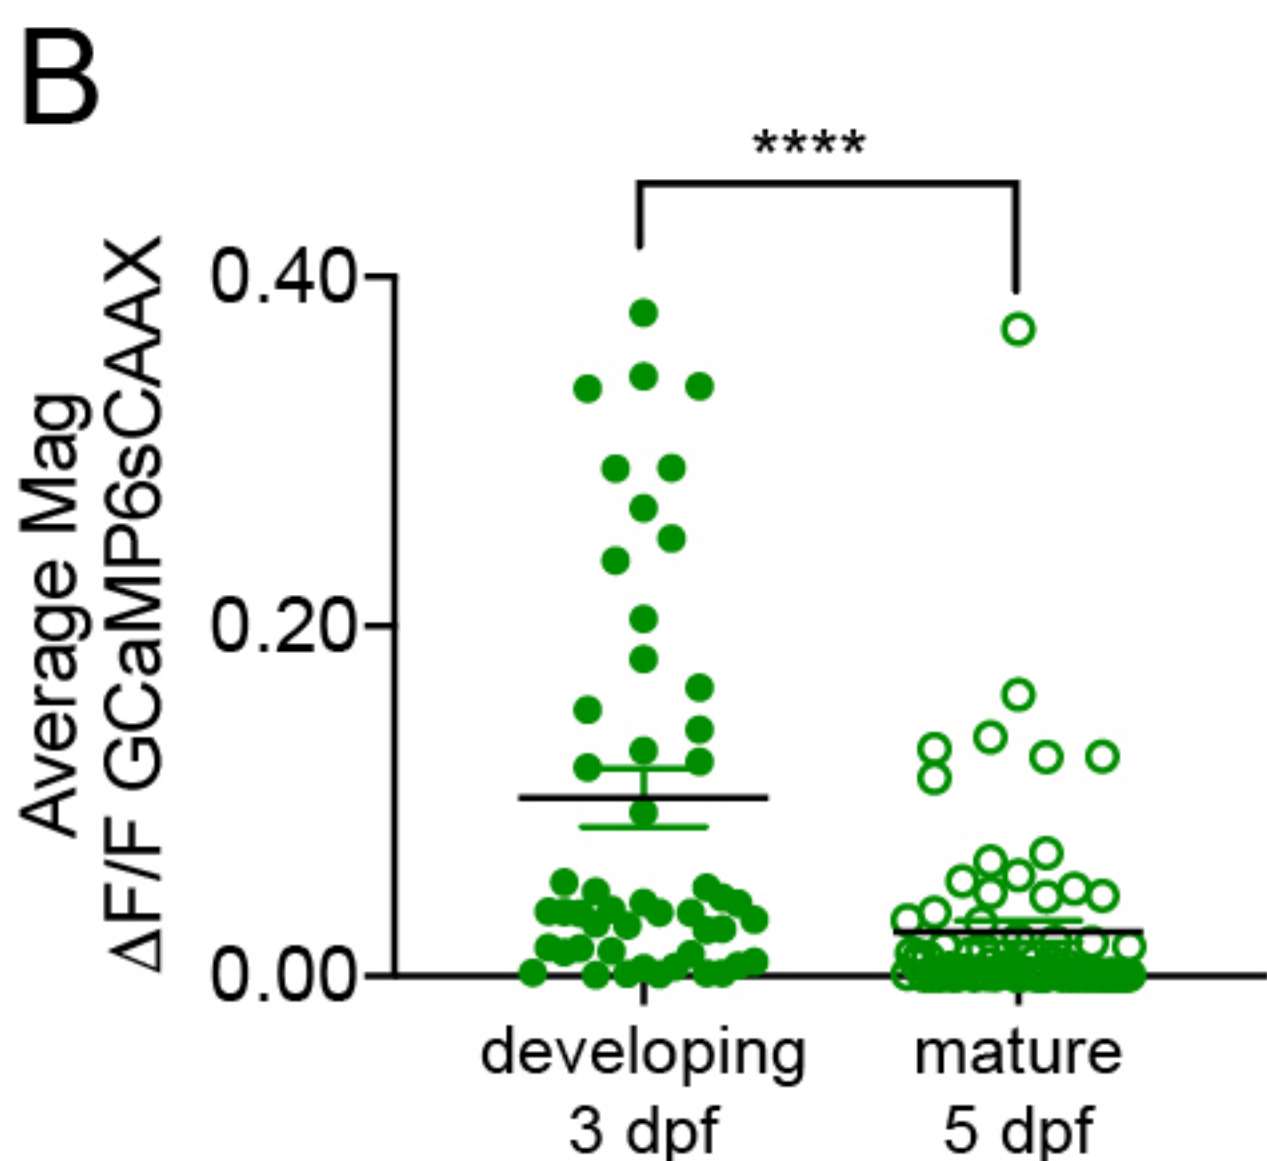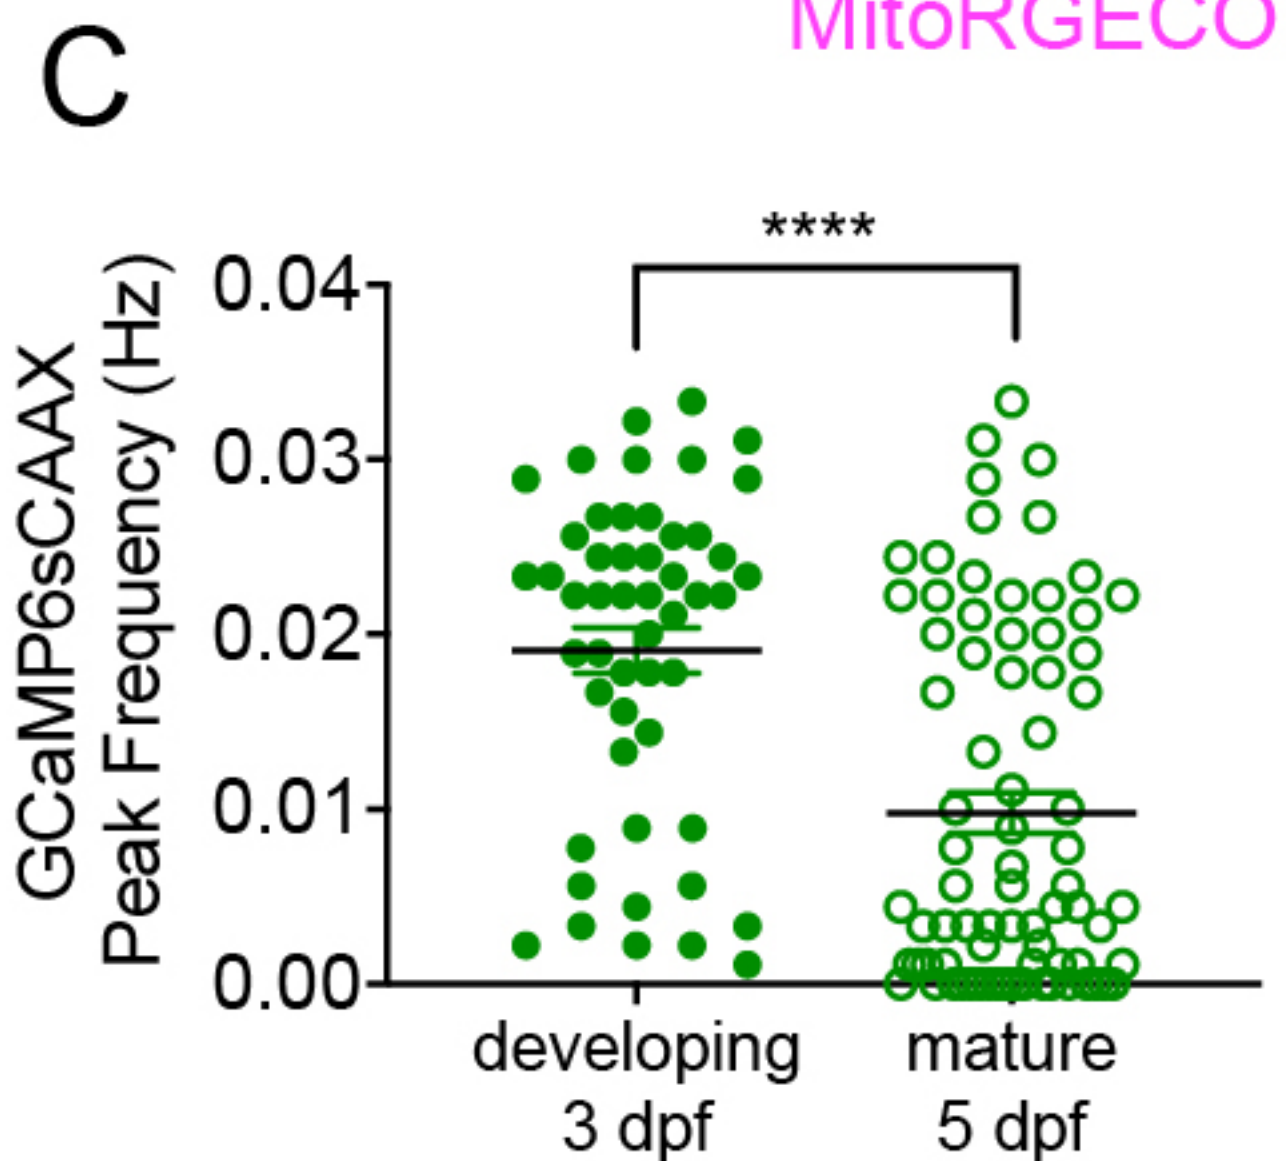

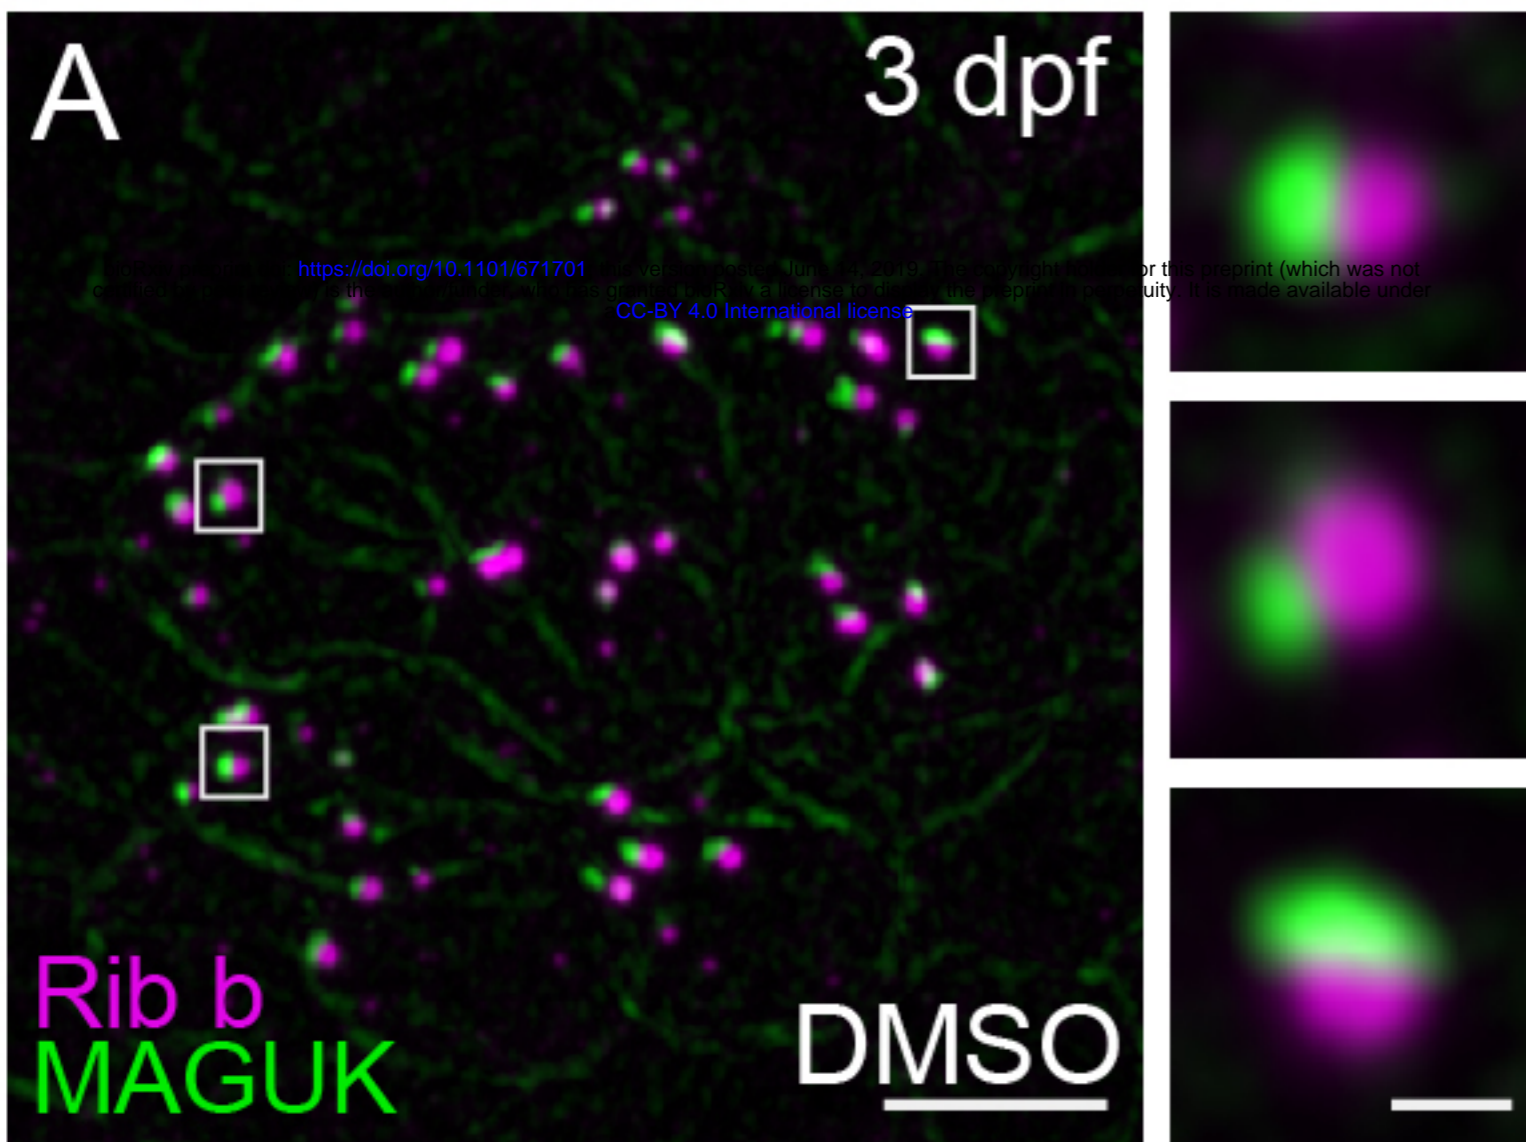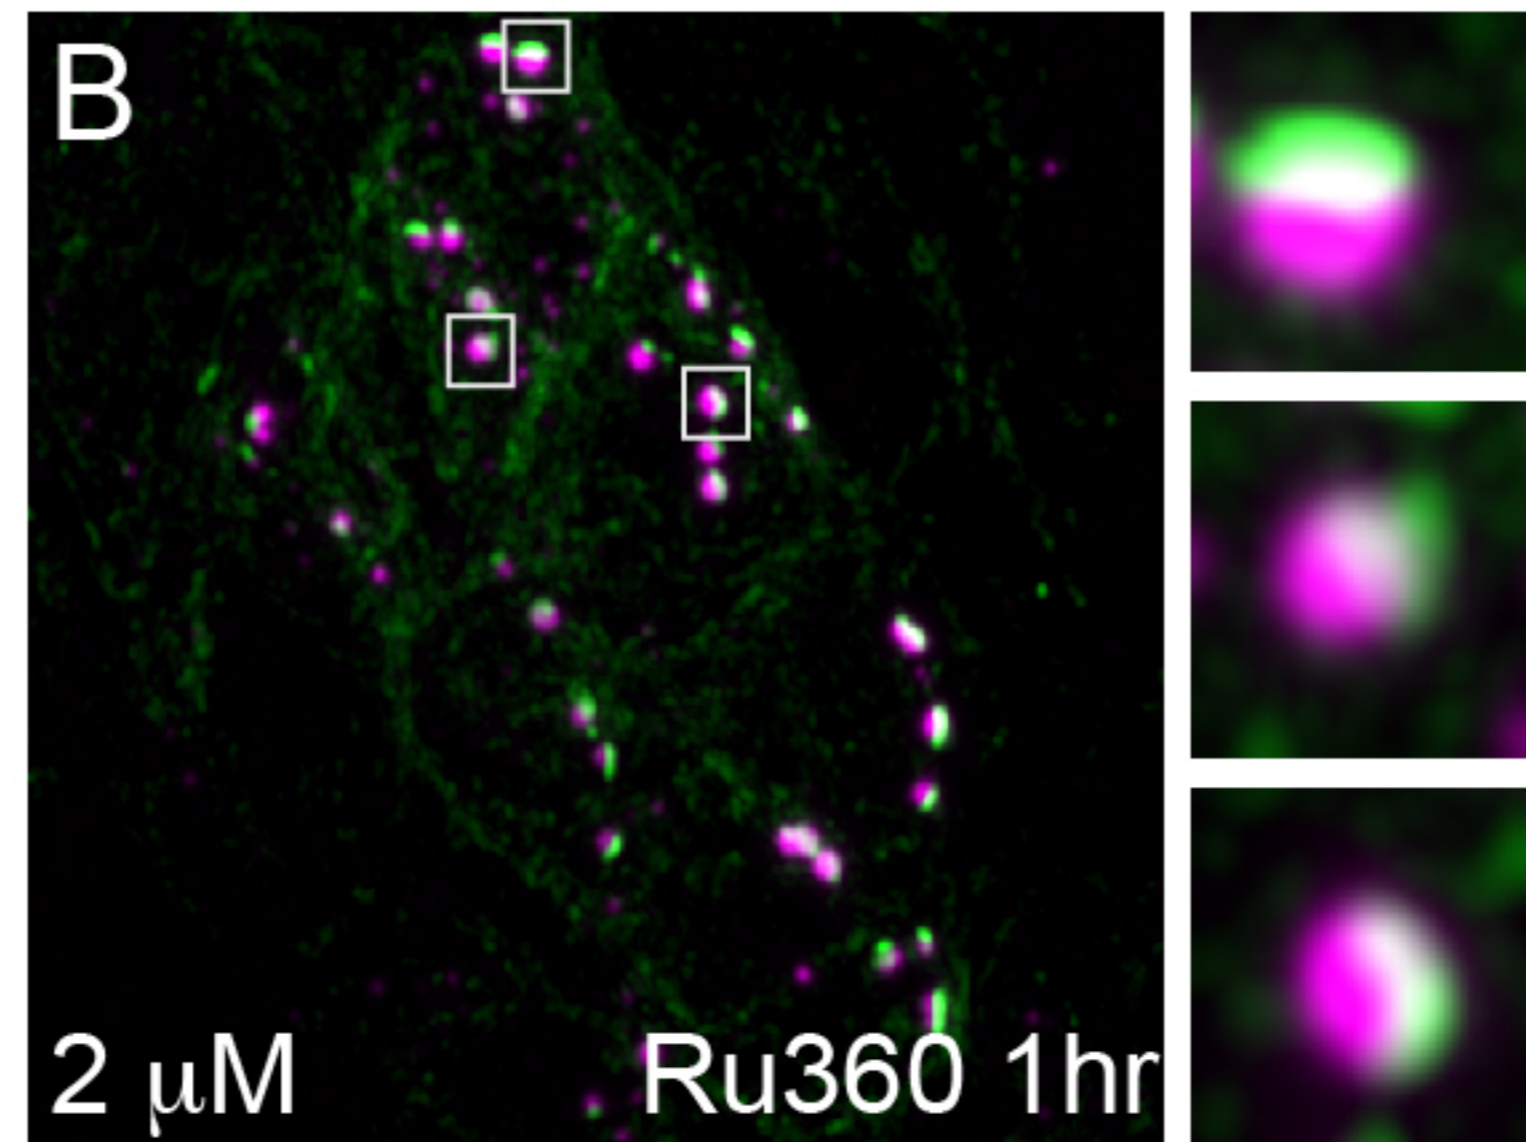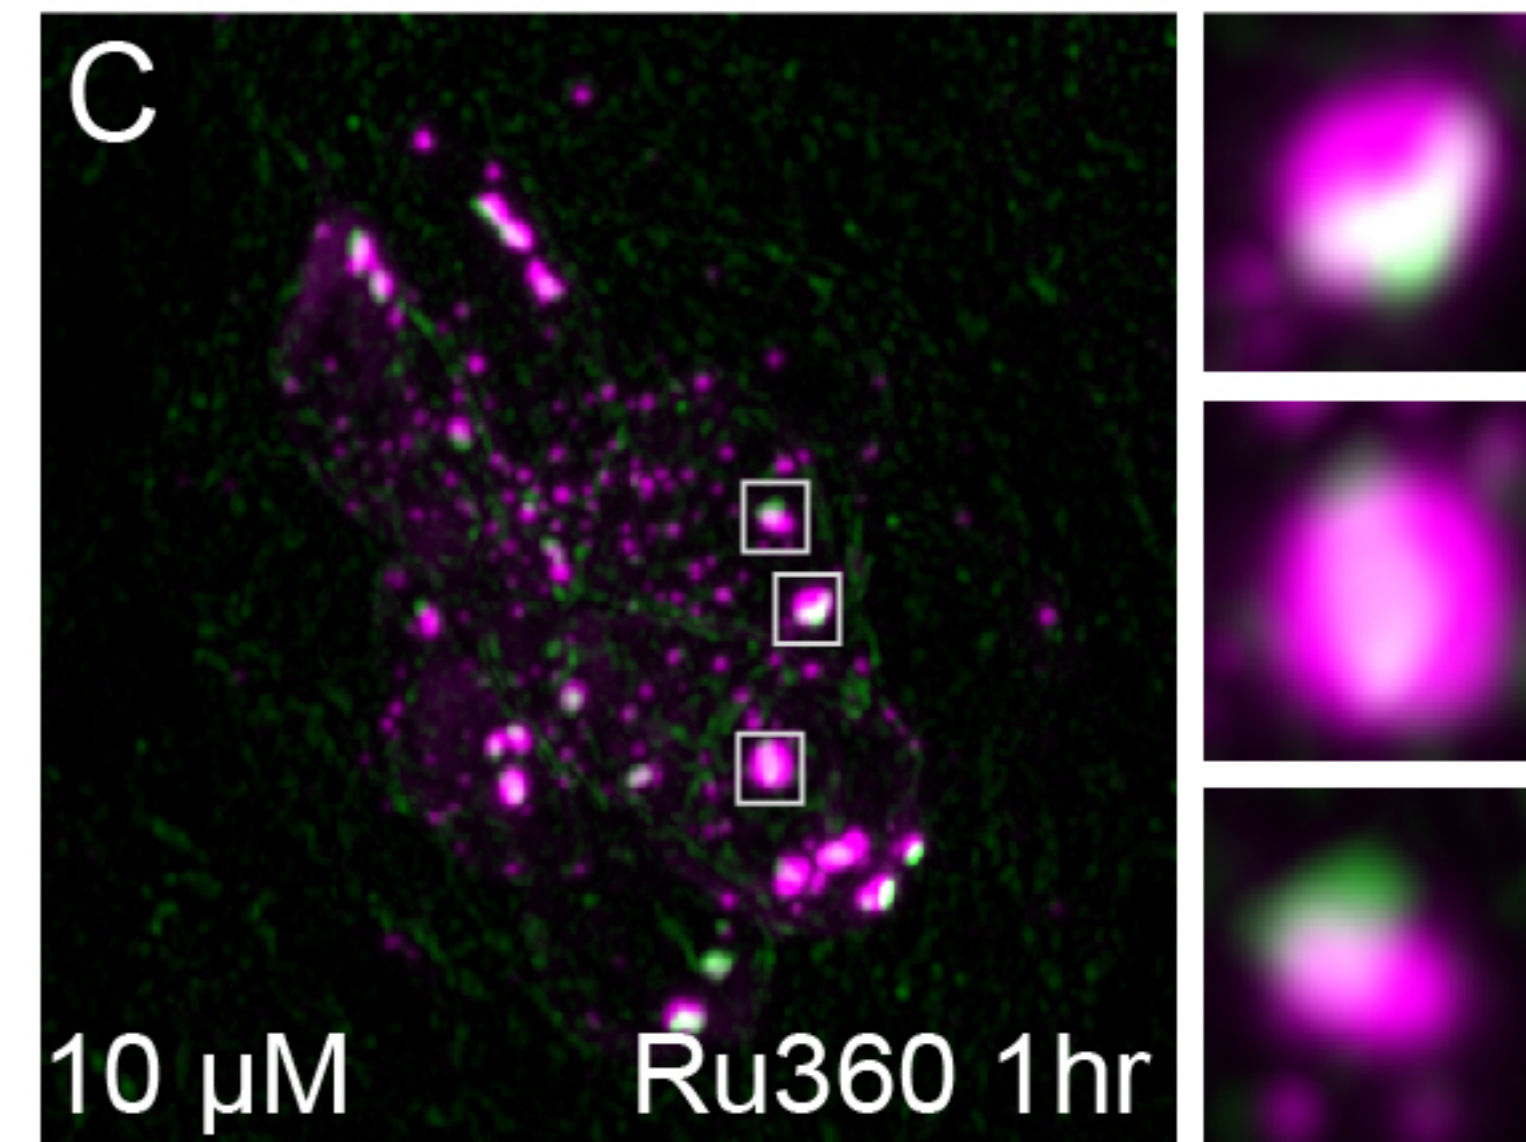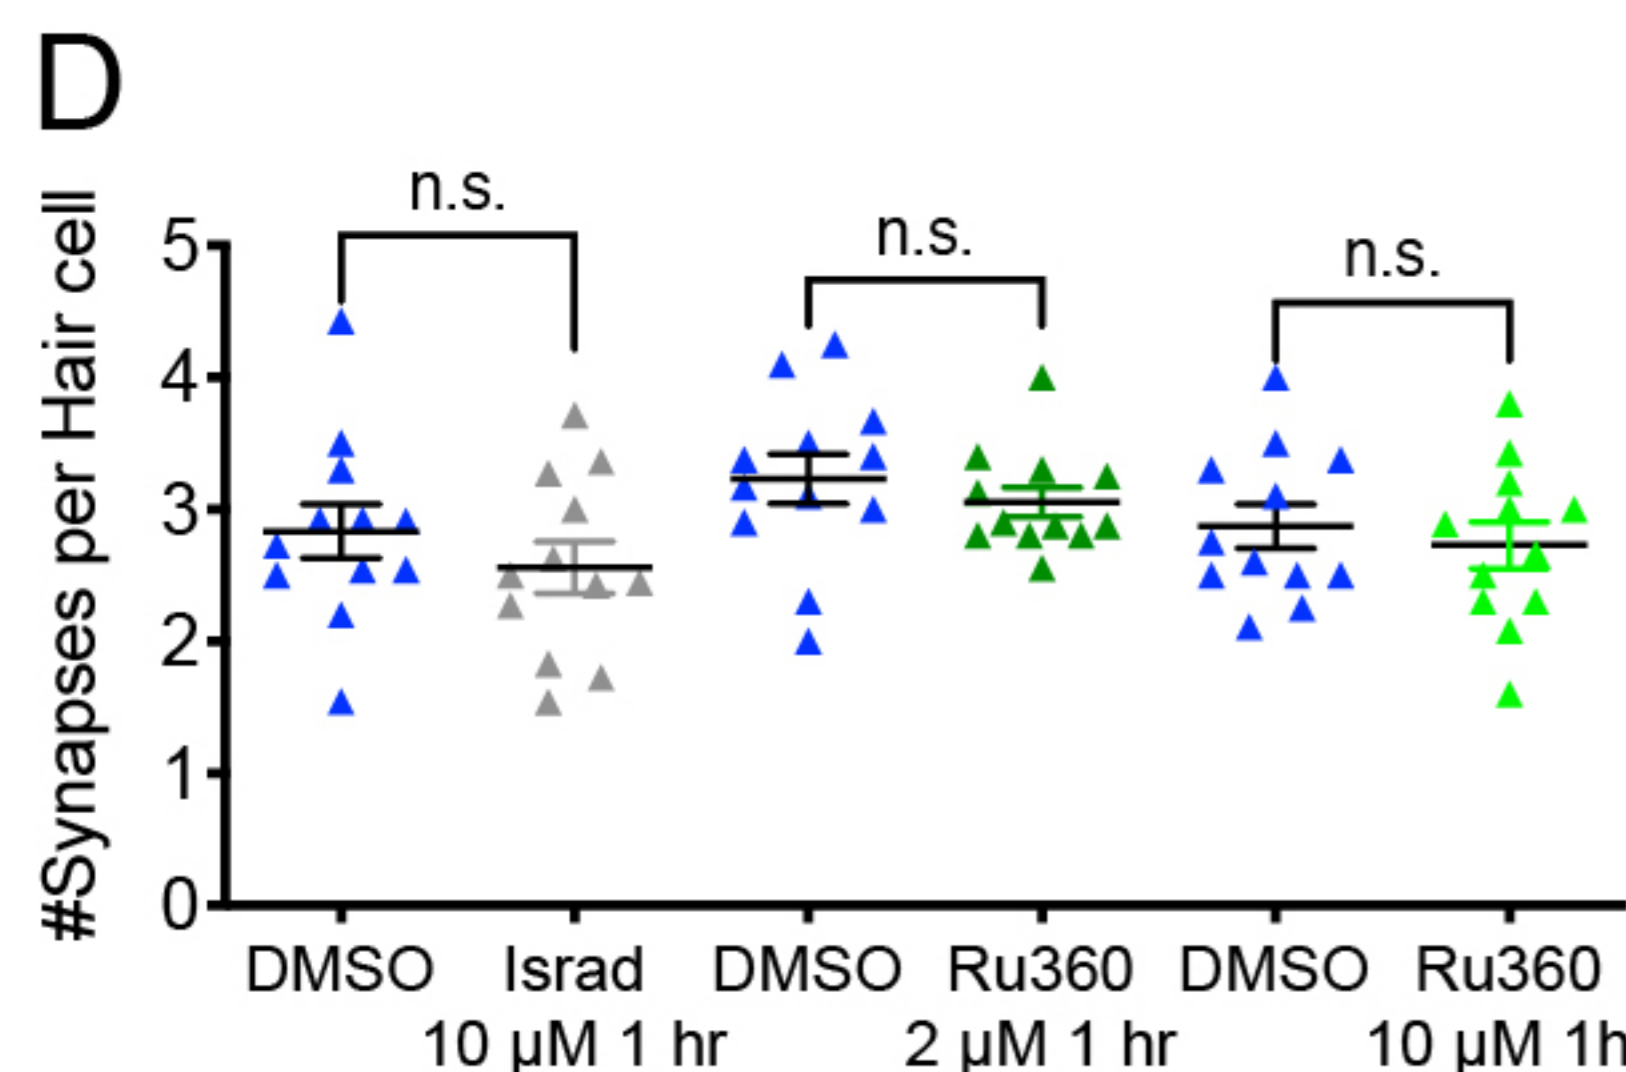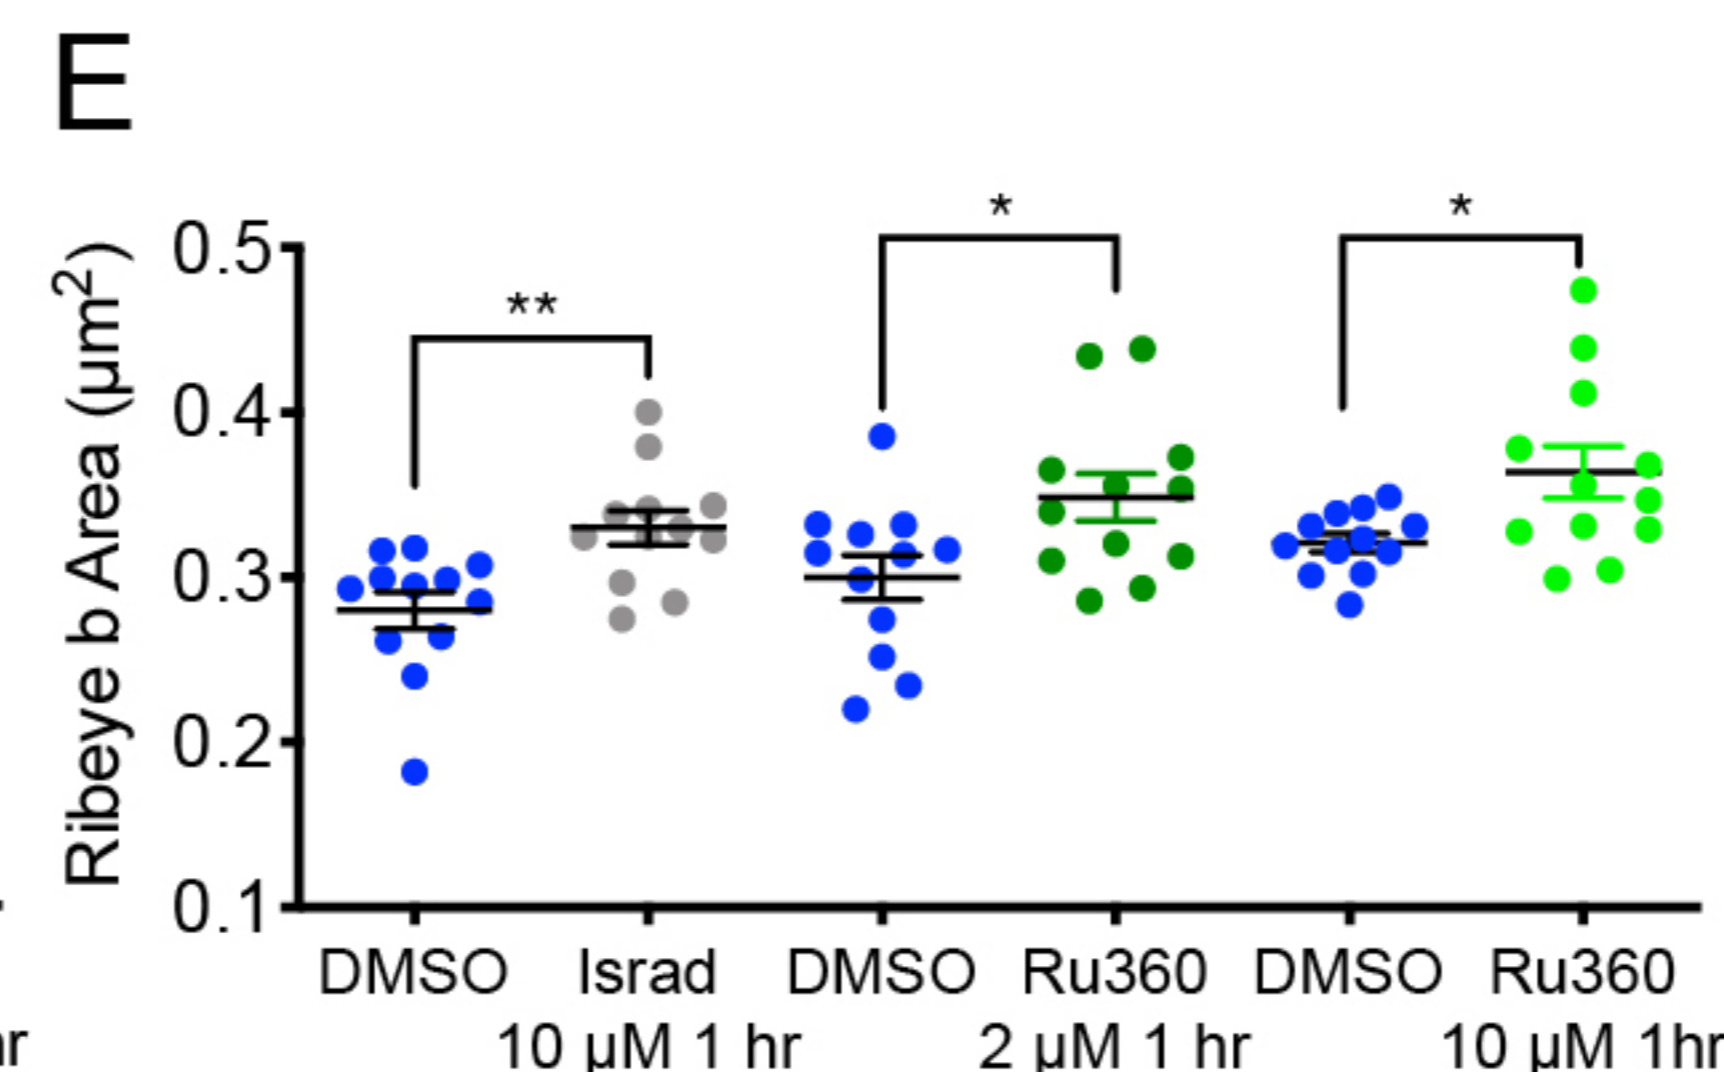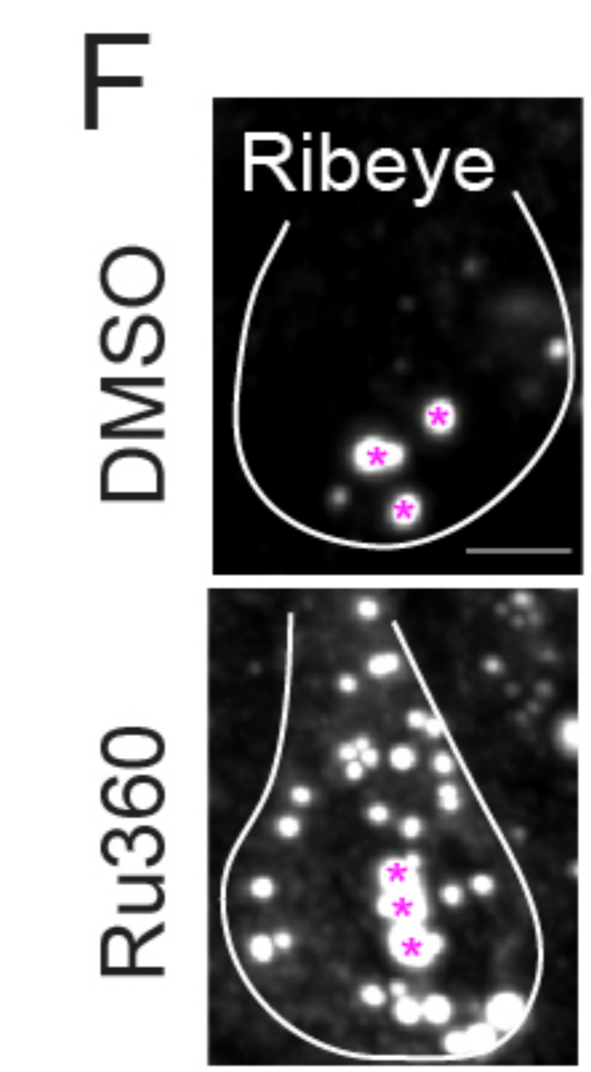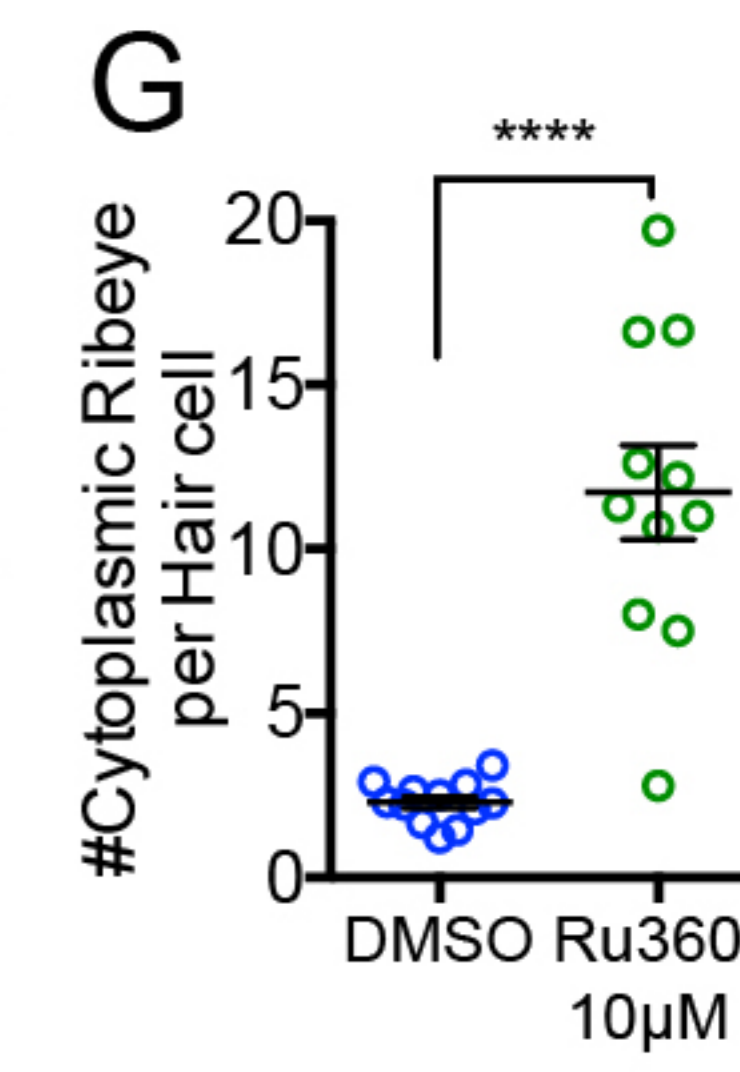

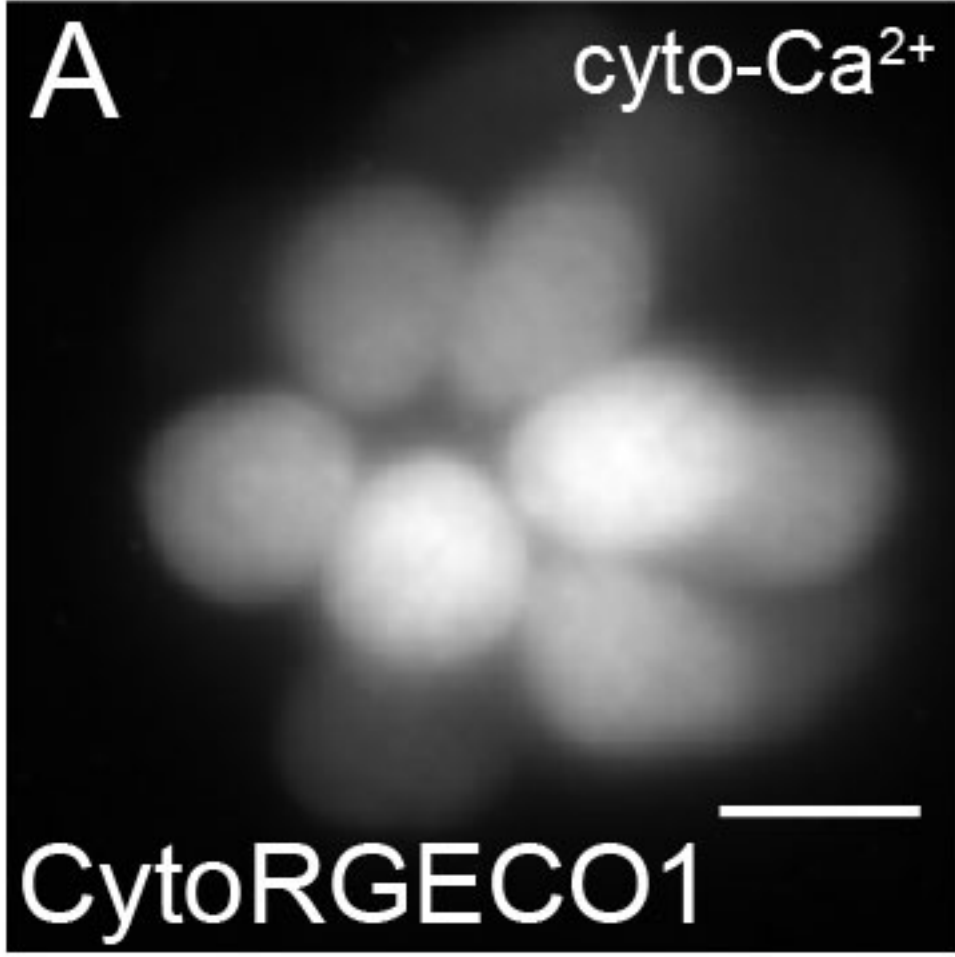

Immature 3 dpf

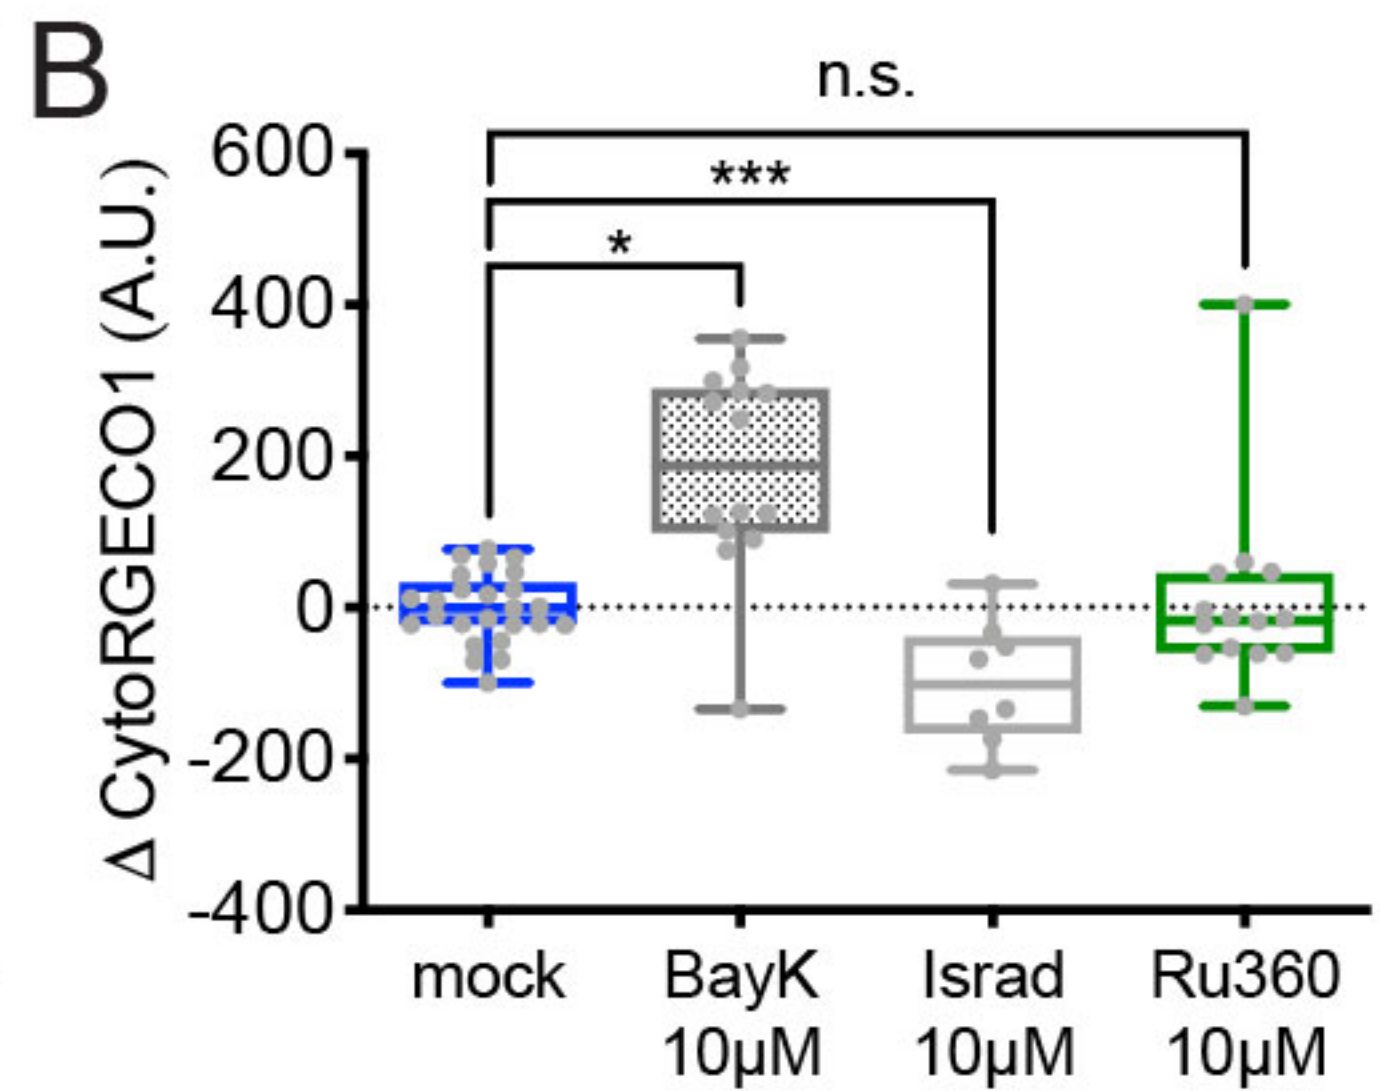

Mature 5 dpf

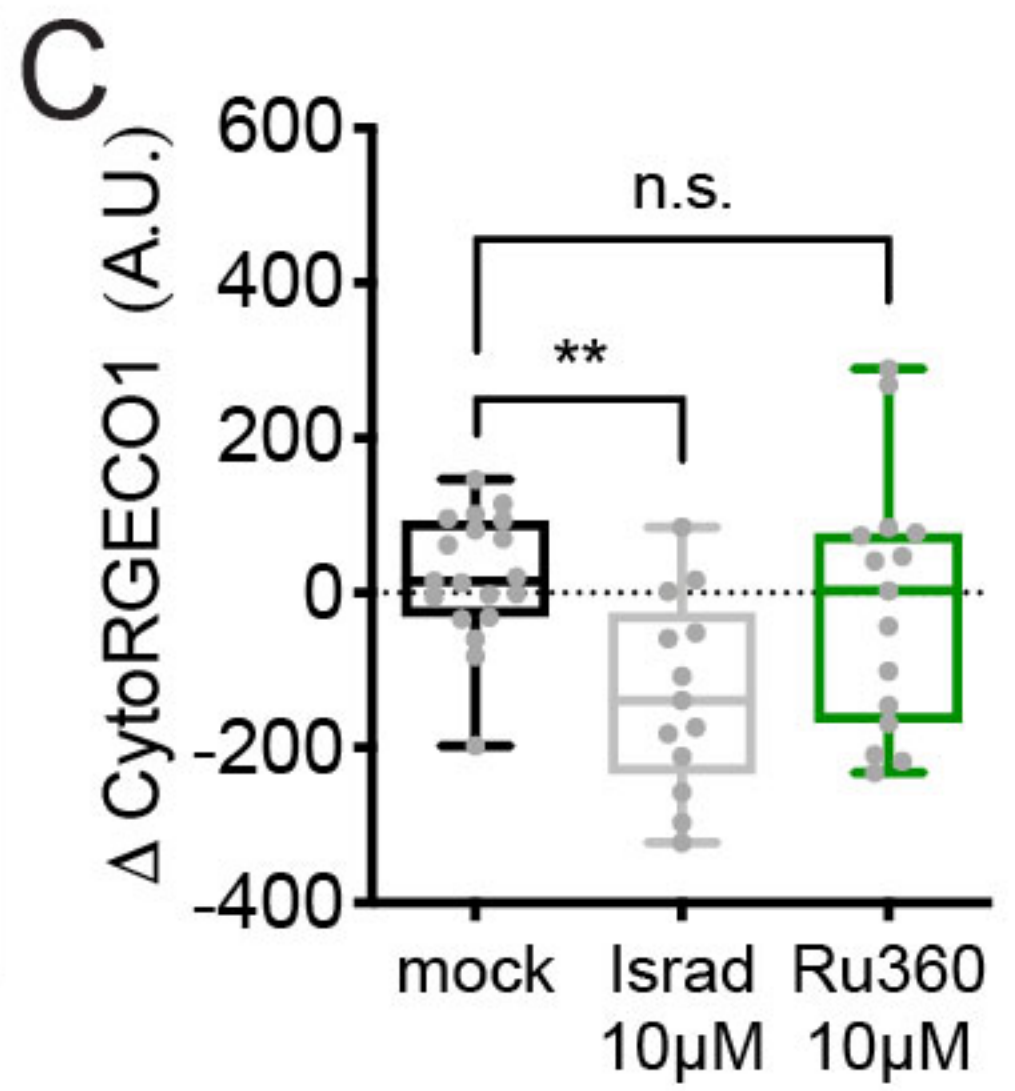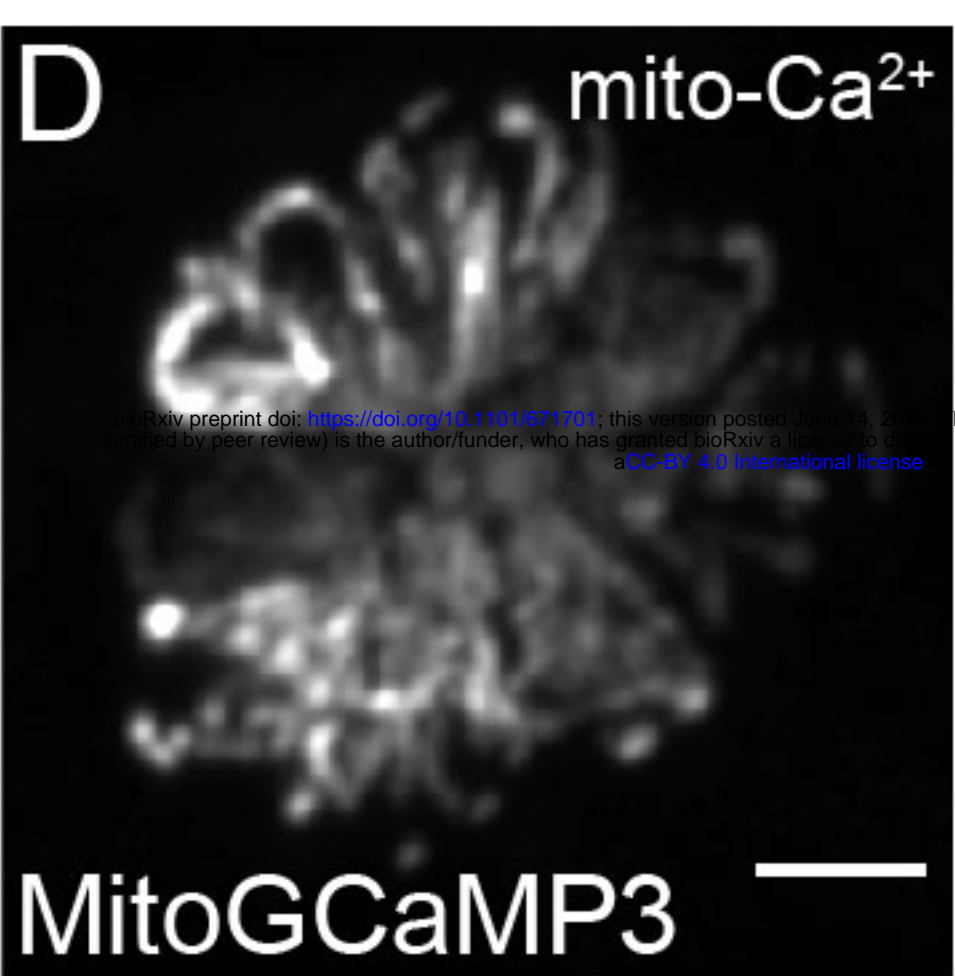

Immature 3 dpf

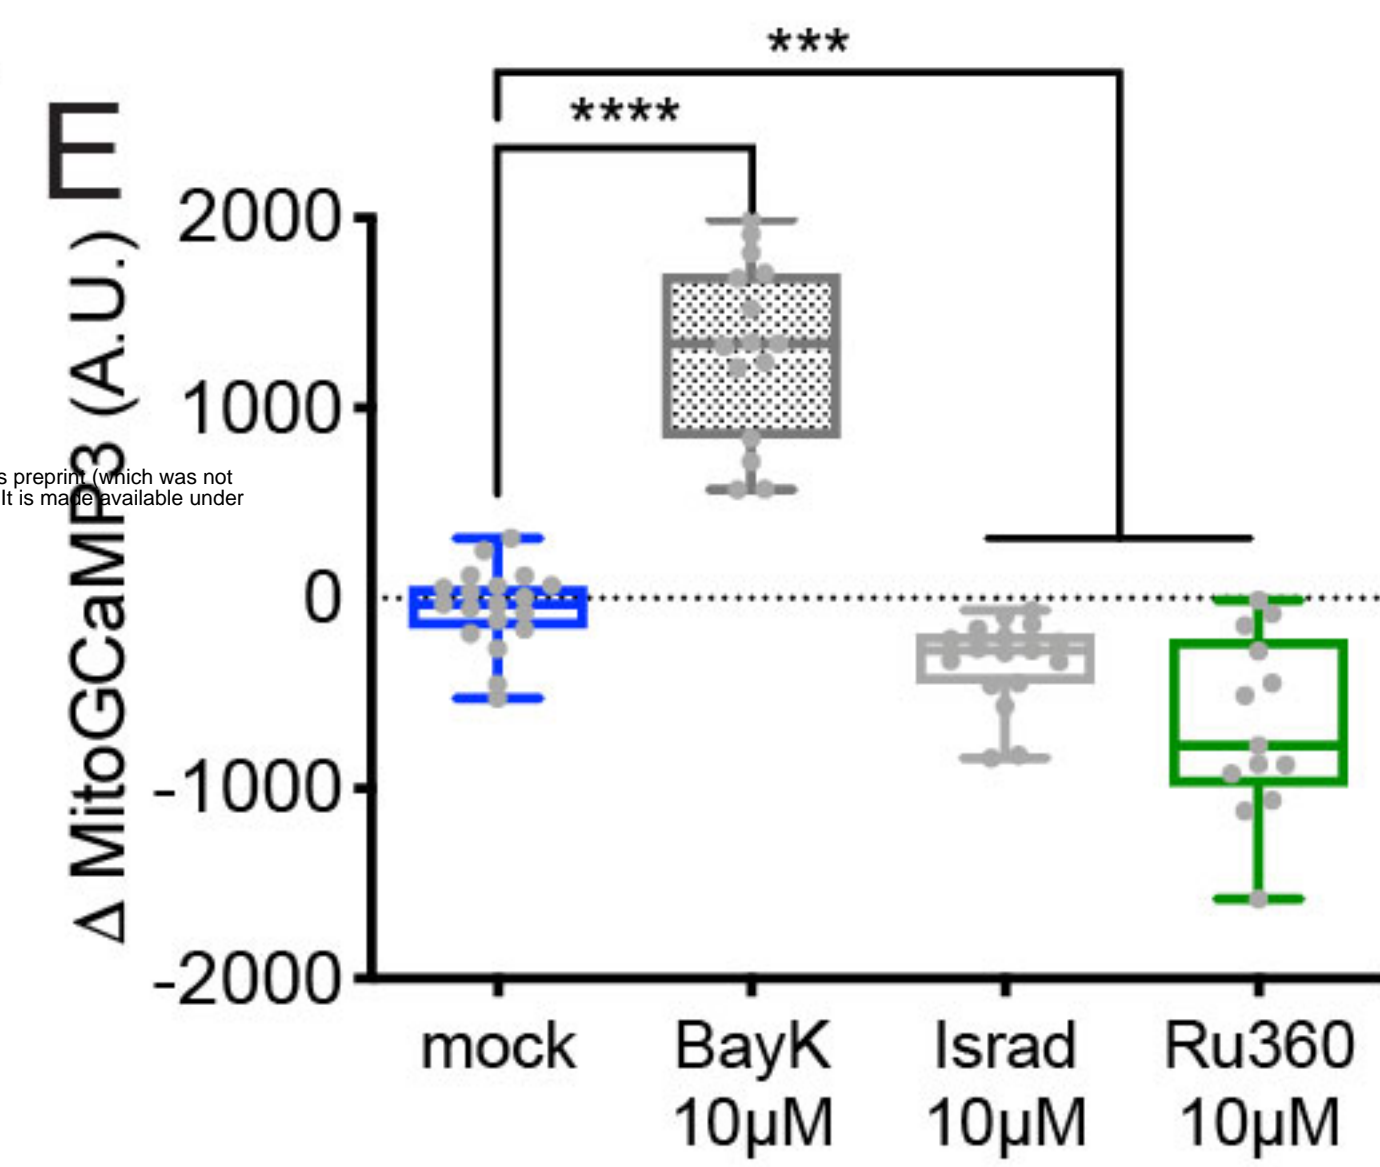

Mature 5 dpf

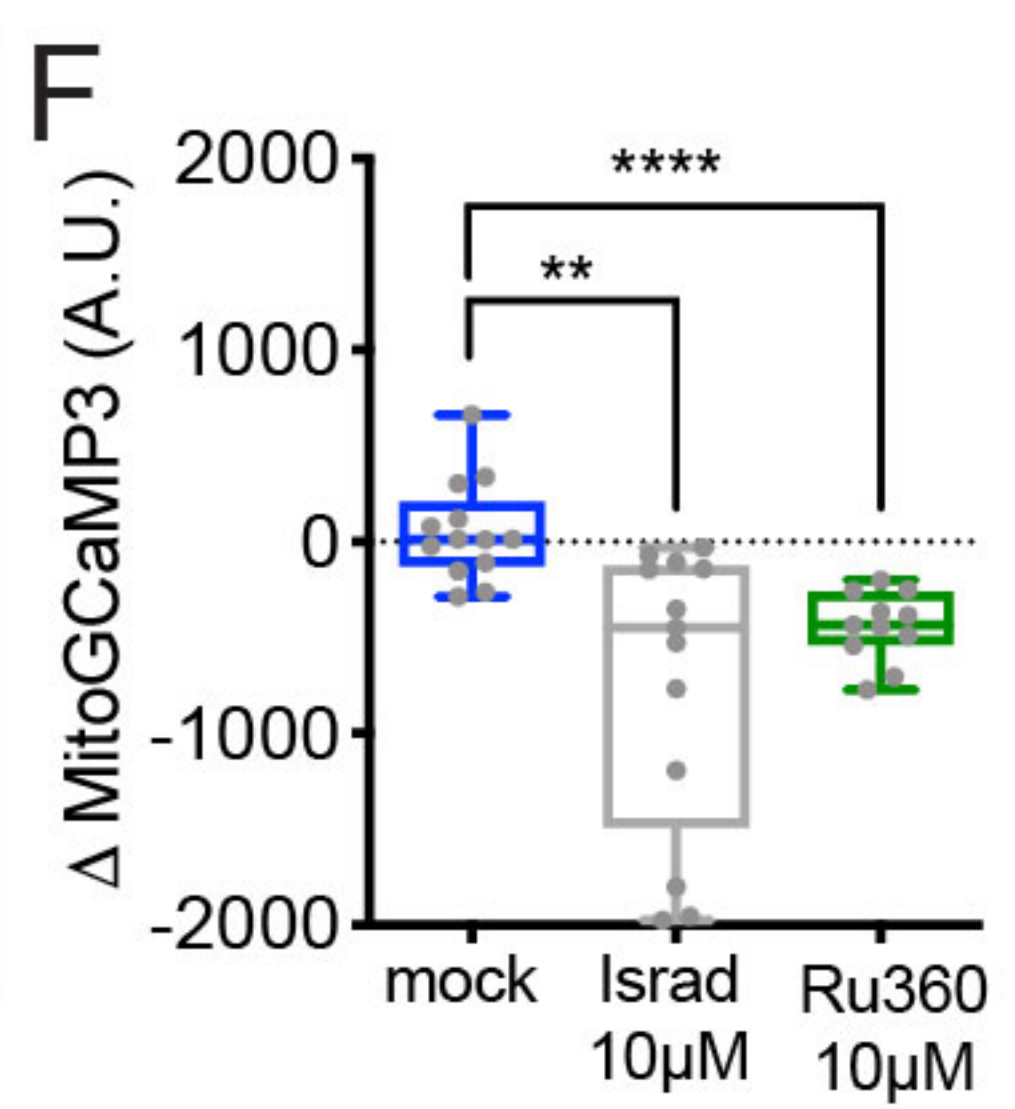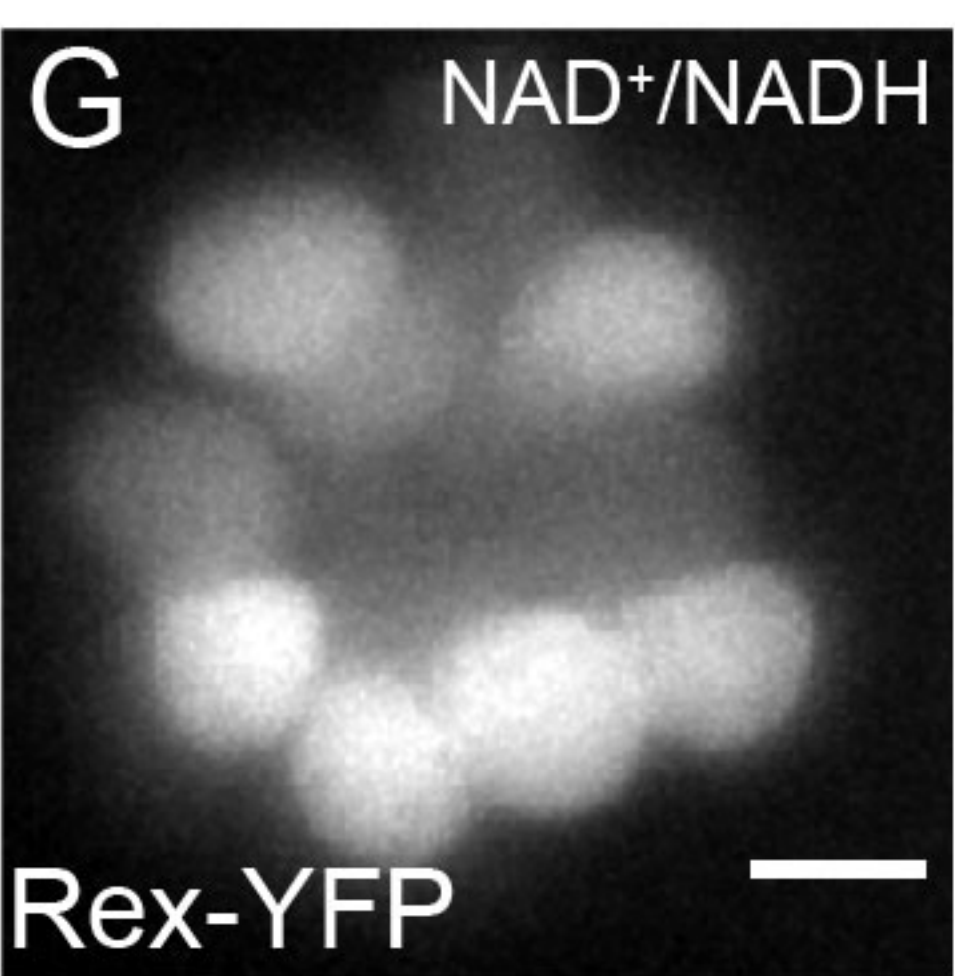

Immature 3 dpf

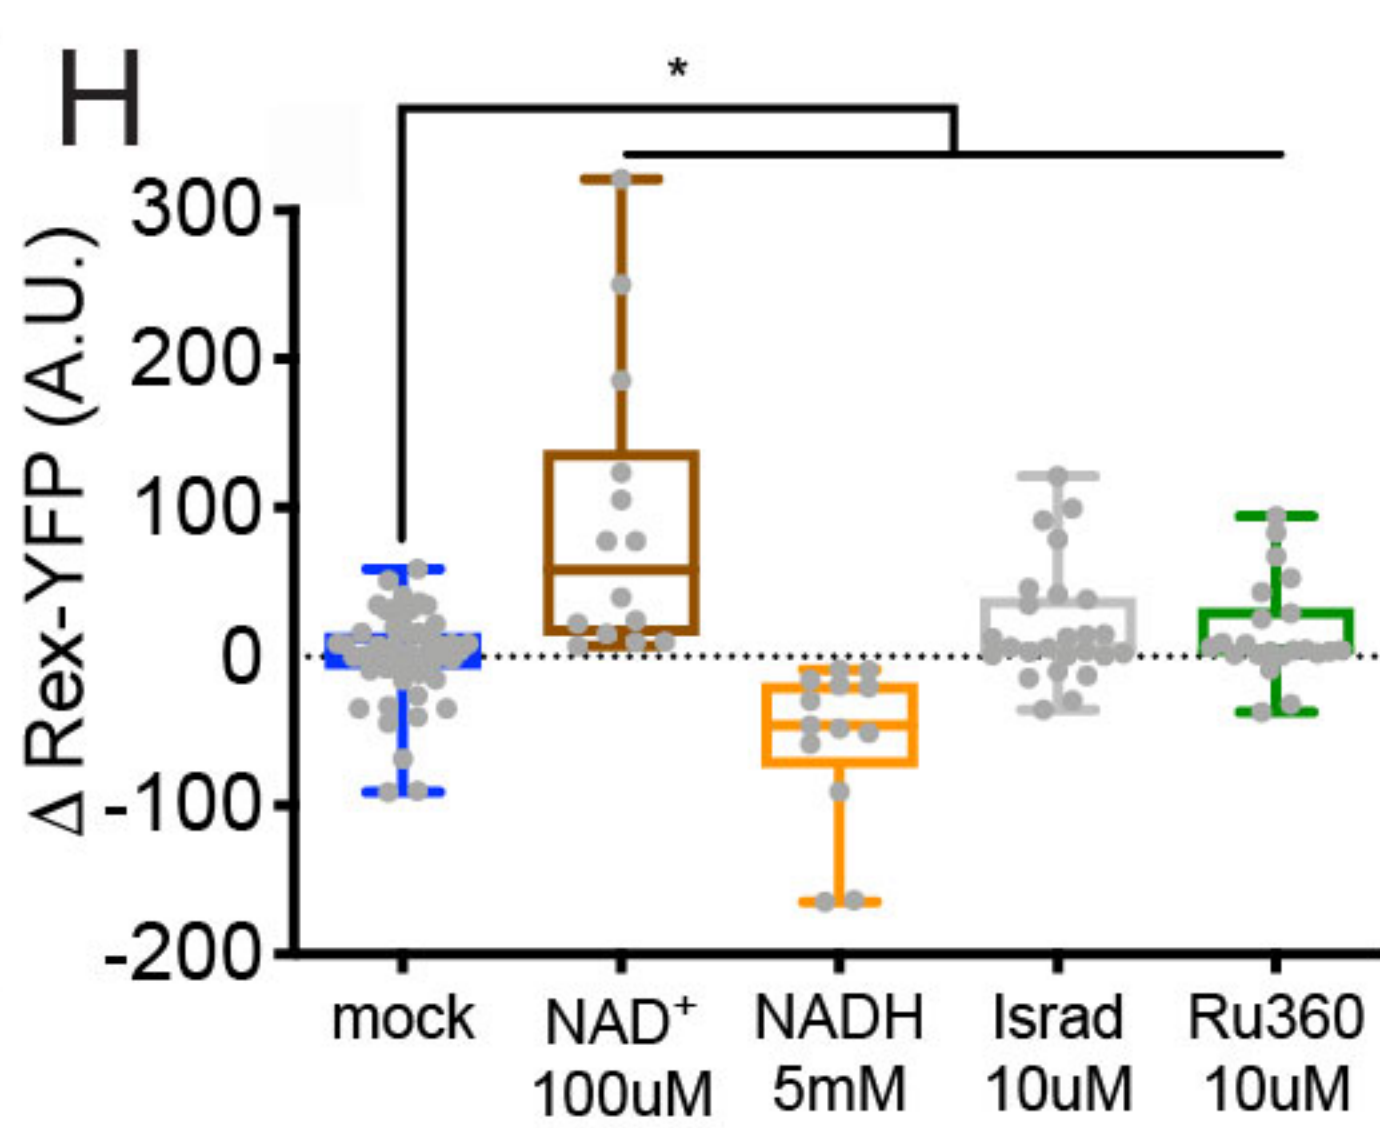

Mature 5 dpf

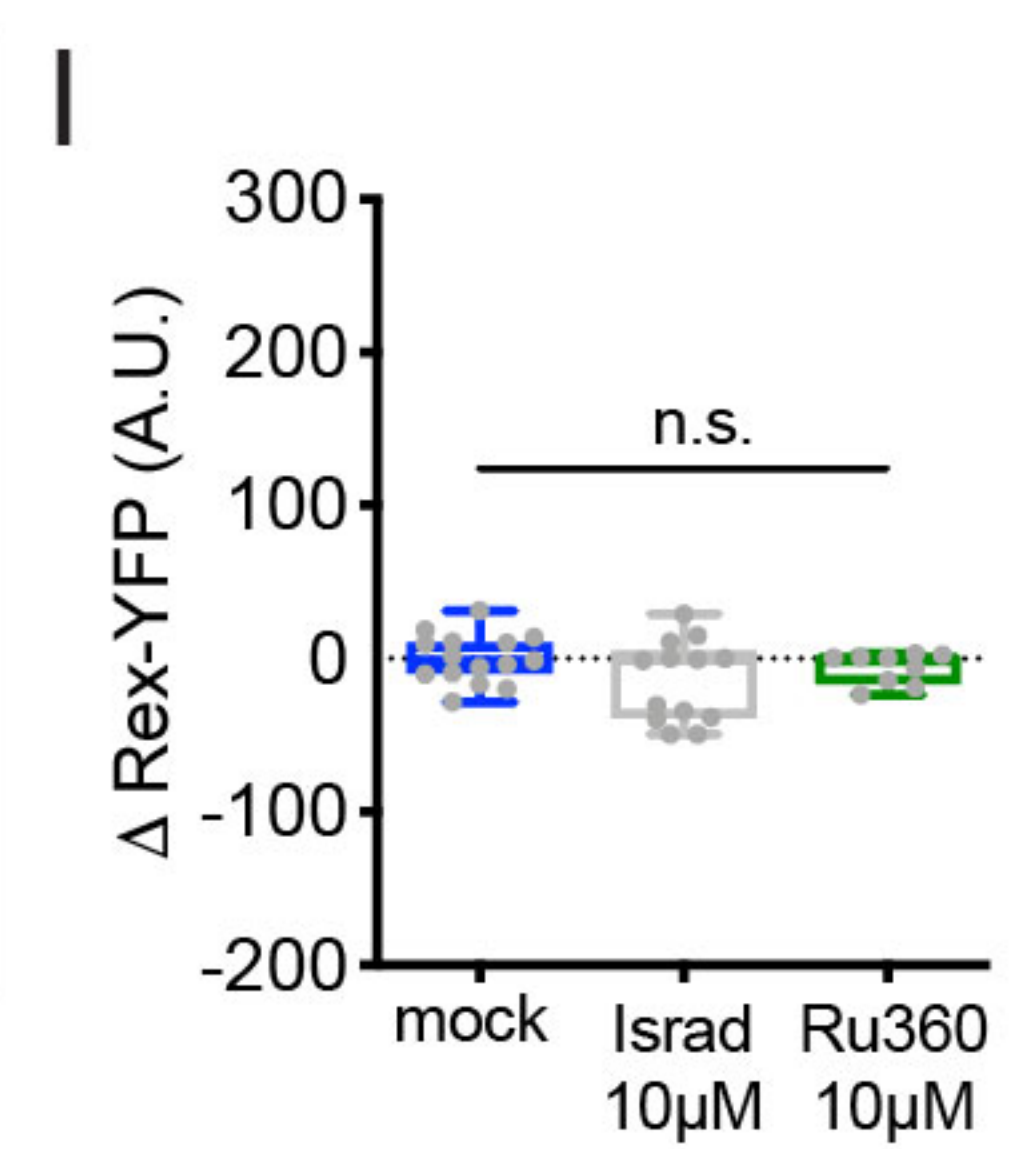

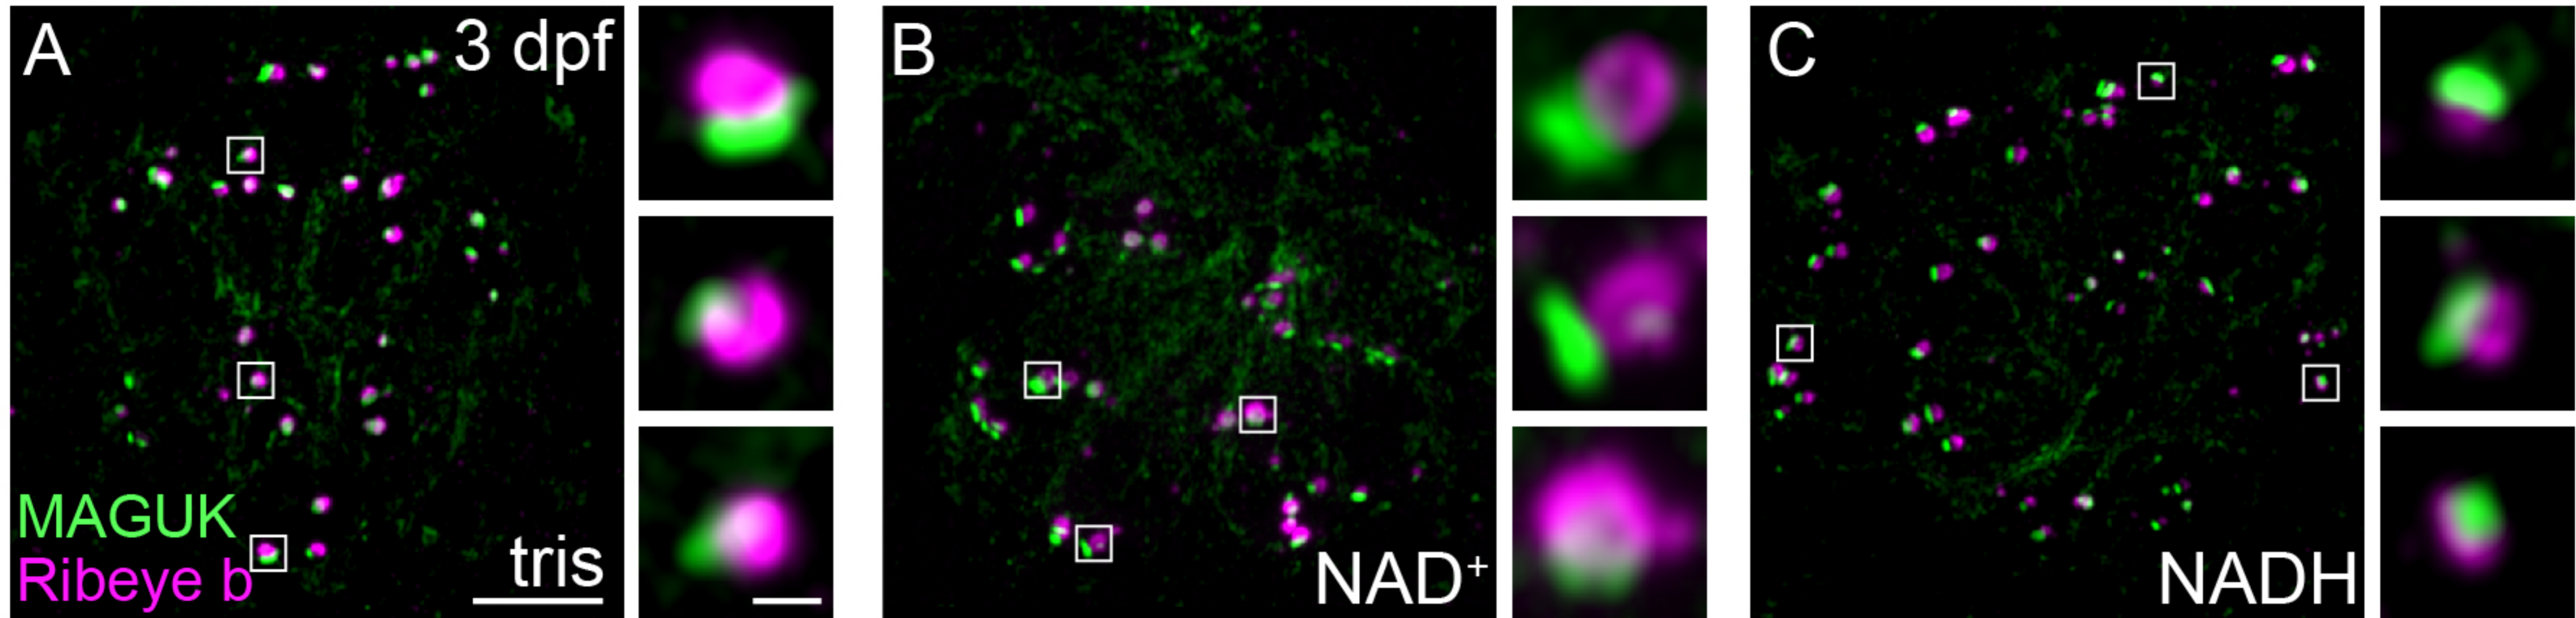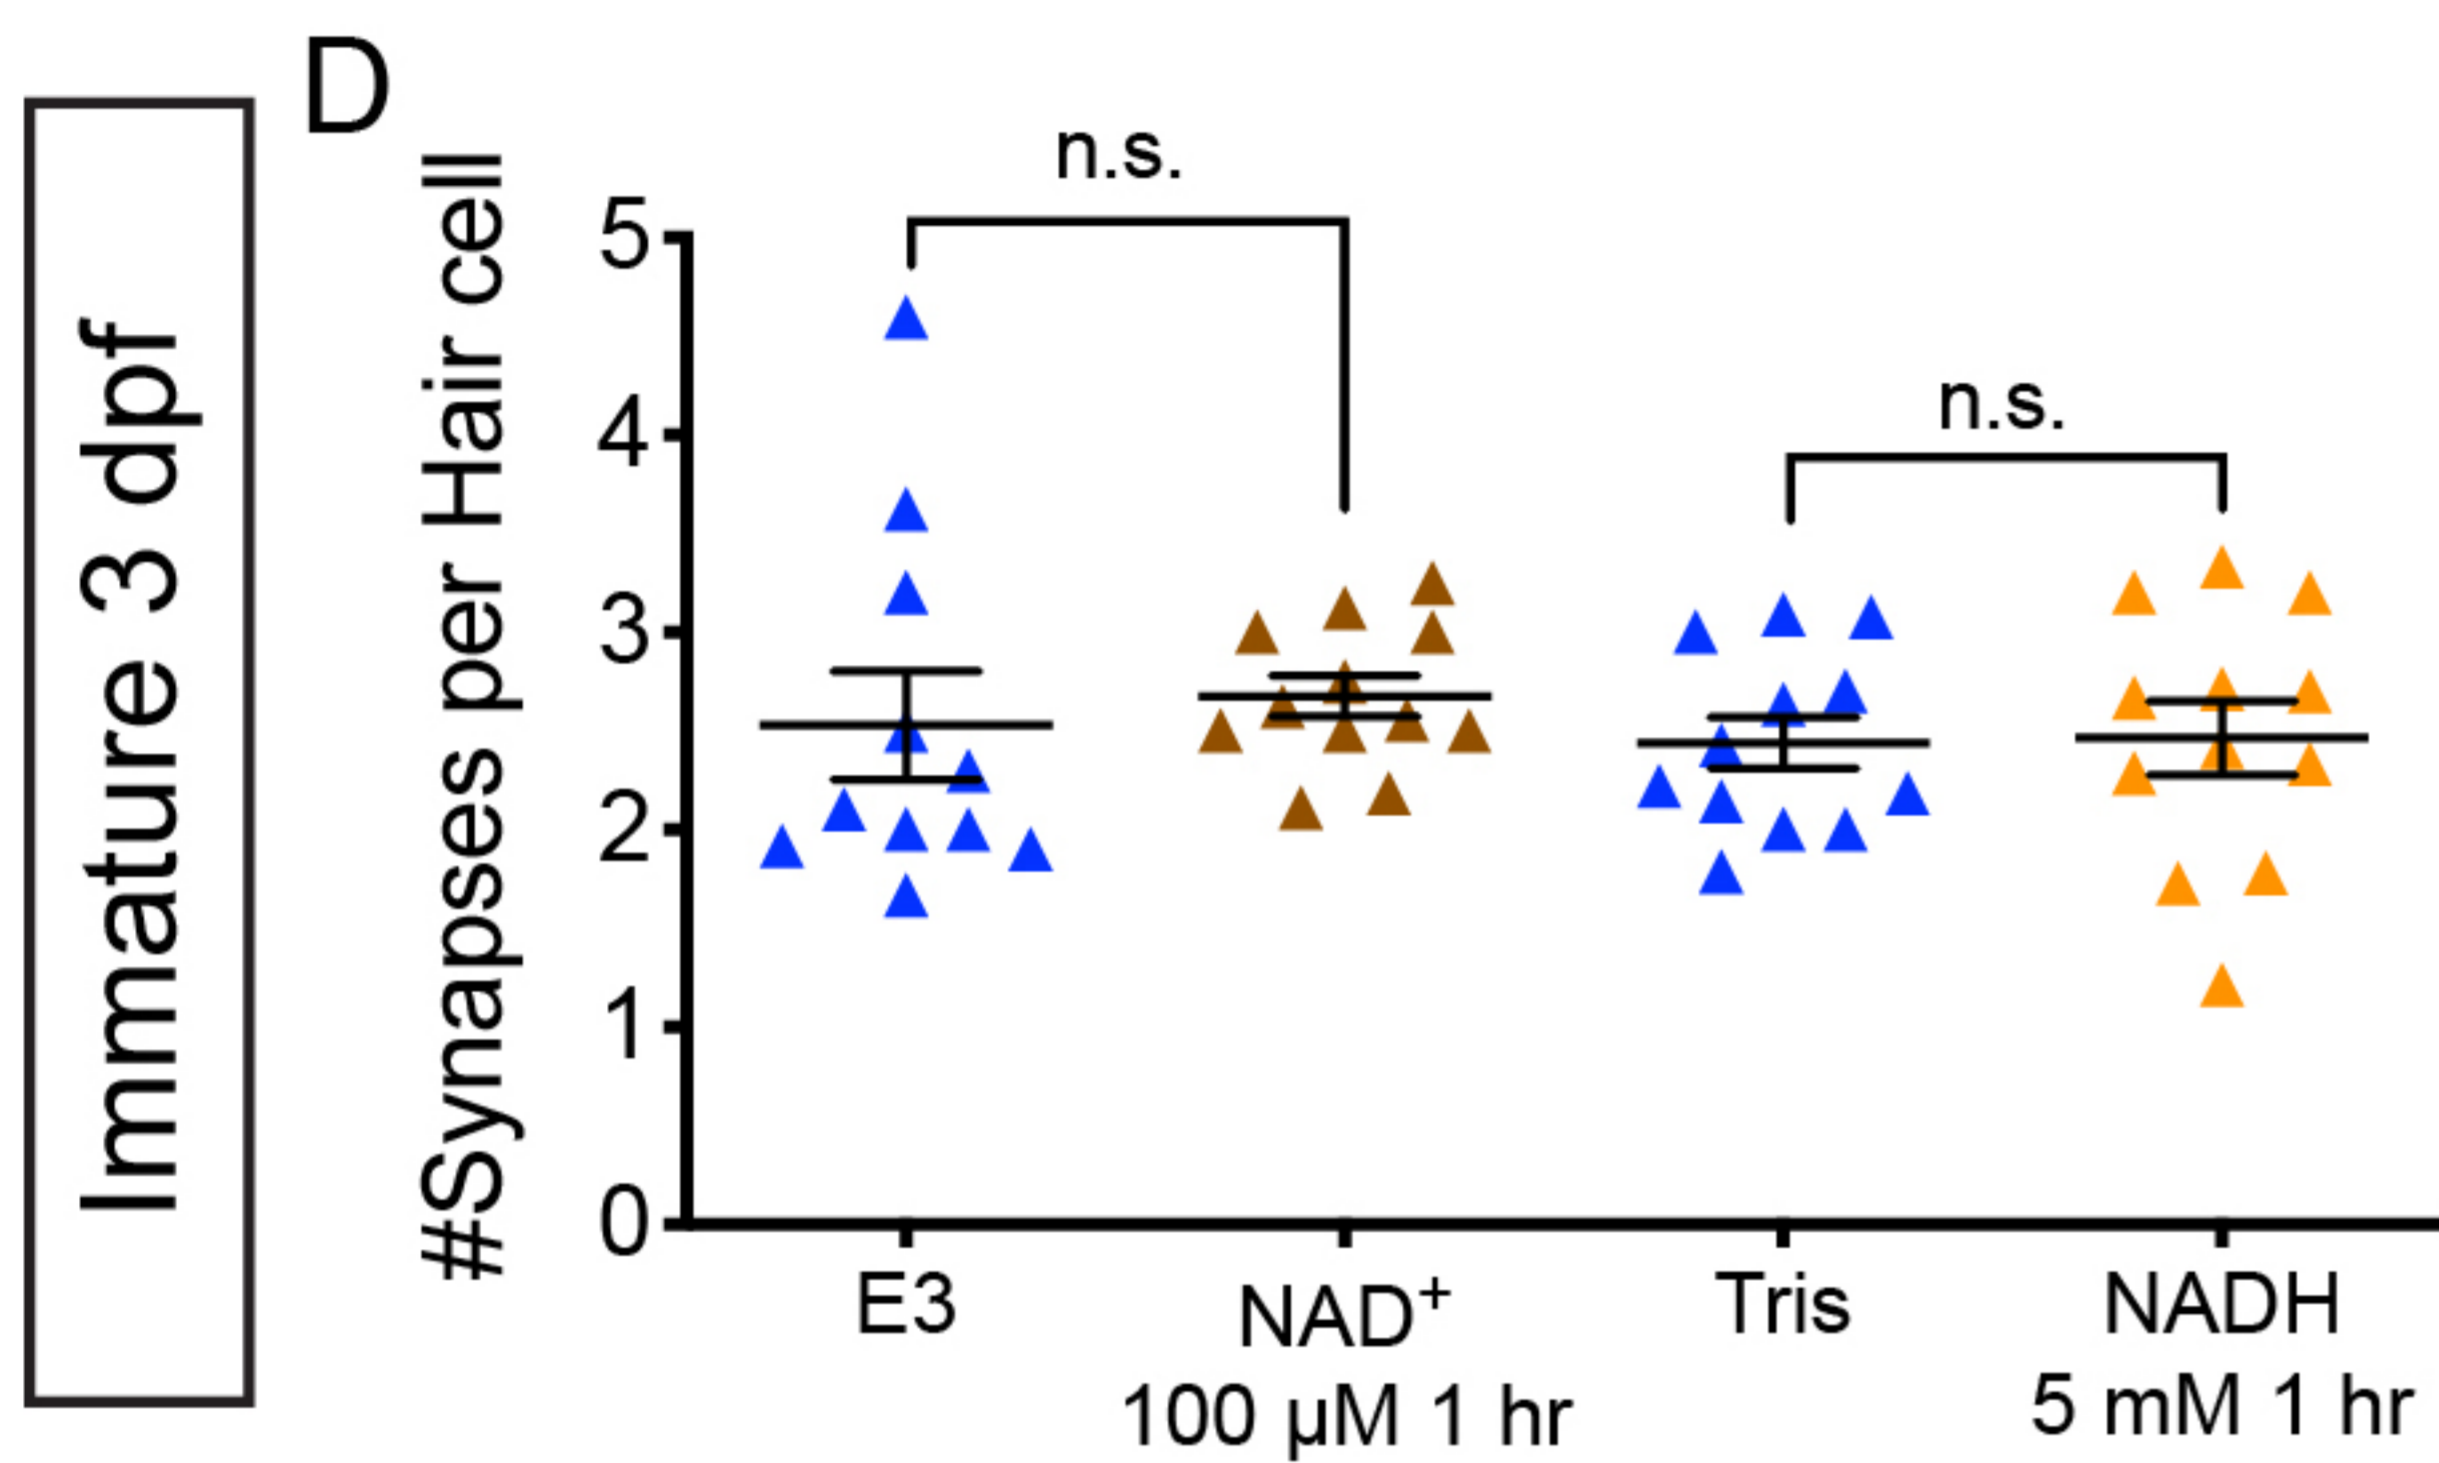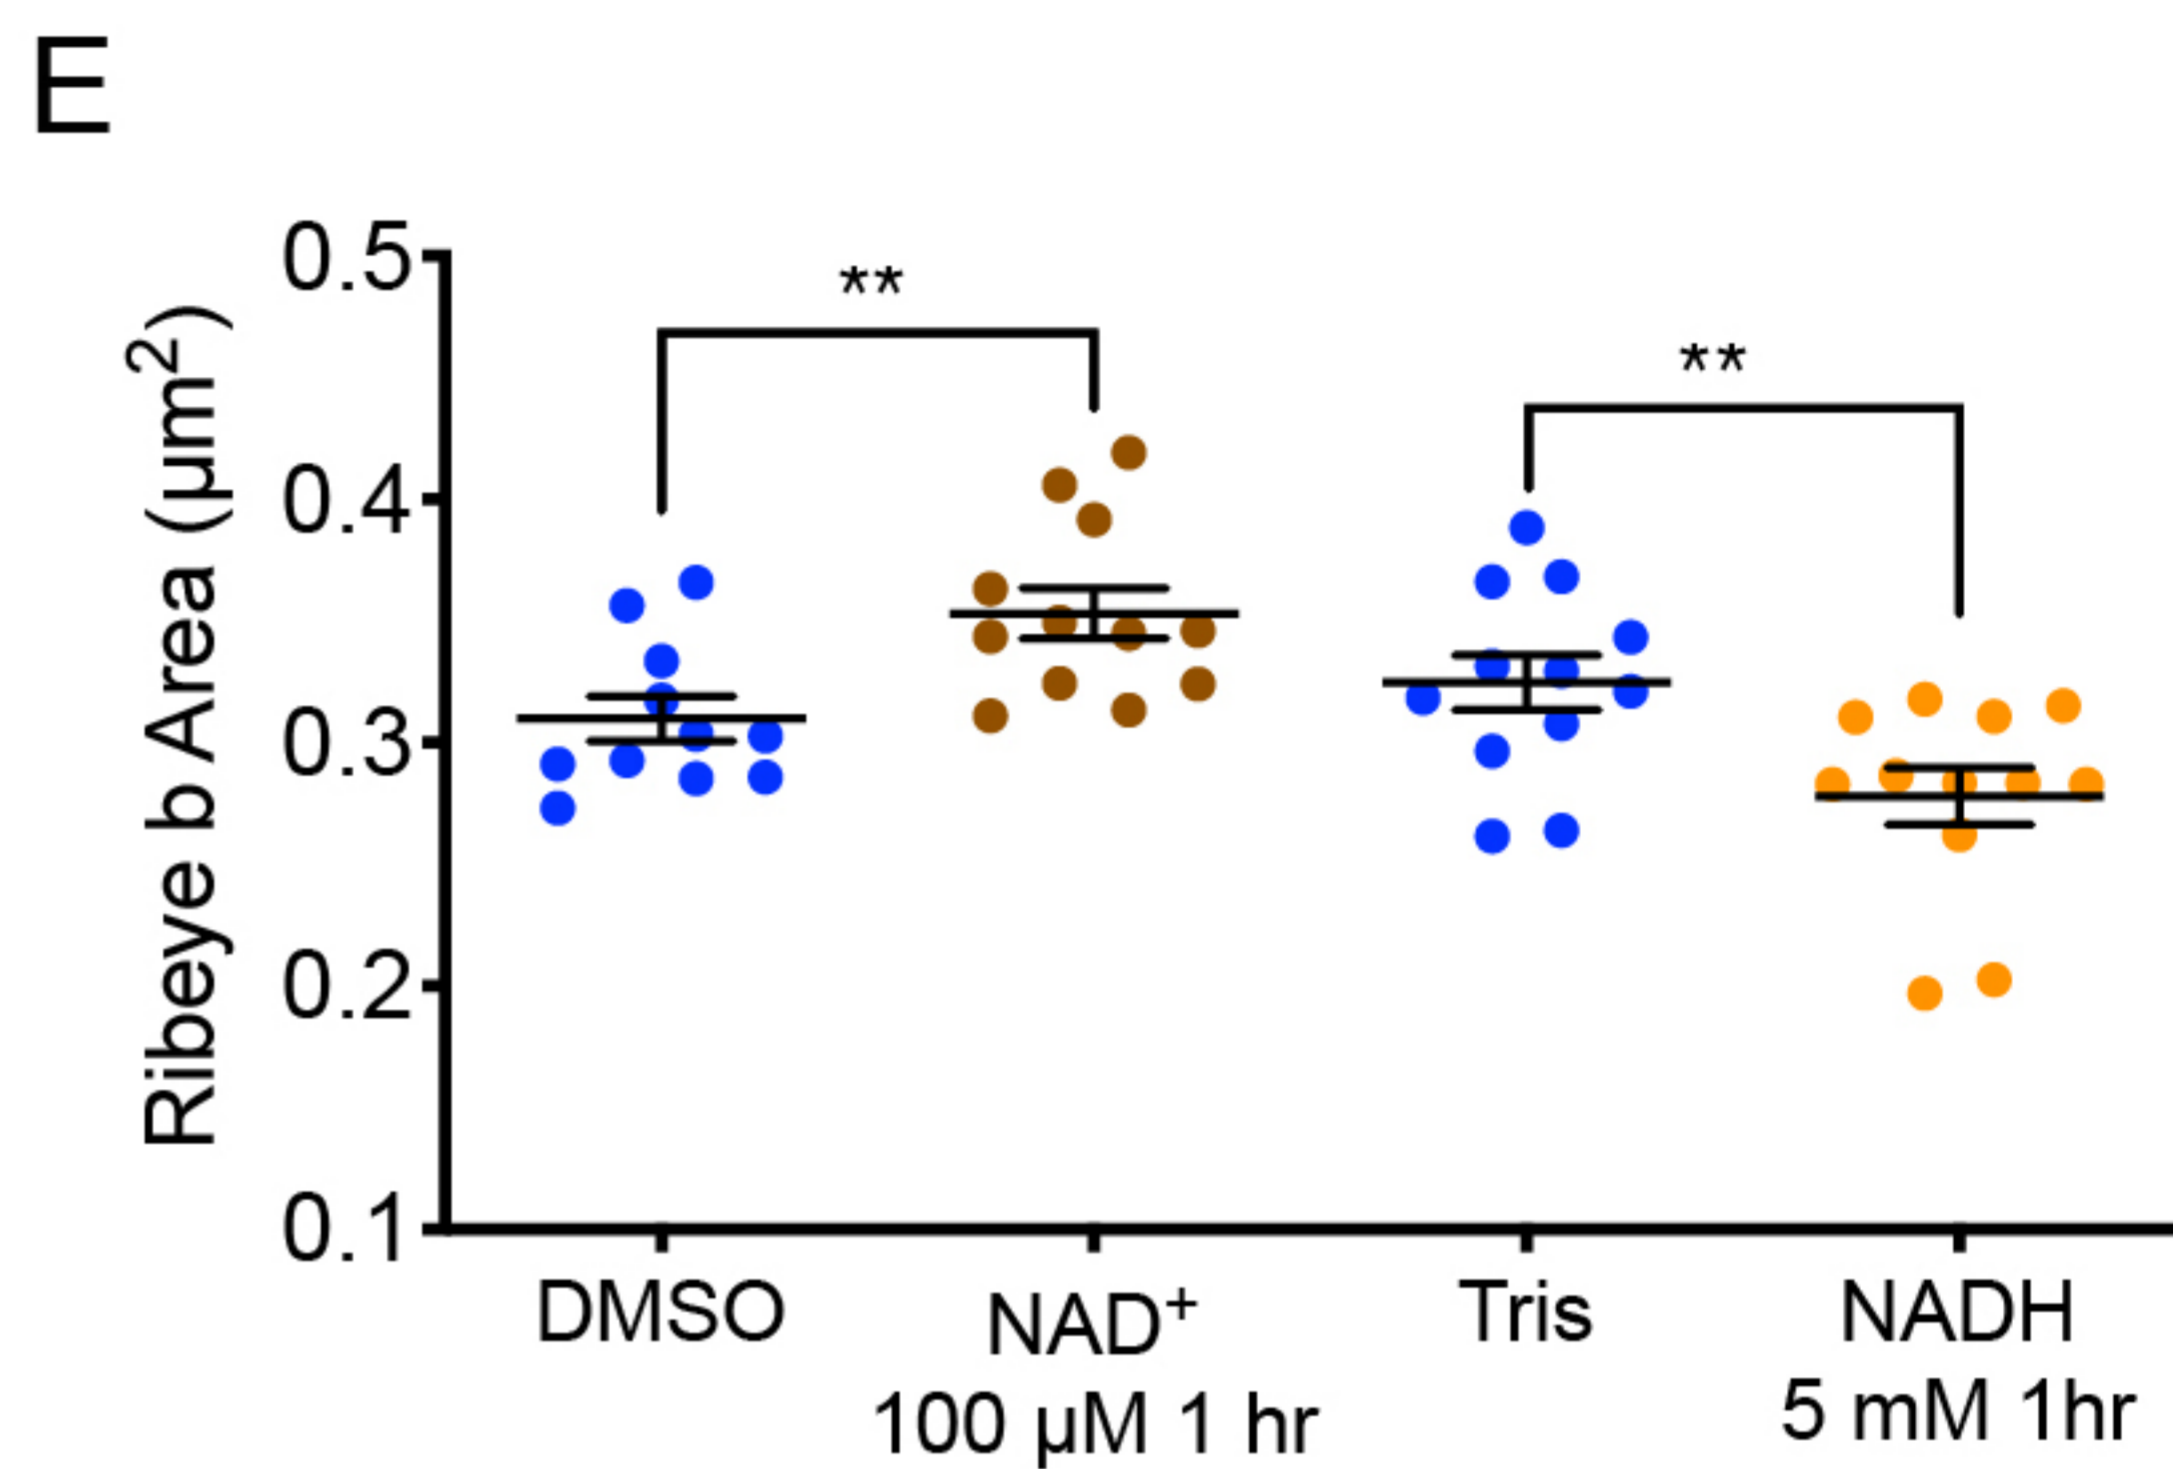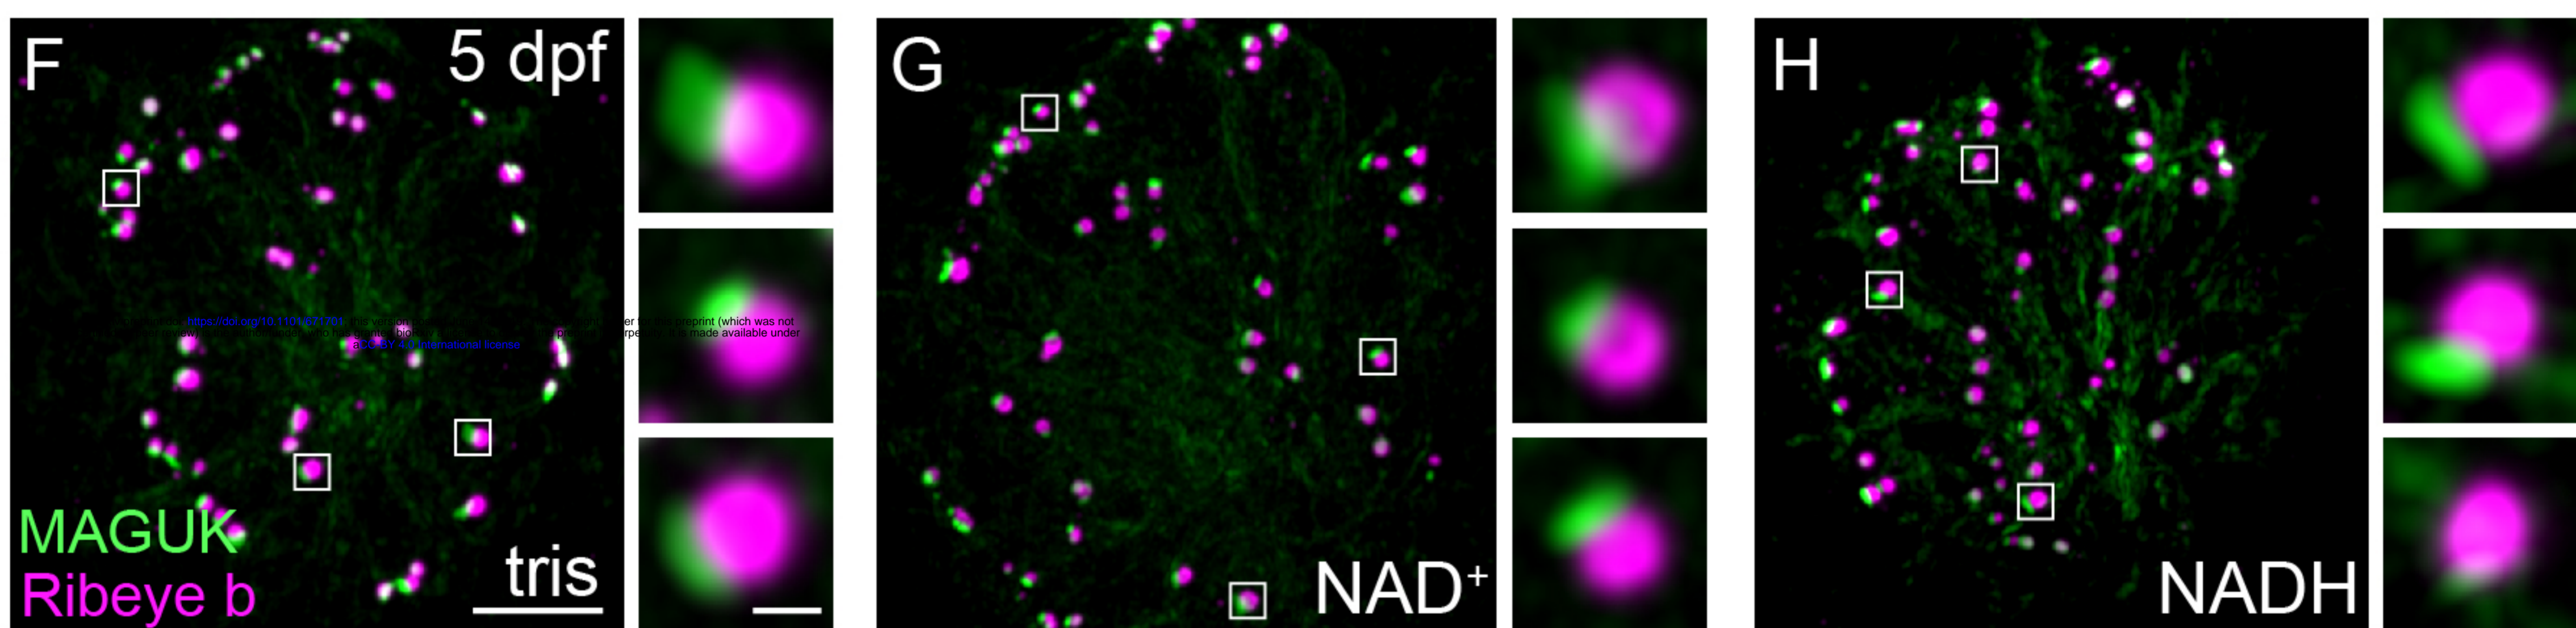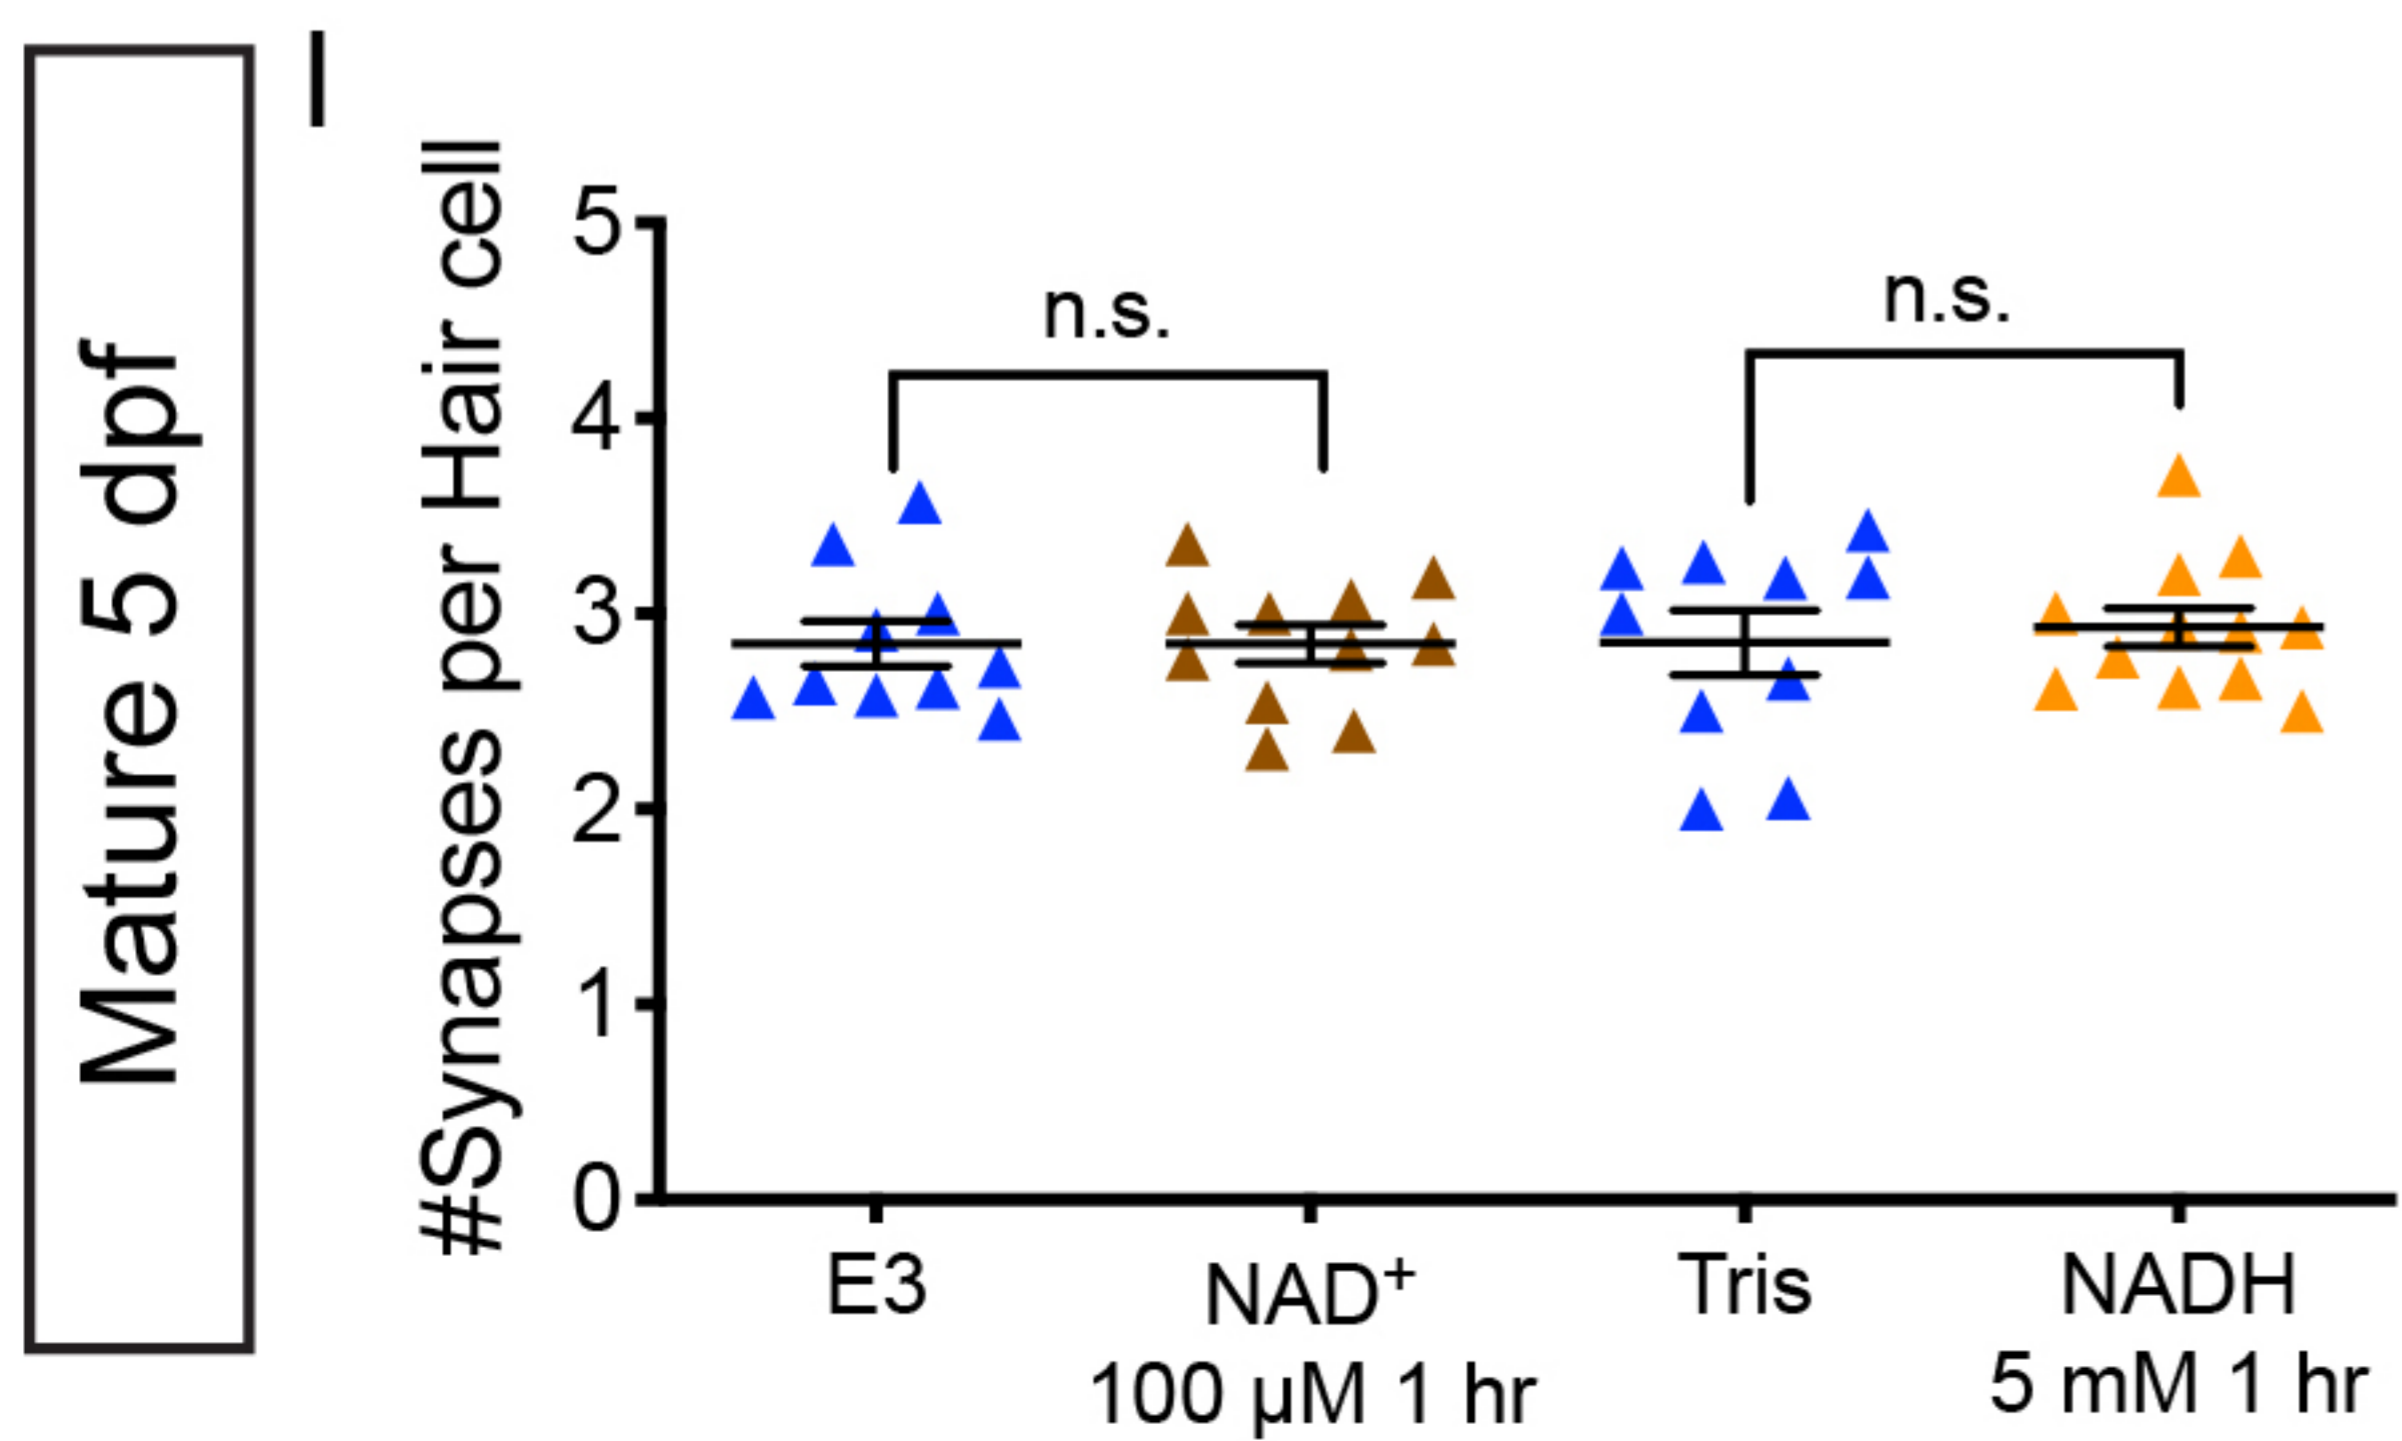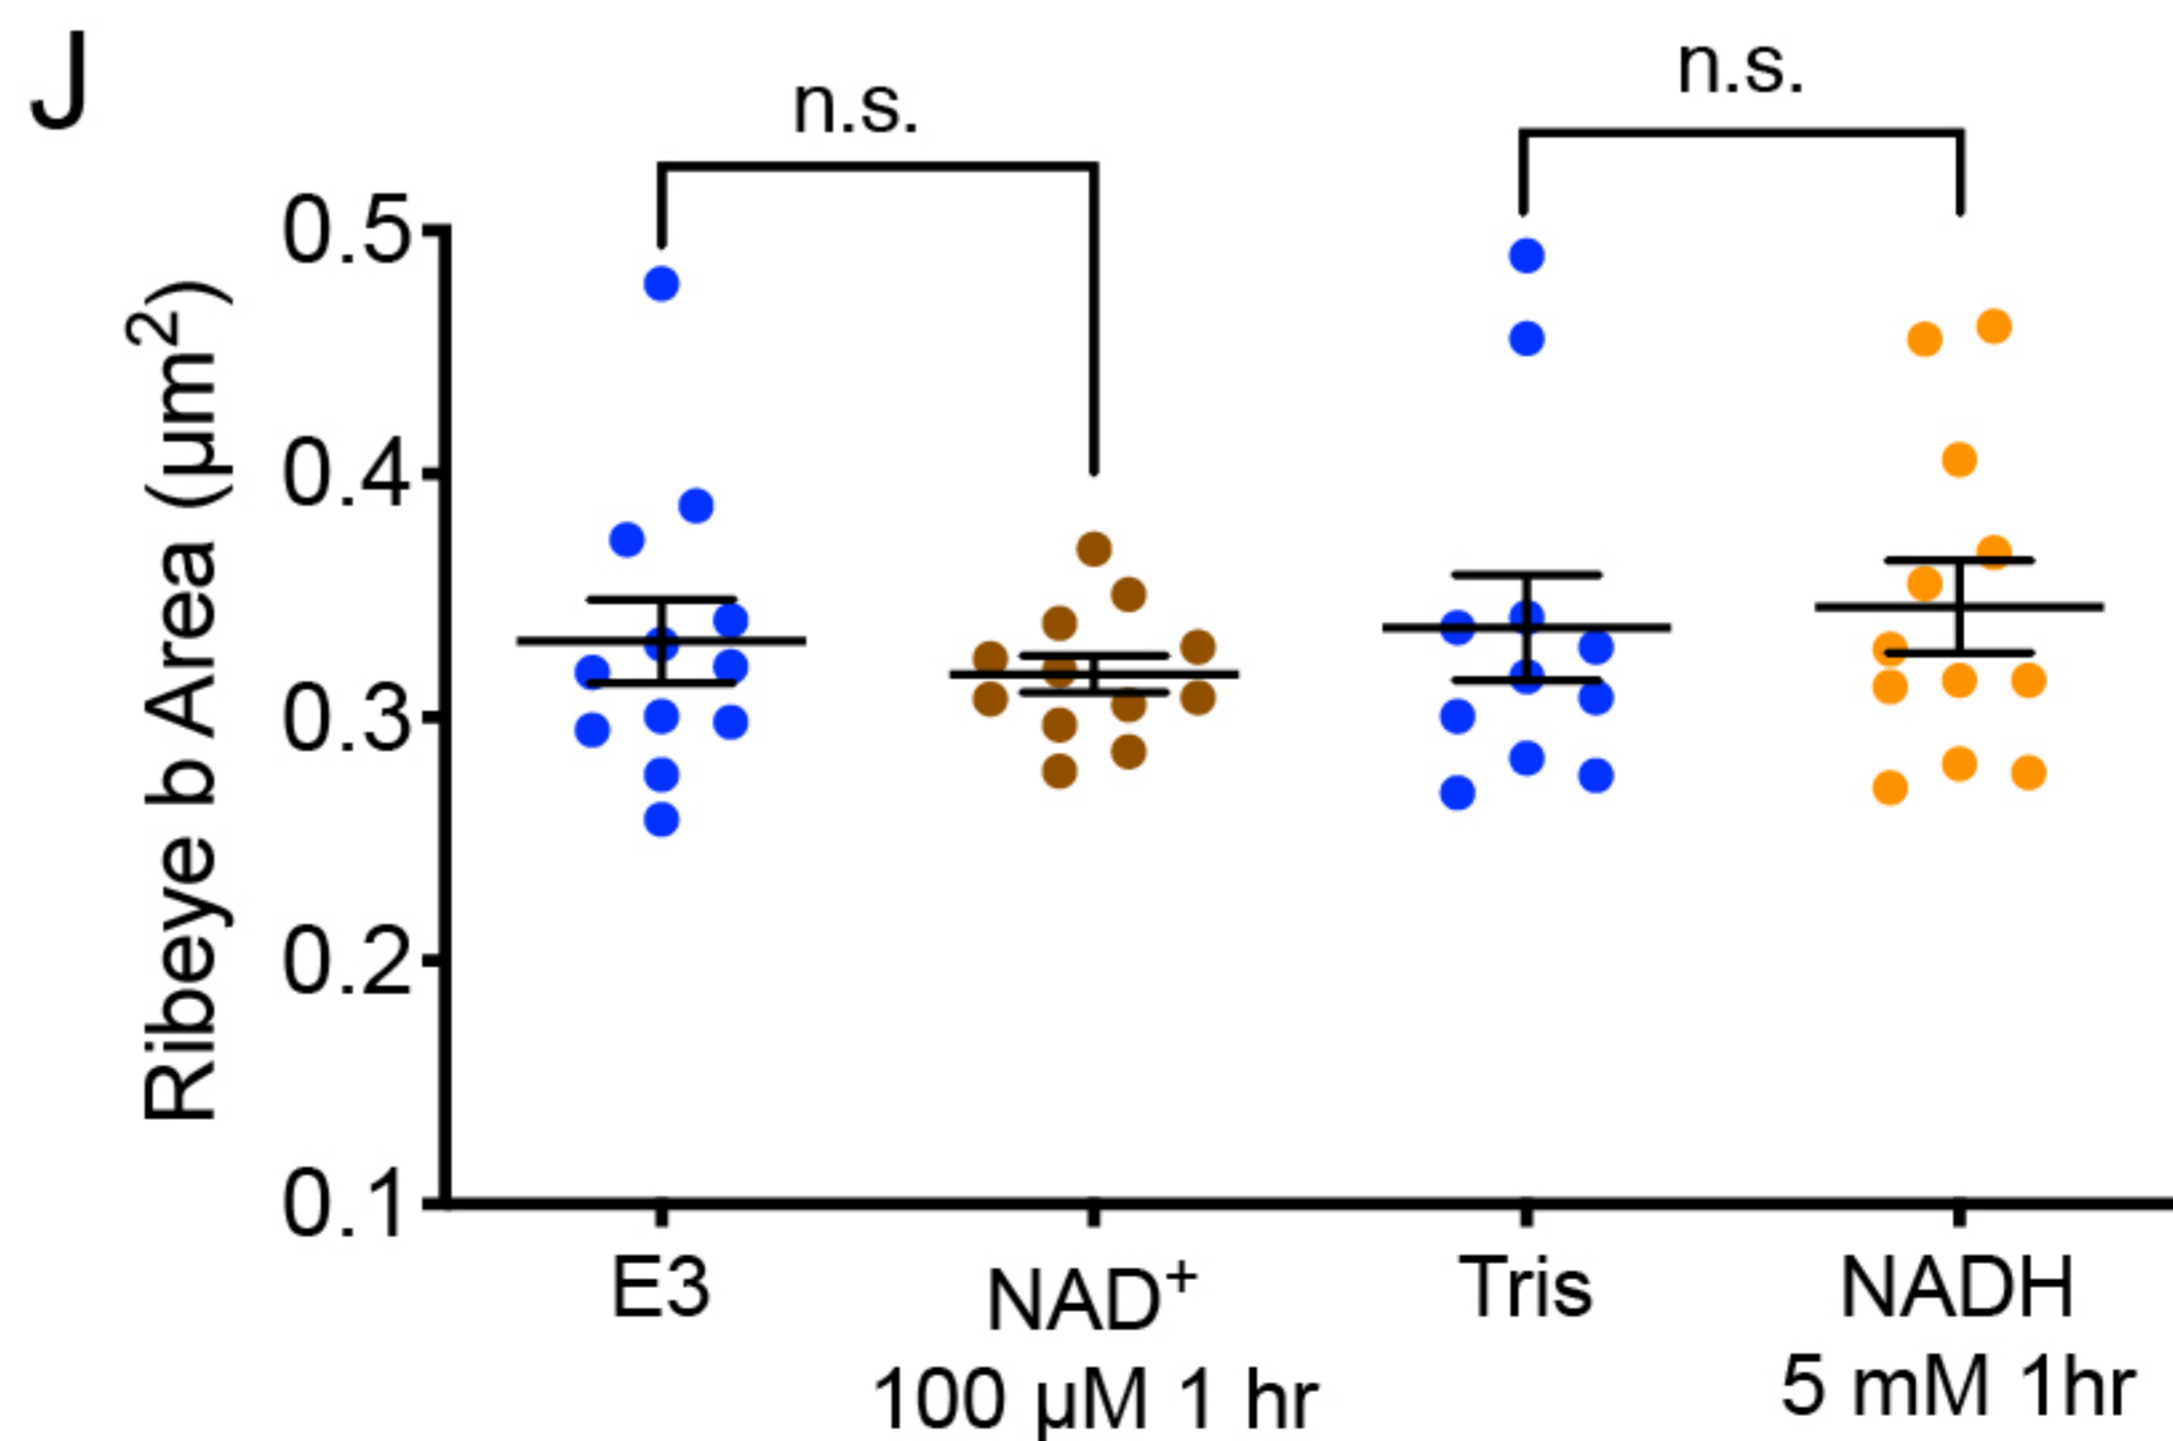

# A Developing hair cell

*Spontaneous*  
presynaptic influx  
& Mito- $\text{Ca}^{2+}$  uptake

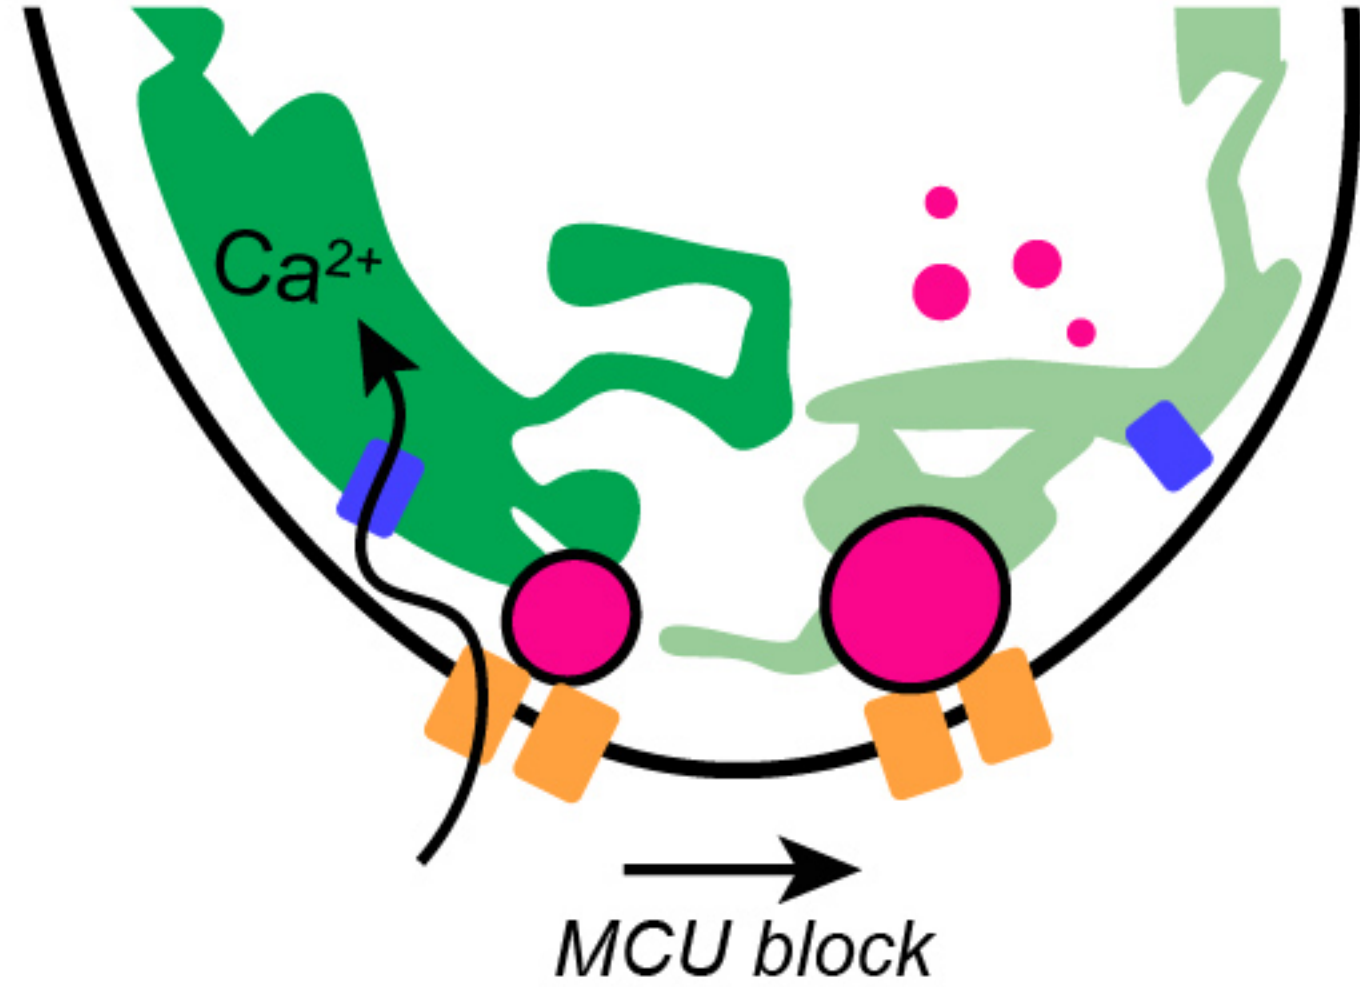

**Partial or complete MCU block**  
ribbon enlargement  
via NAD(H) redox

# B Mature hair cell

*Evoked*  
presynaptic influx  
& Mito- $\text{Ca}^{2+}$  uptake

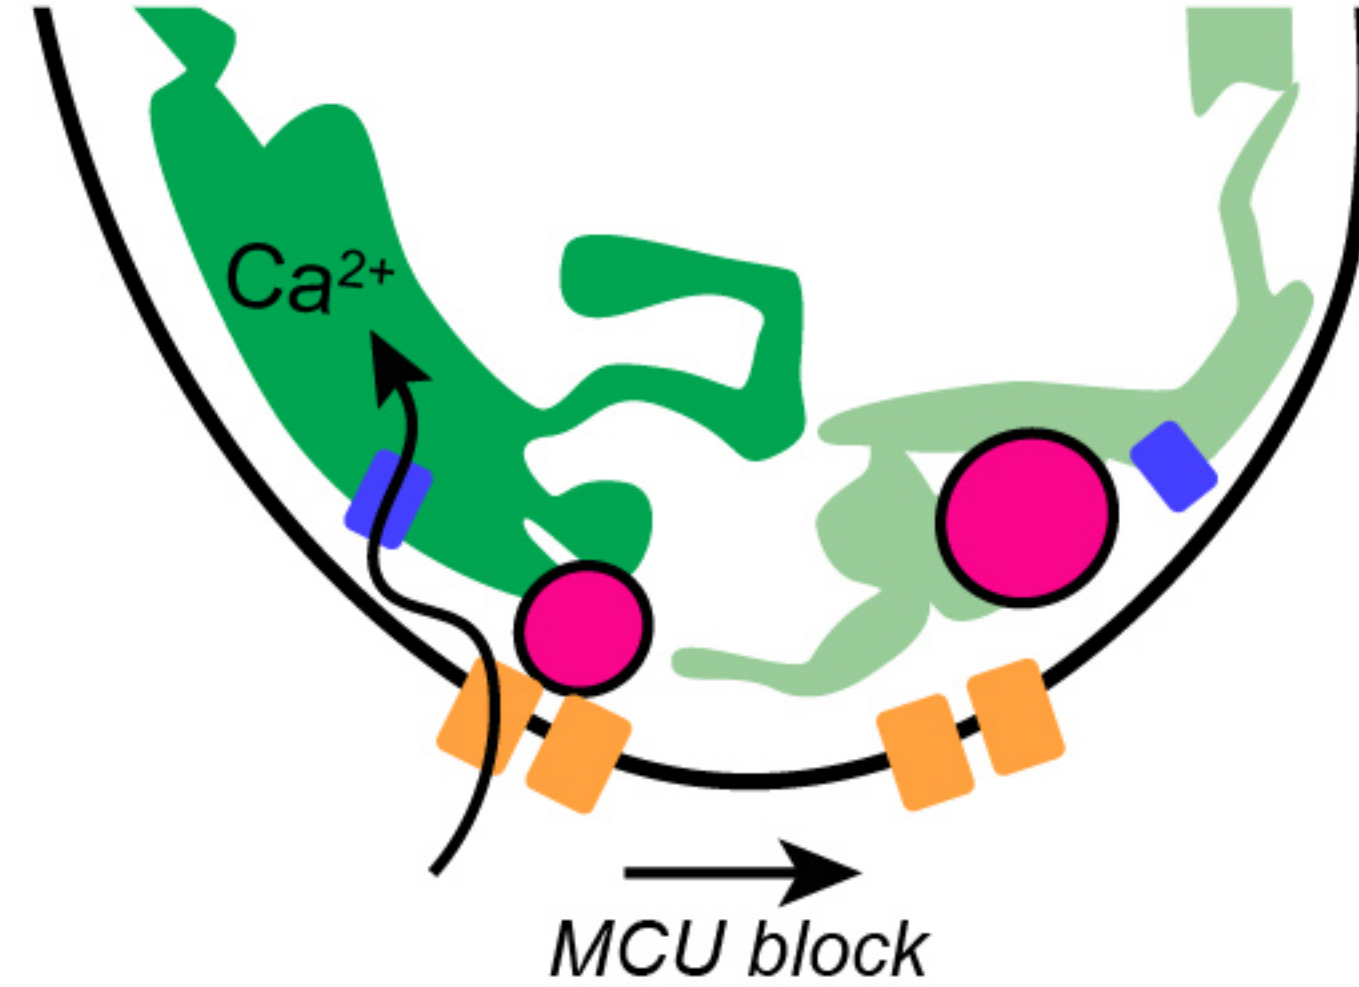

**Partial MCU block**  
presynapse function  
loss

**Complete MCU block**  
ribbon enlargement  
synapse loss

**blue** MCU  
**orange**  $\text{Ca}_v1.3$   
**green** mitochondria  
**magenta** ribbon/presynapse



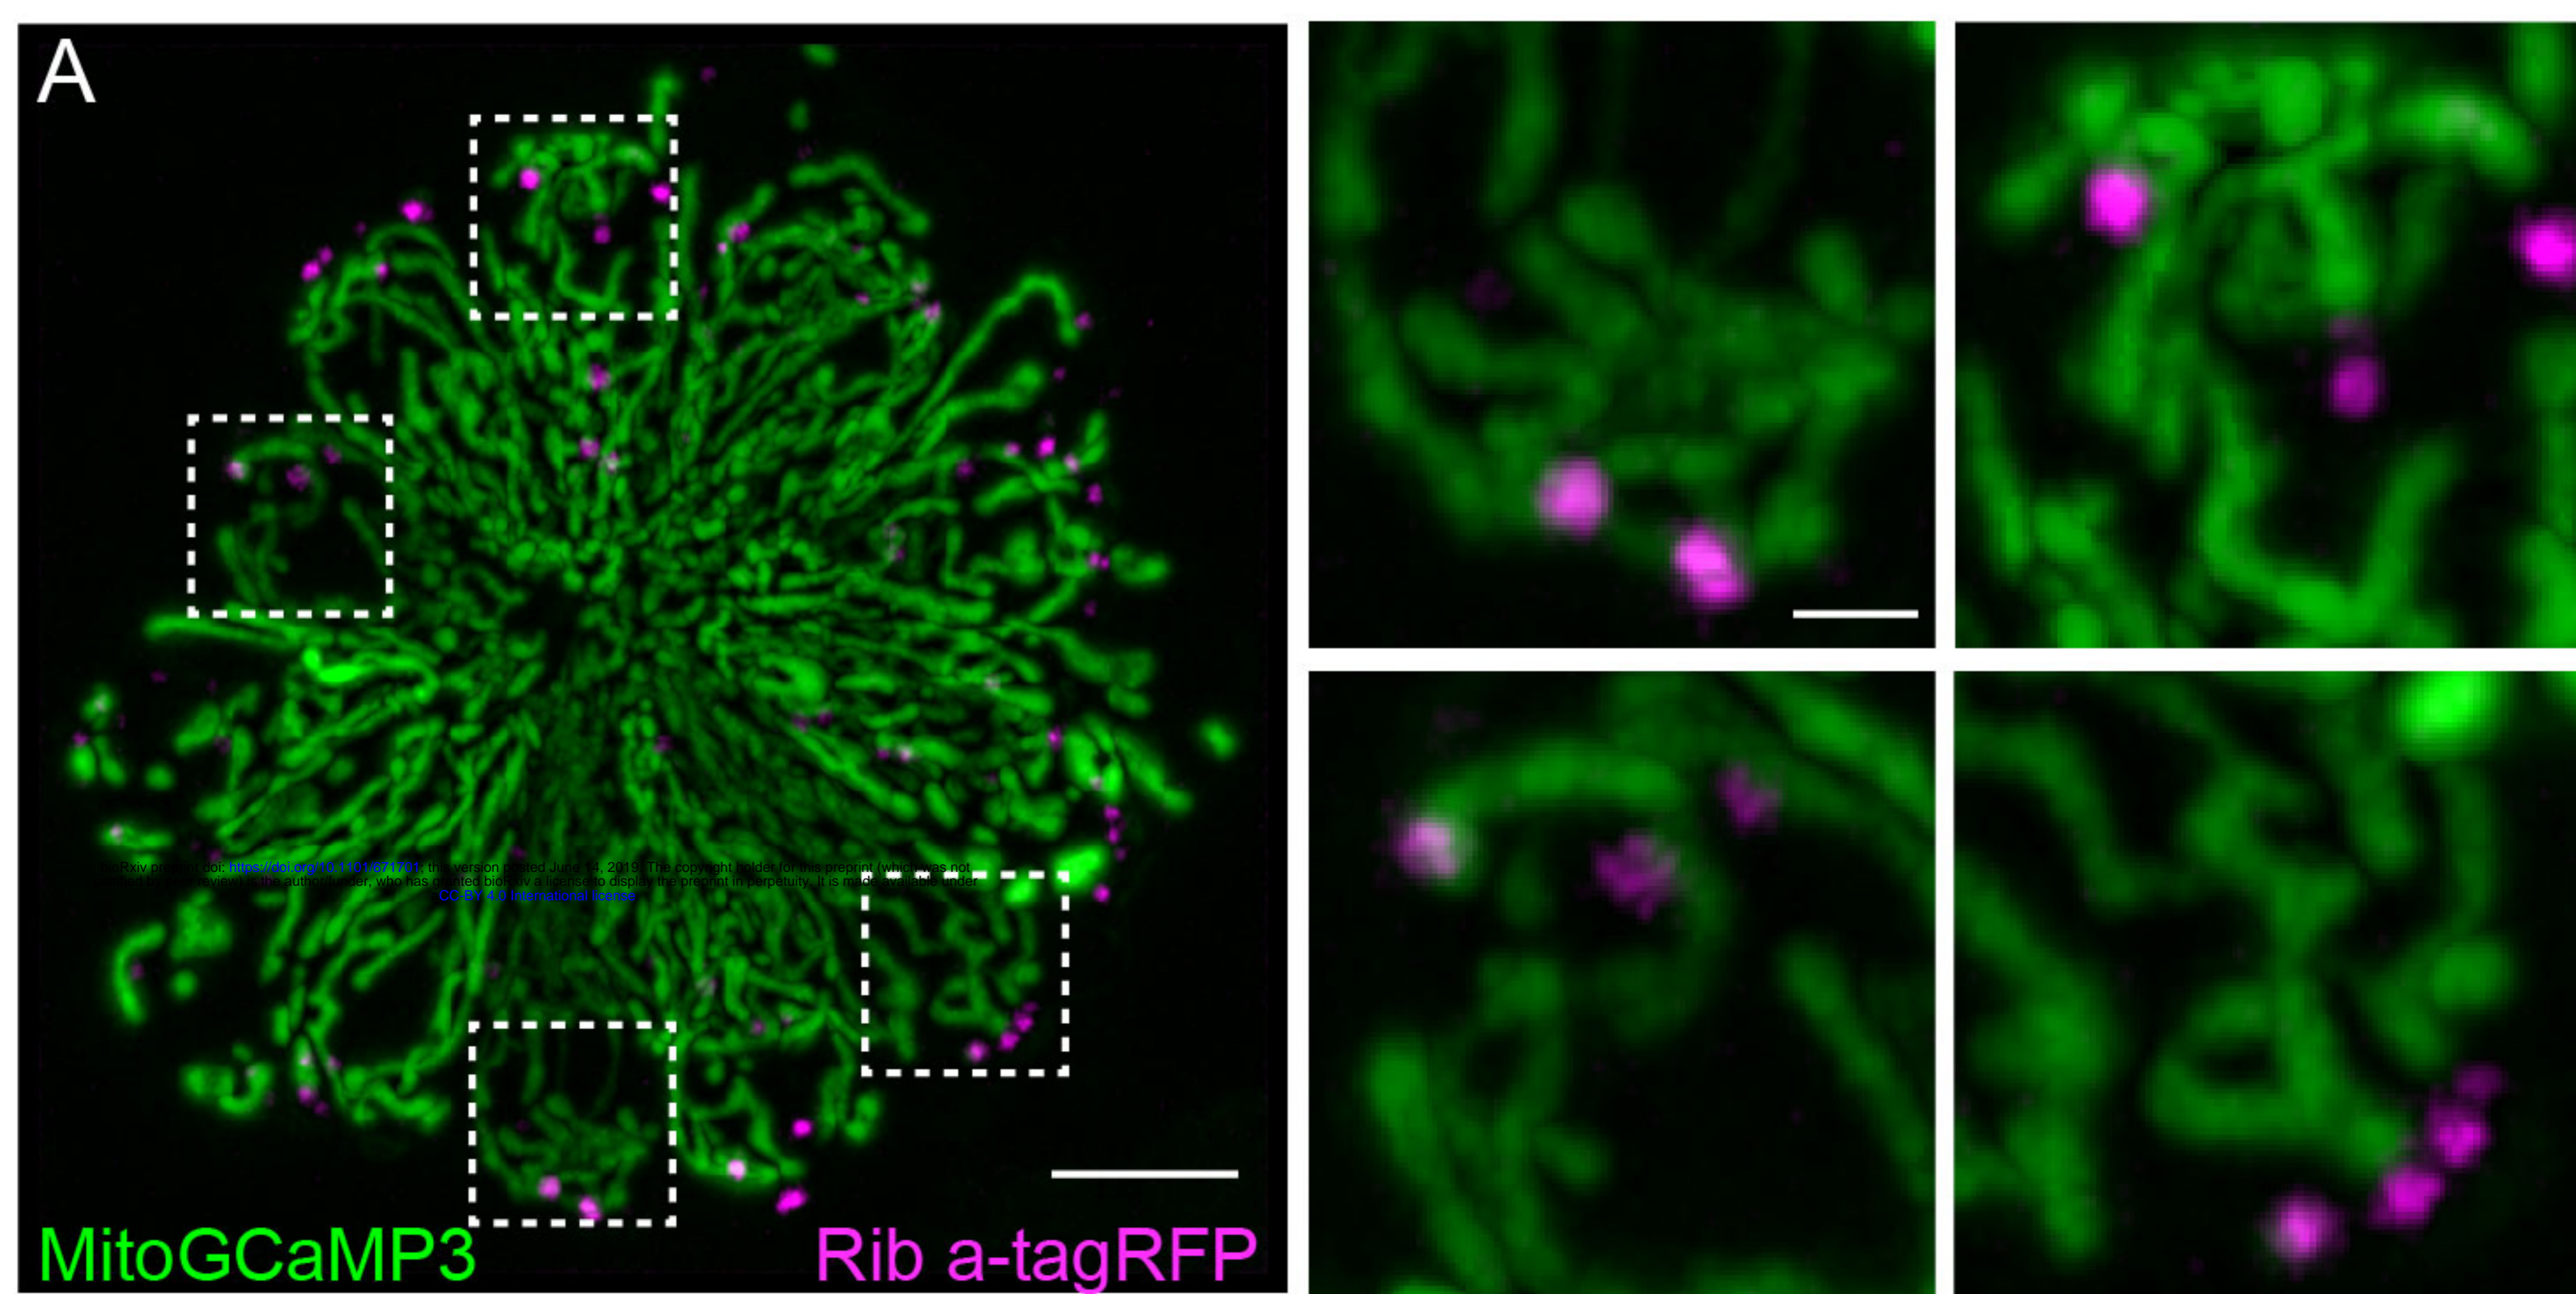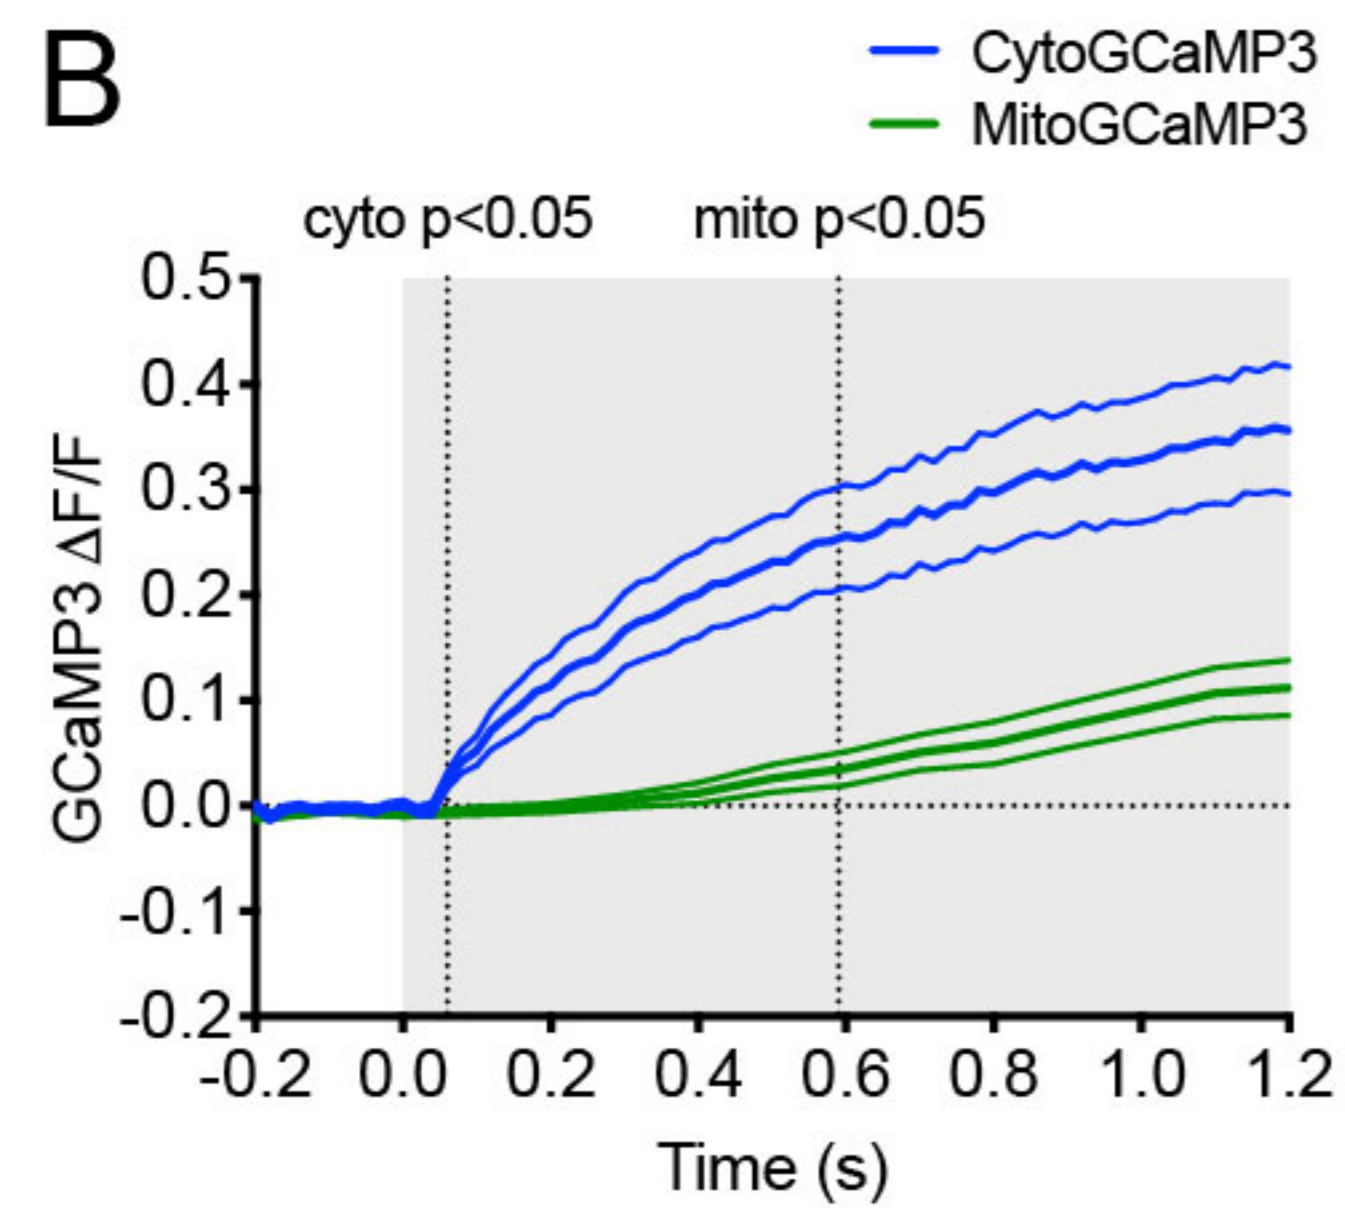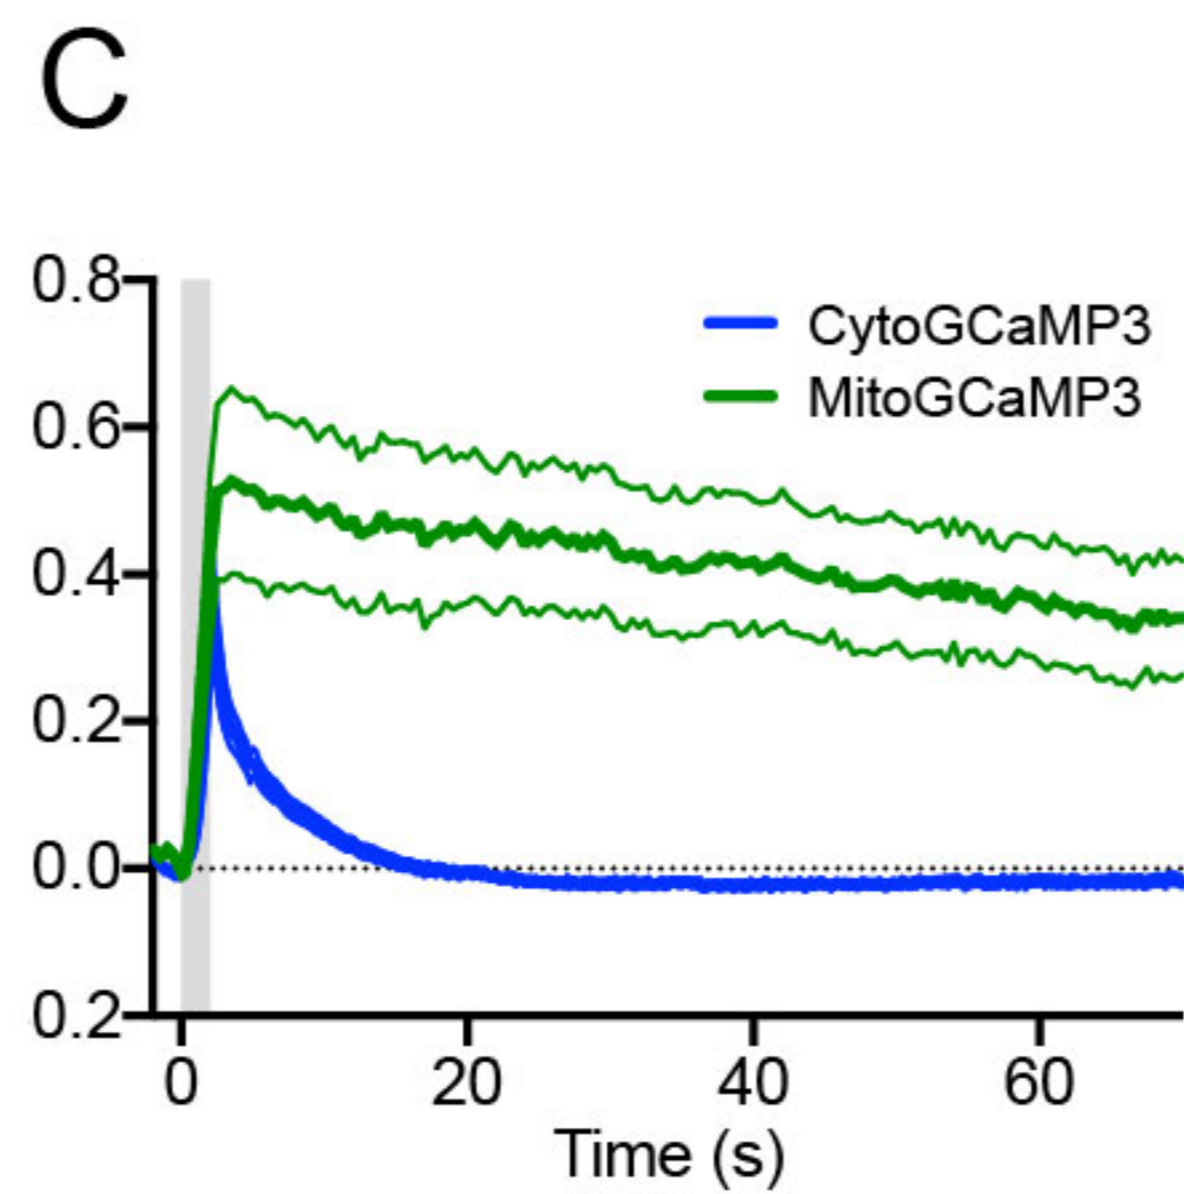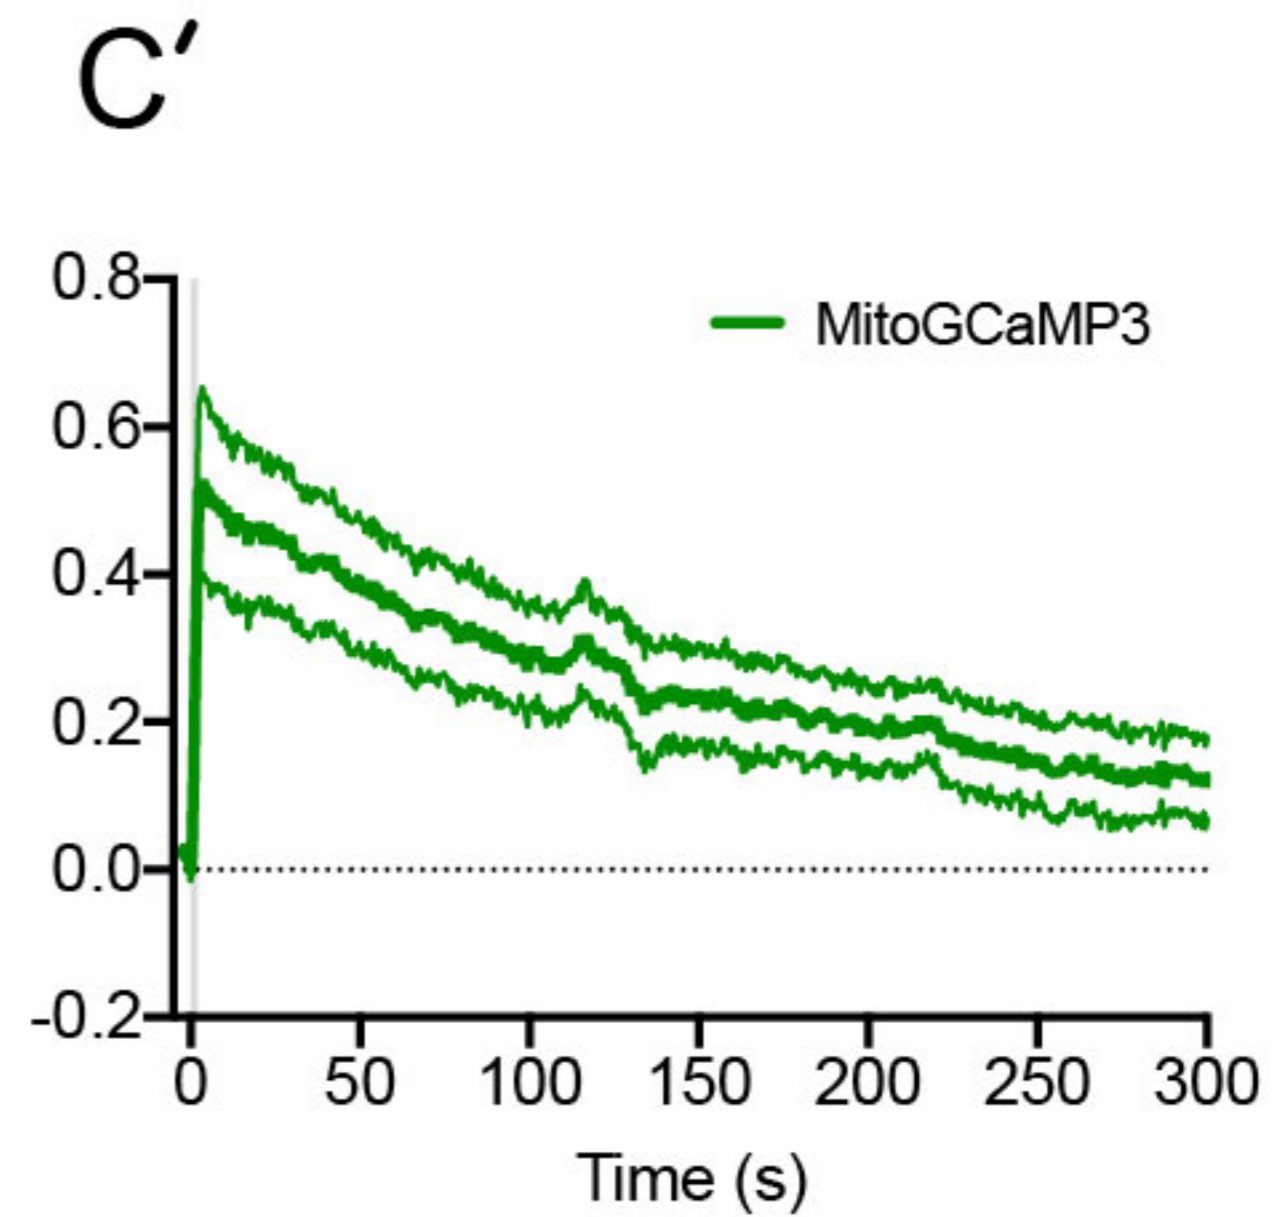

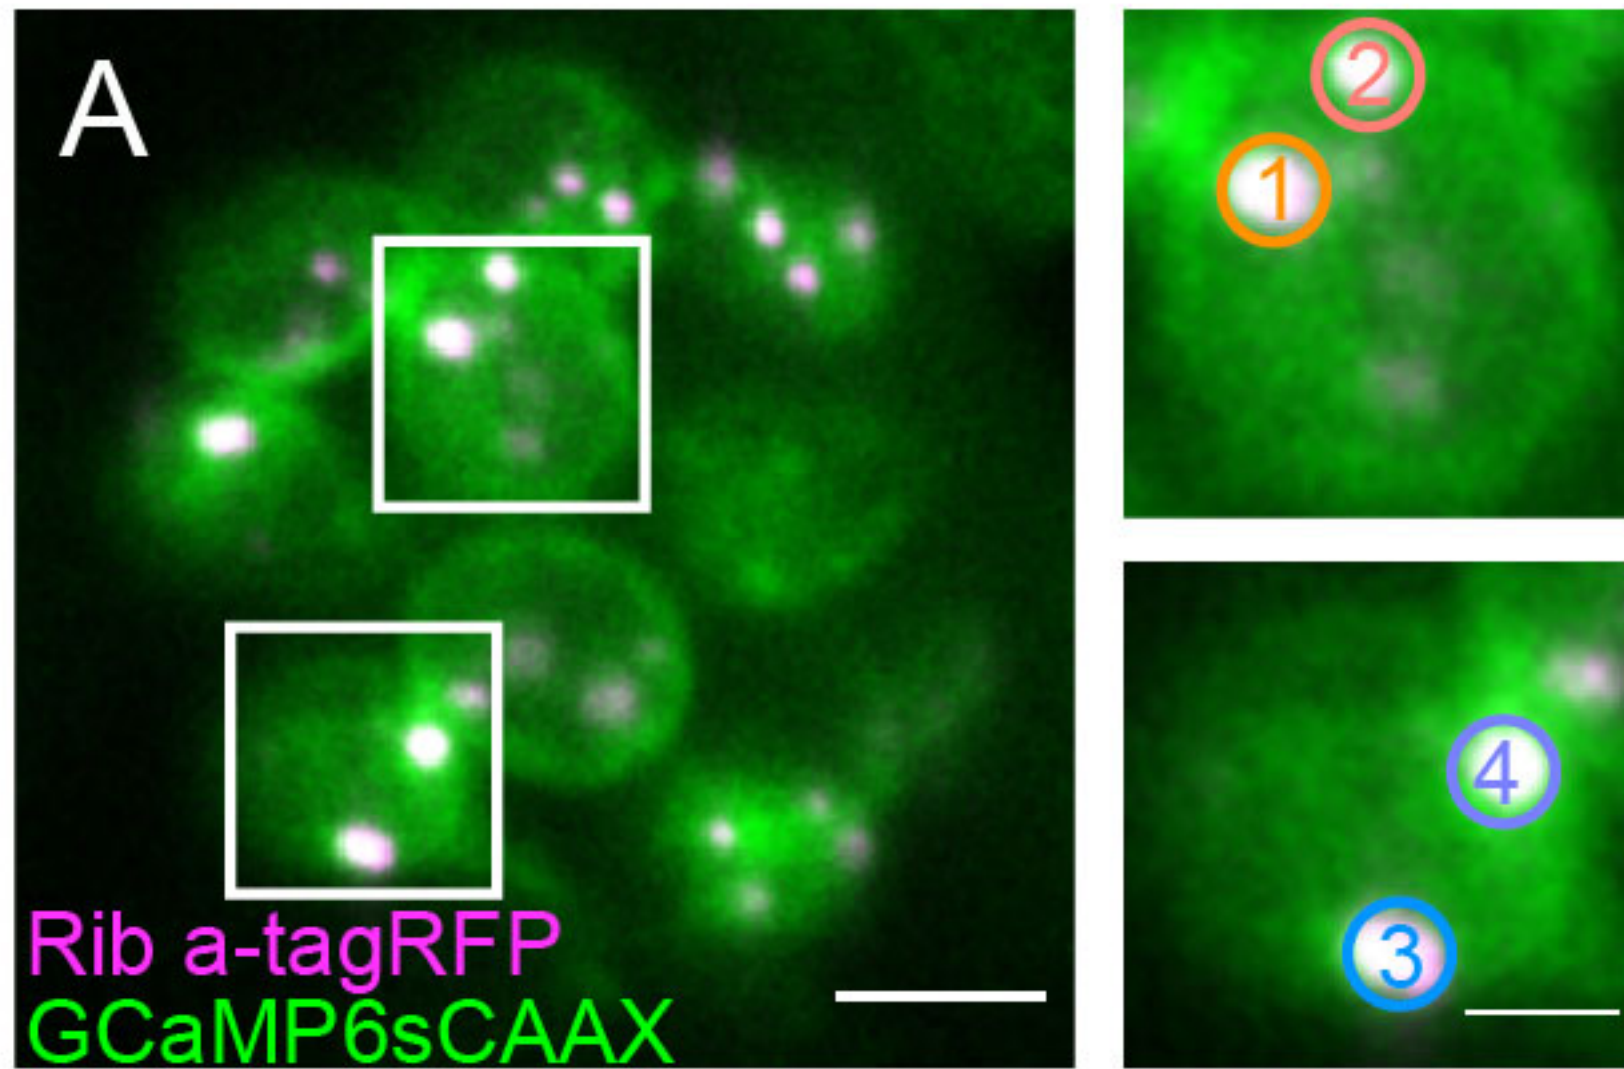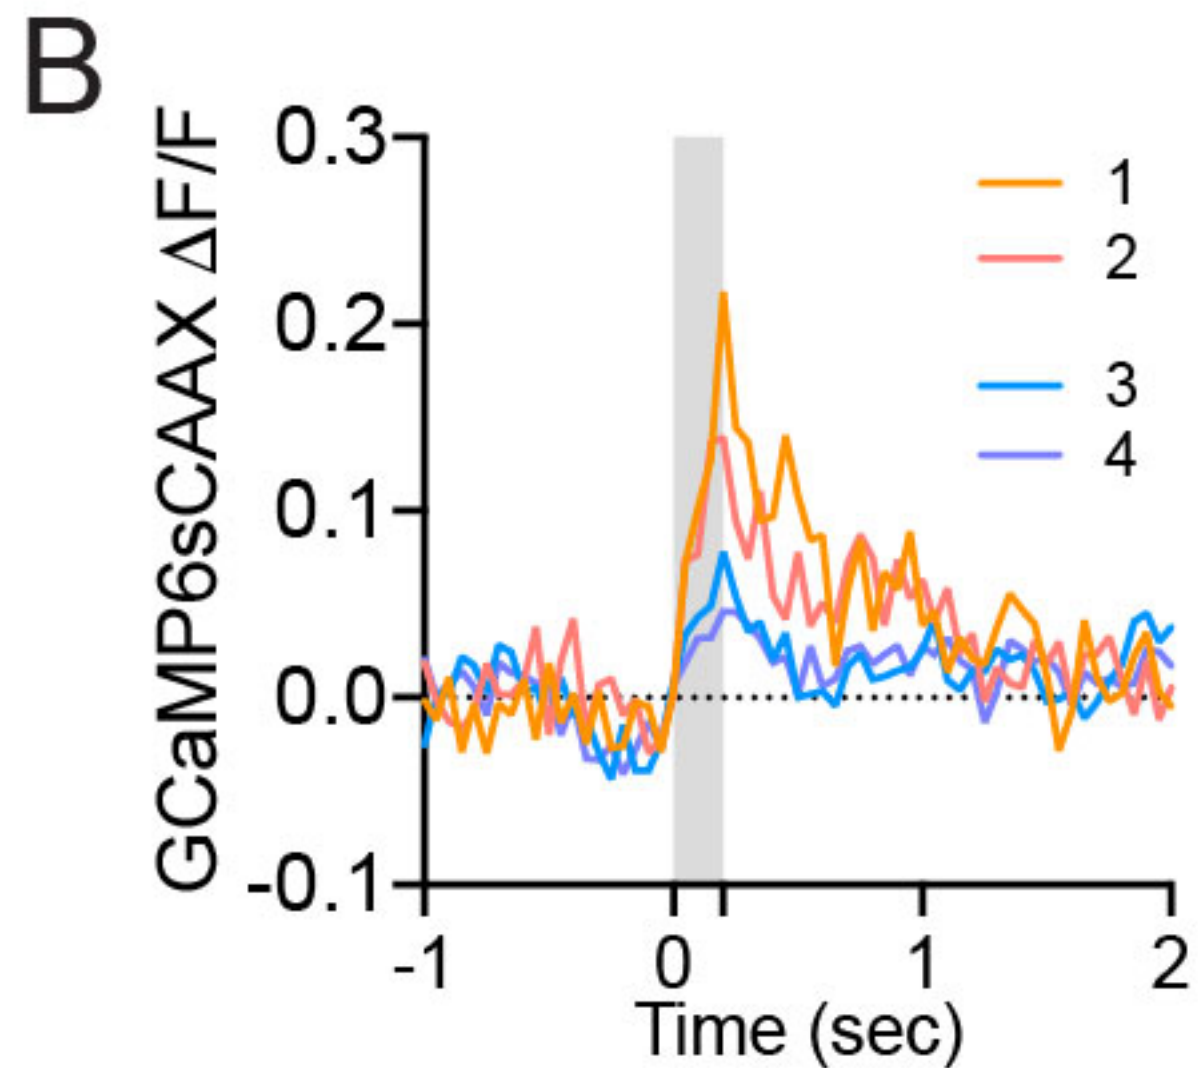

5 dpf mature

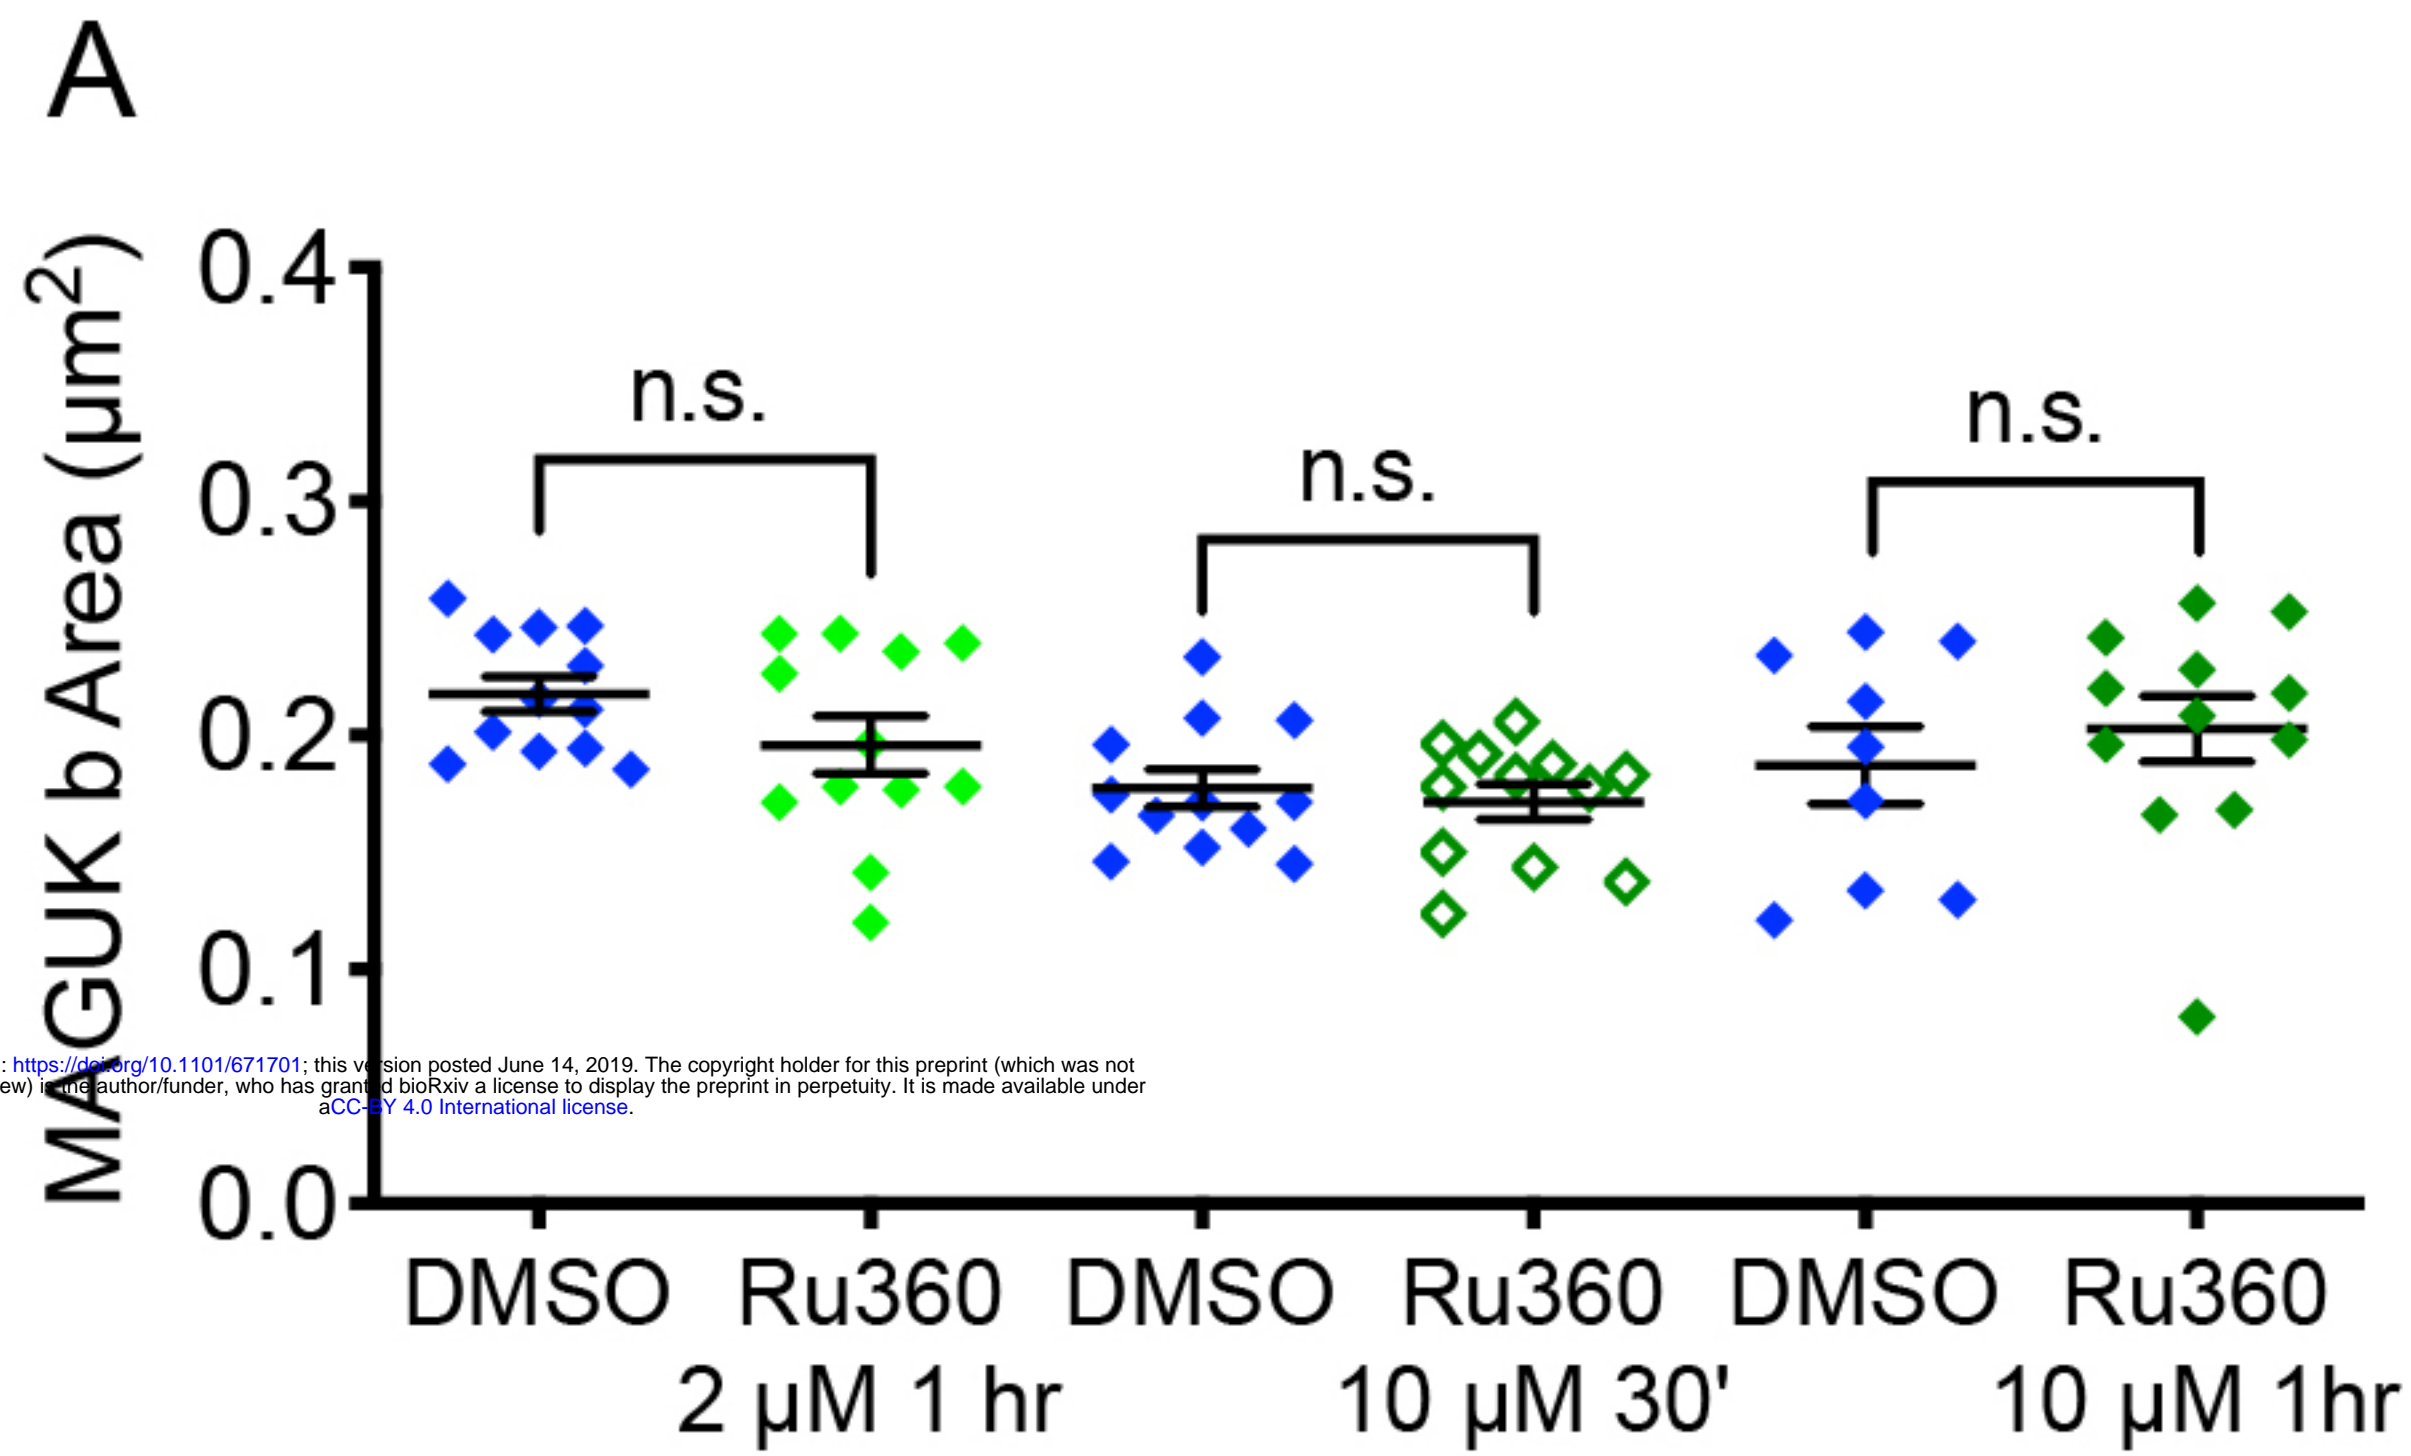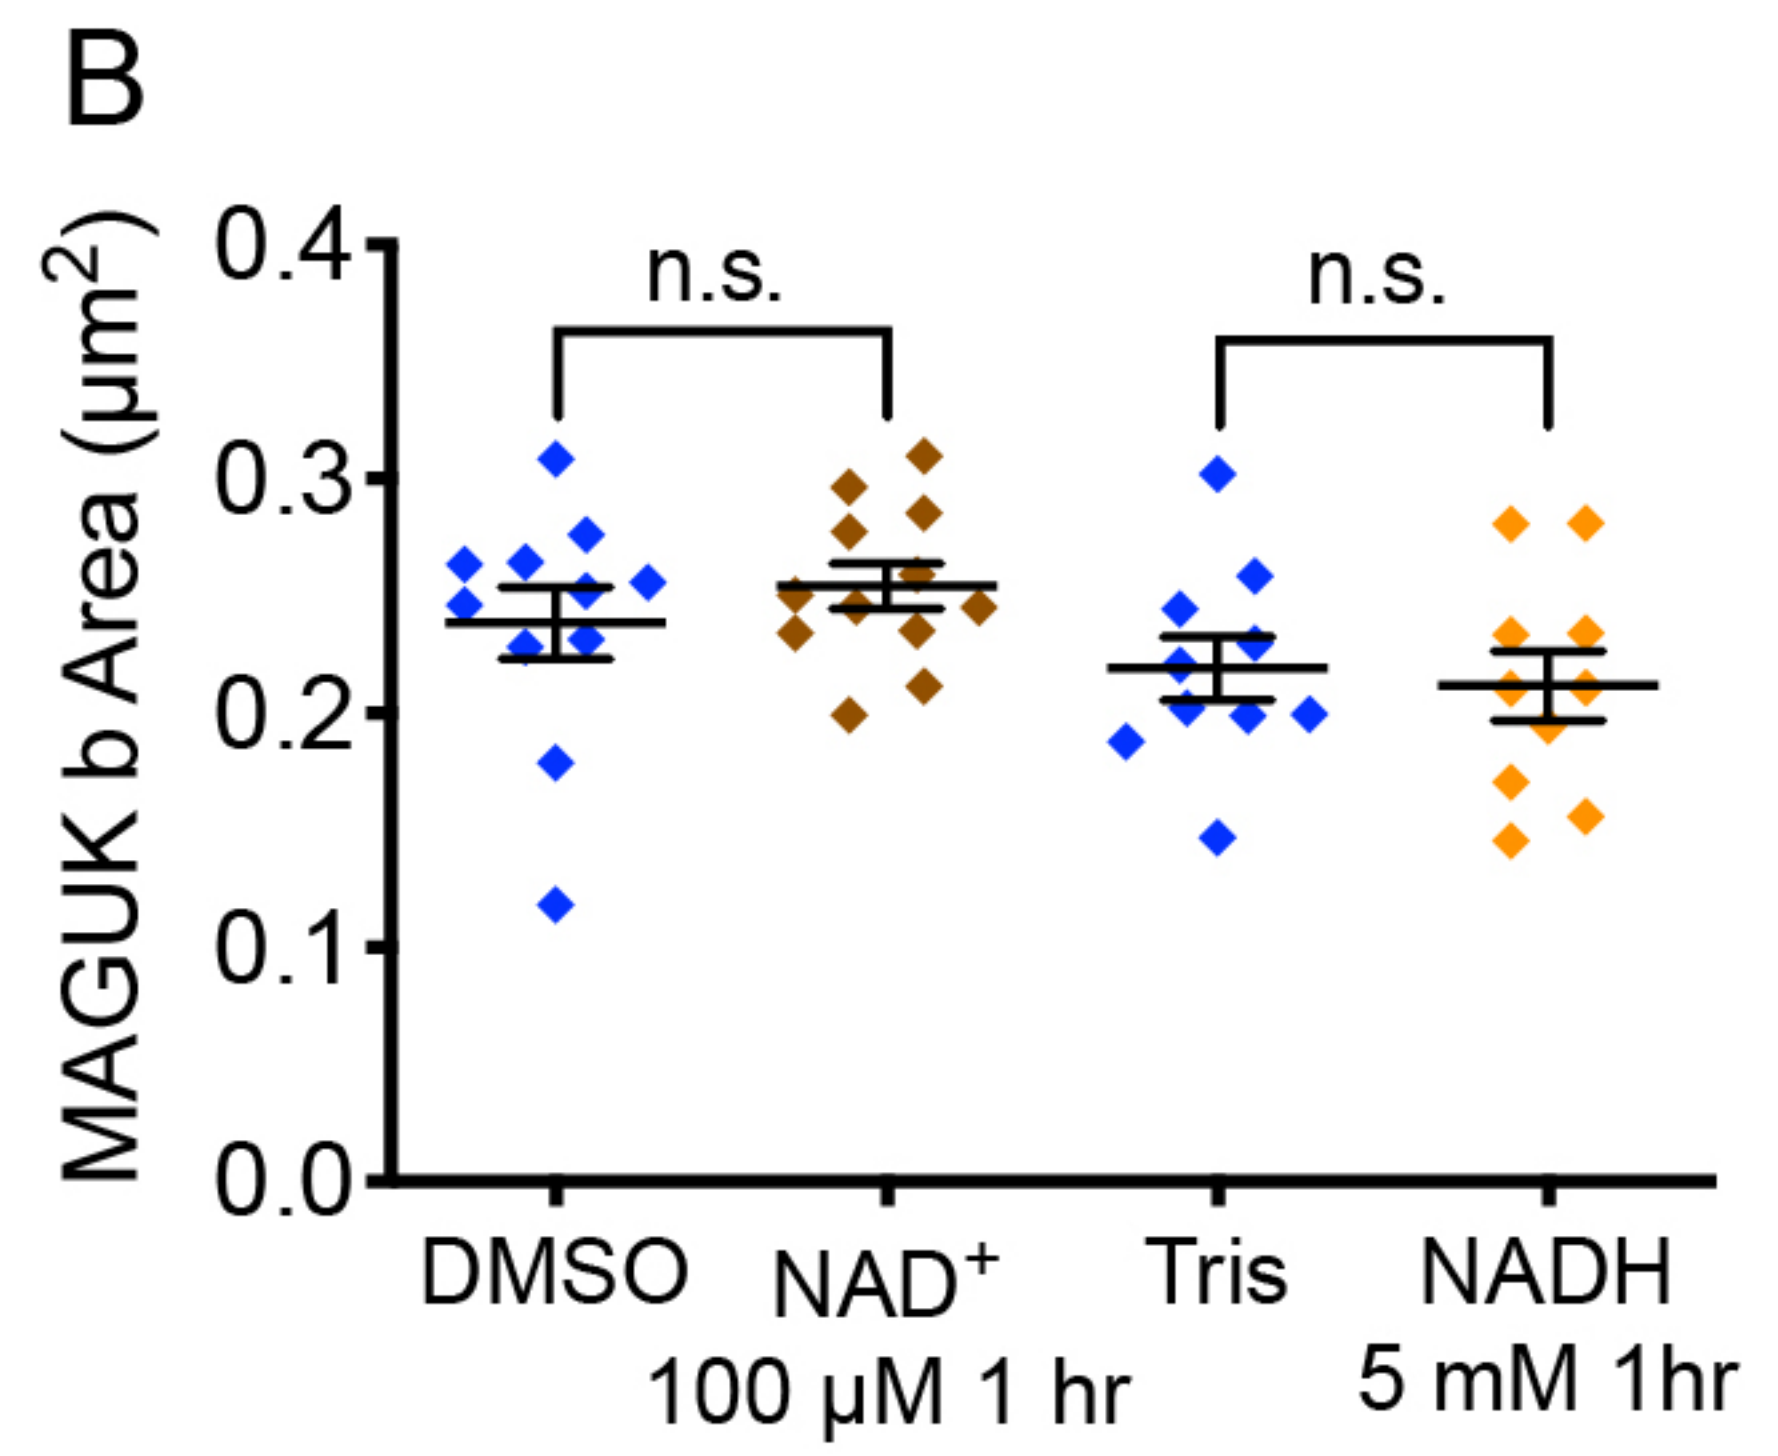

3 dpf immature

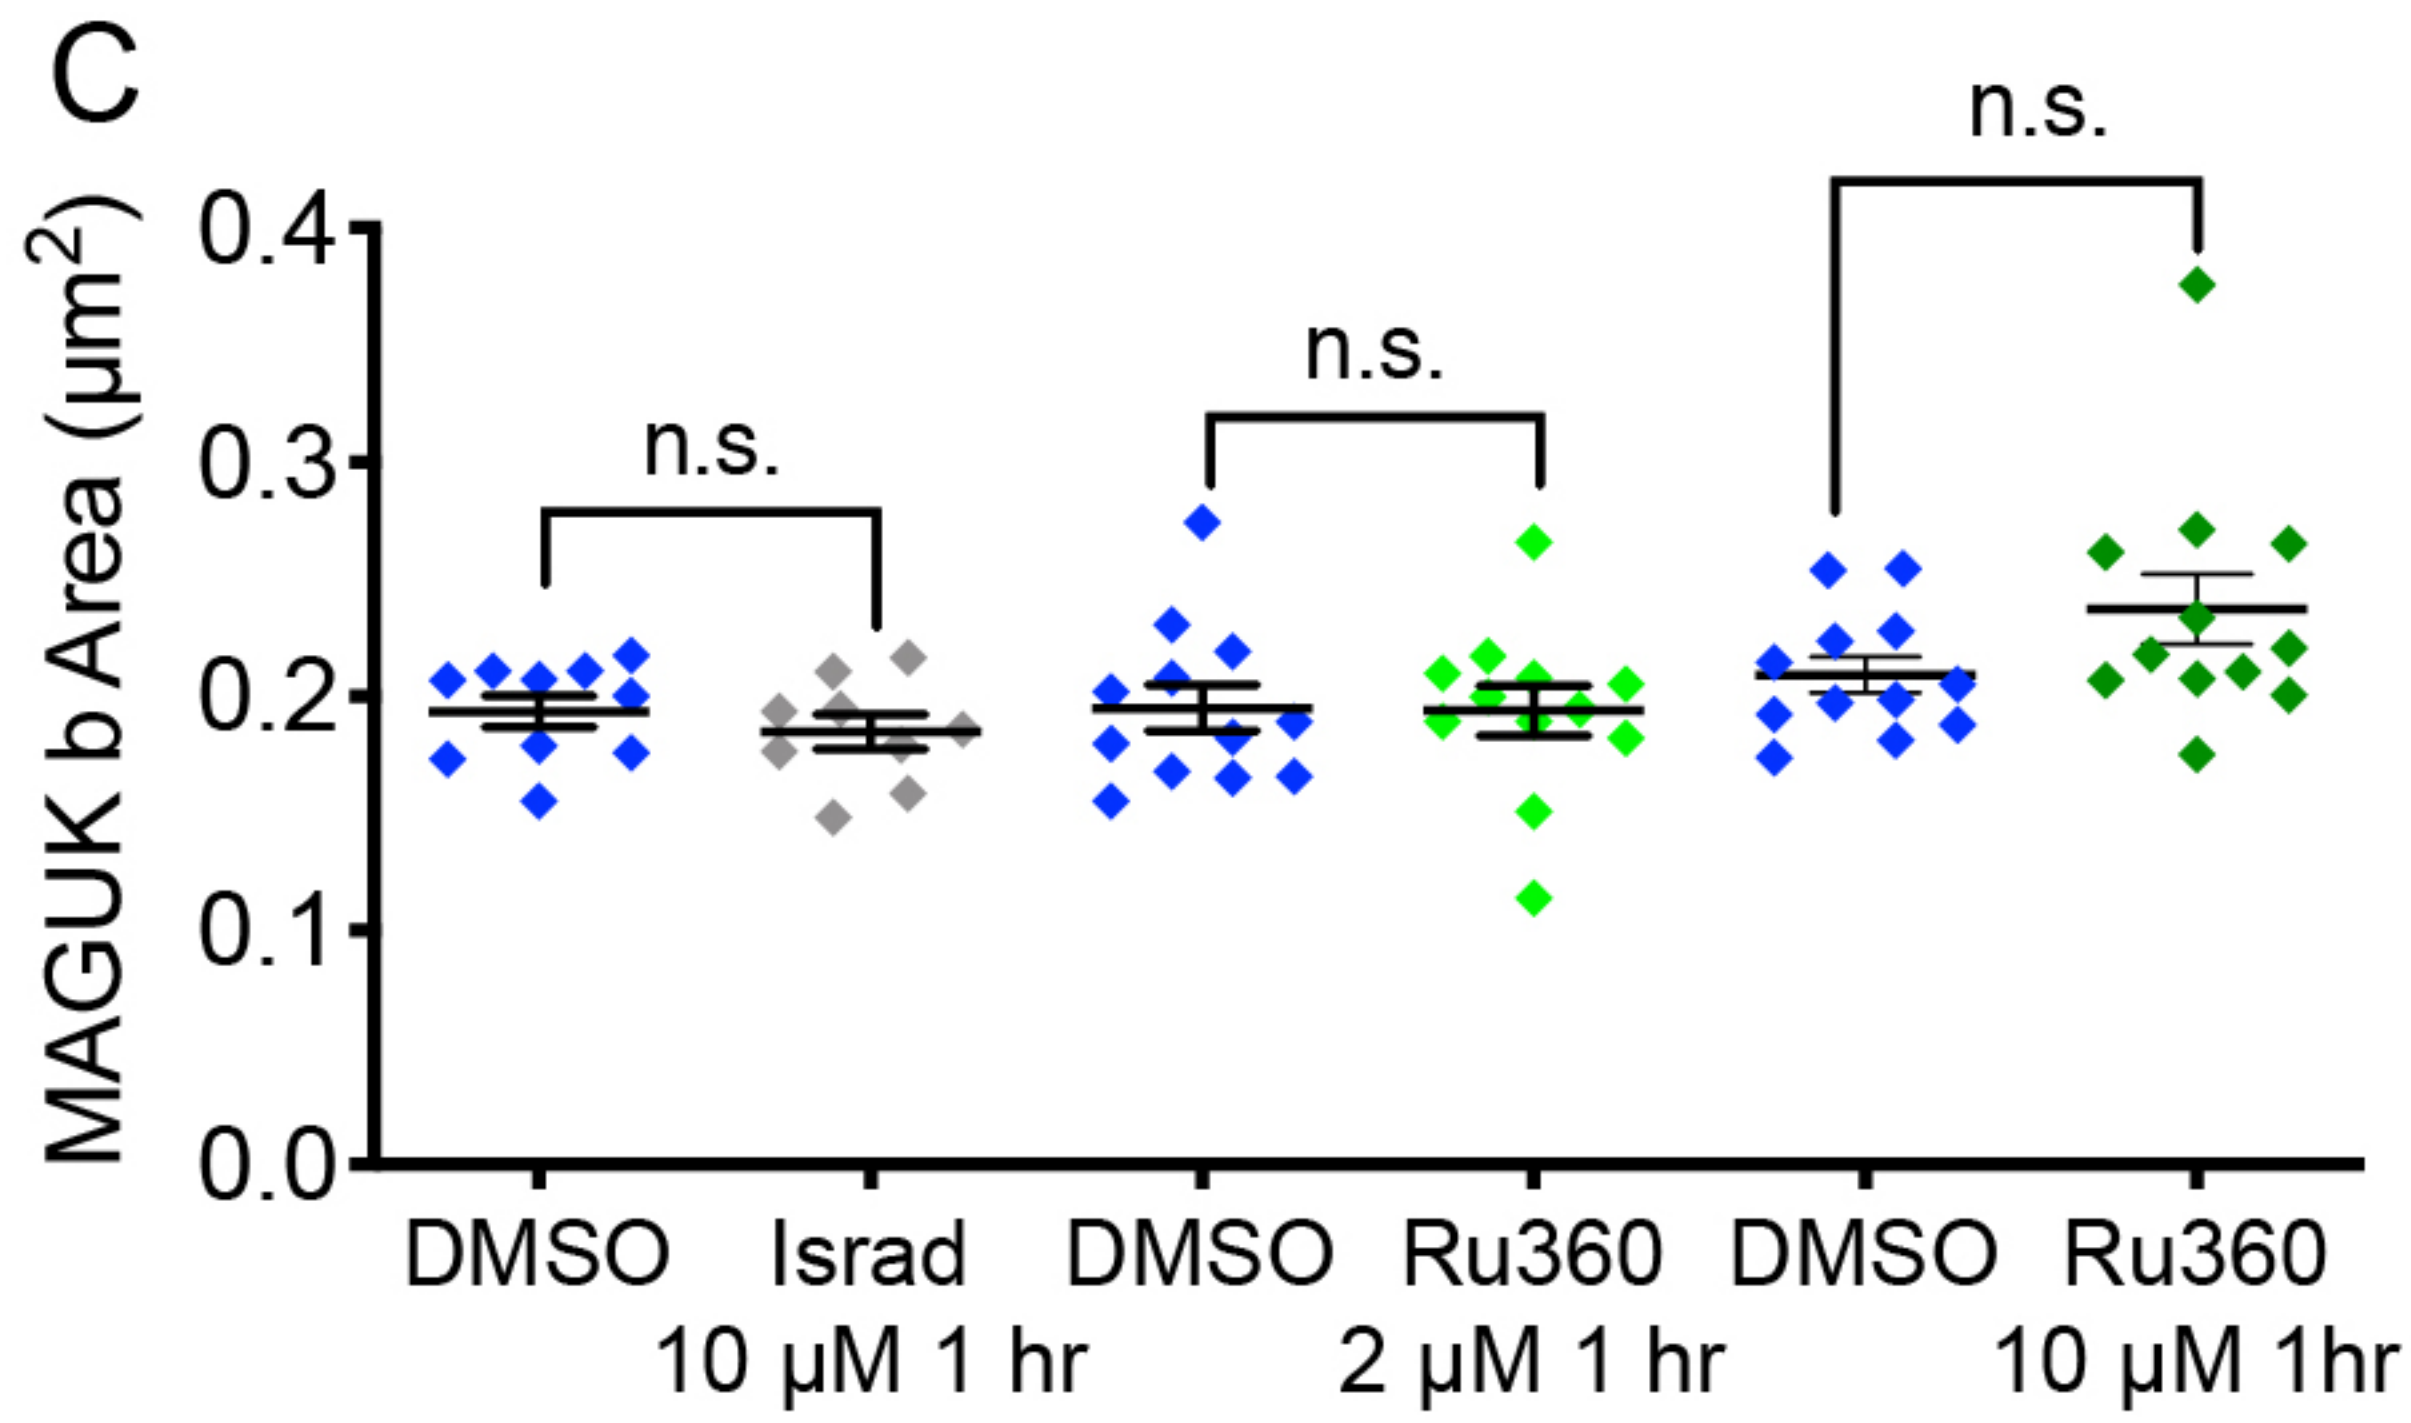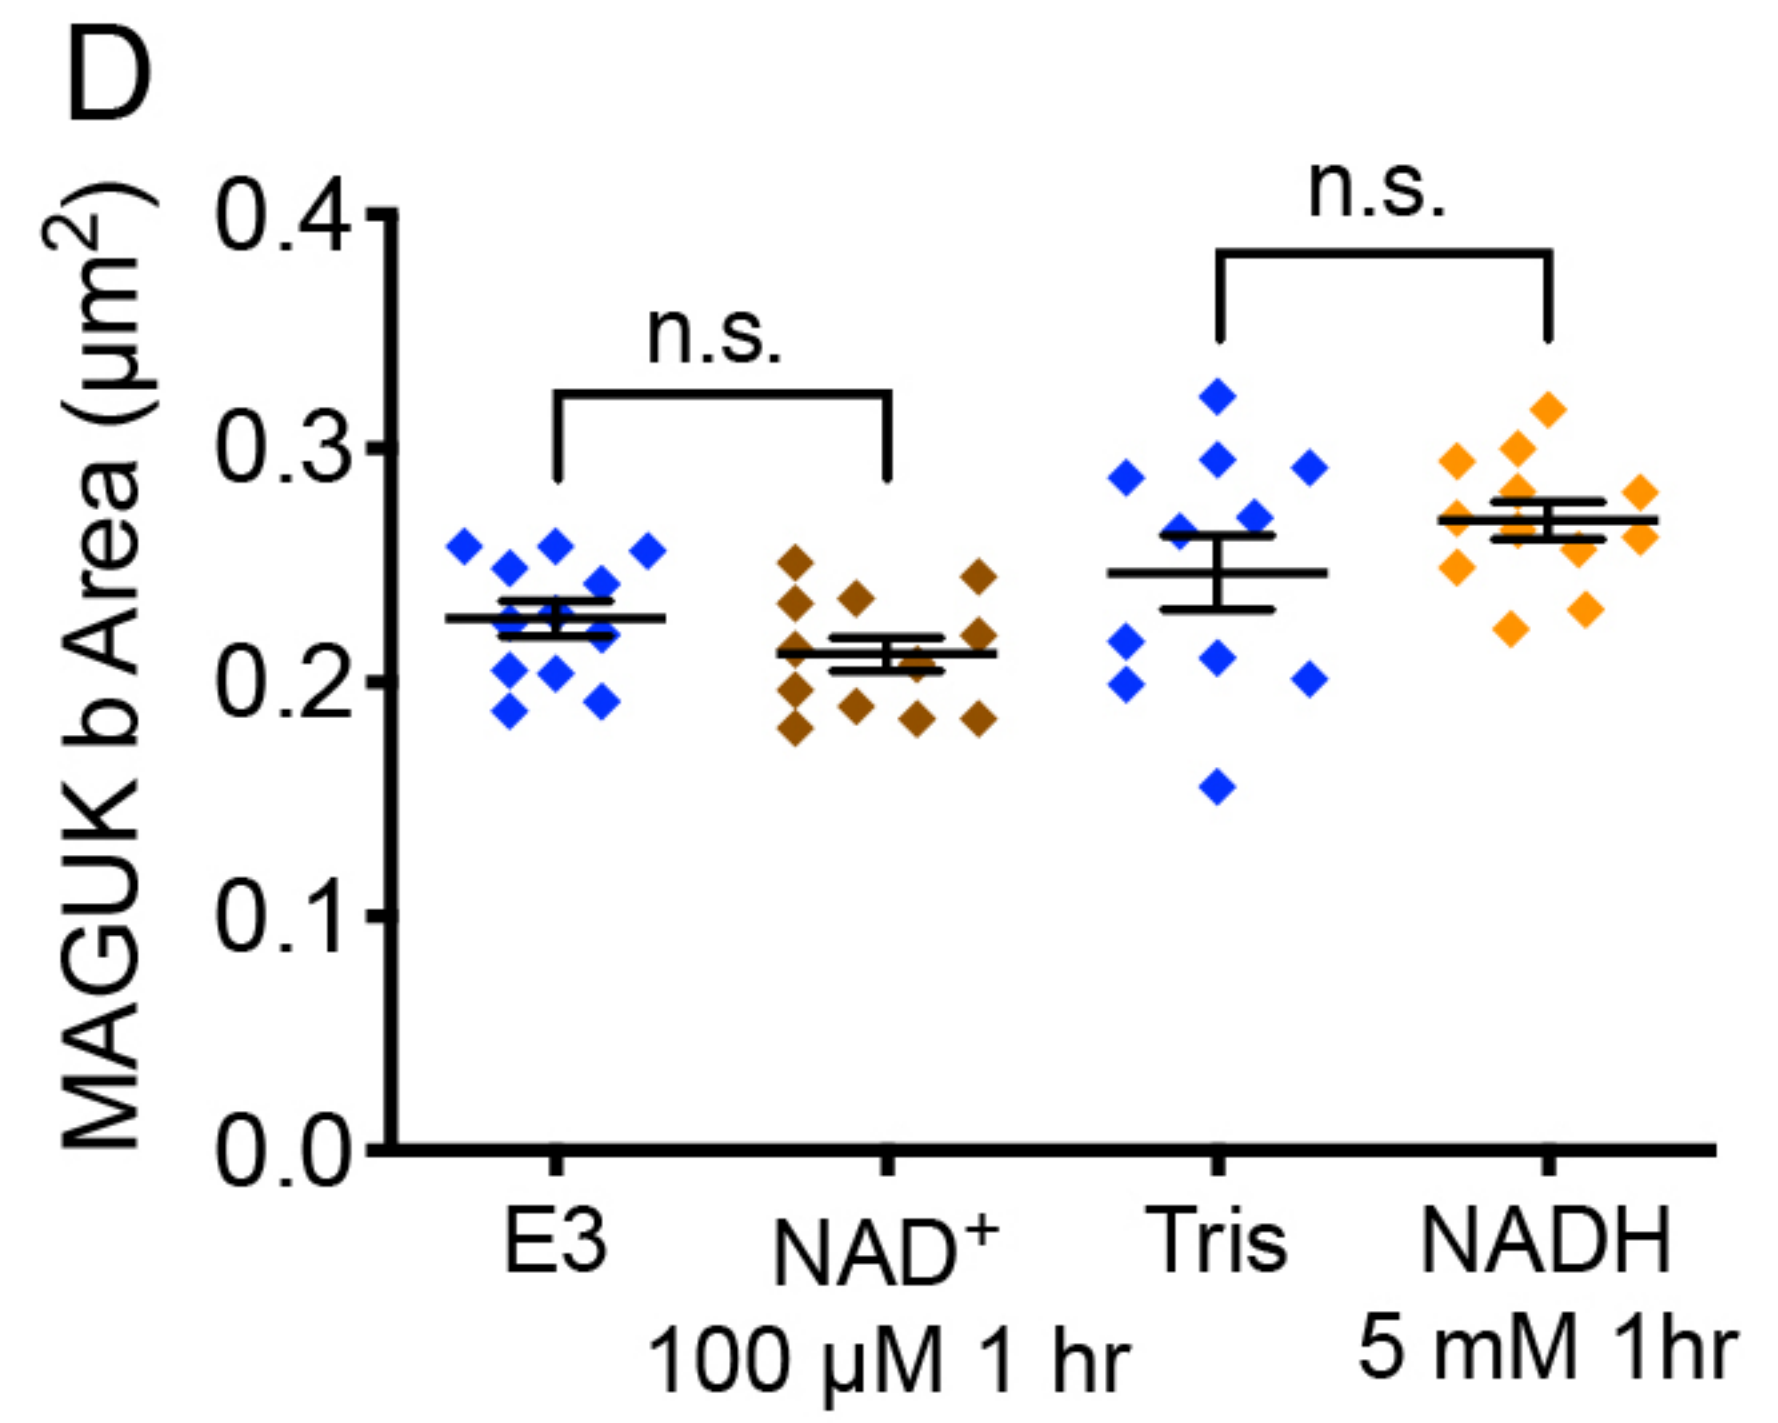

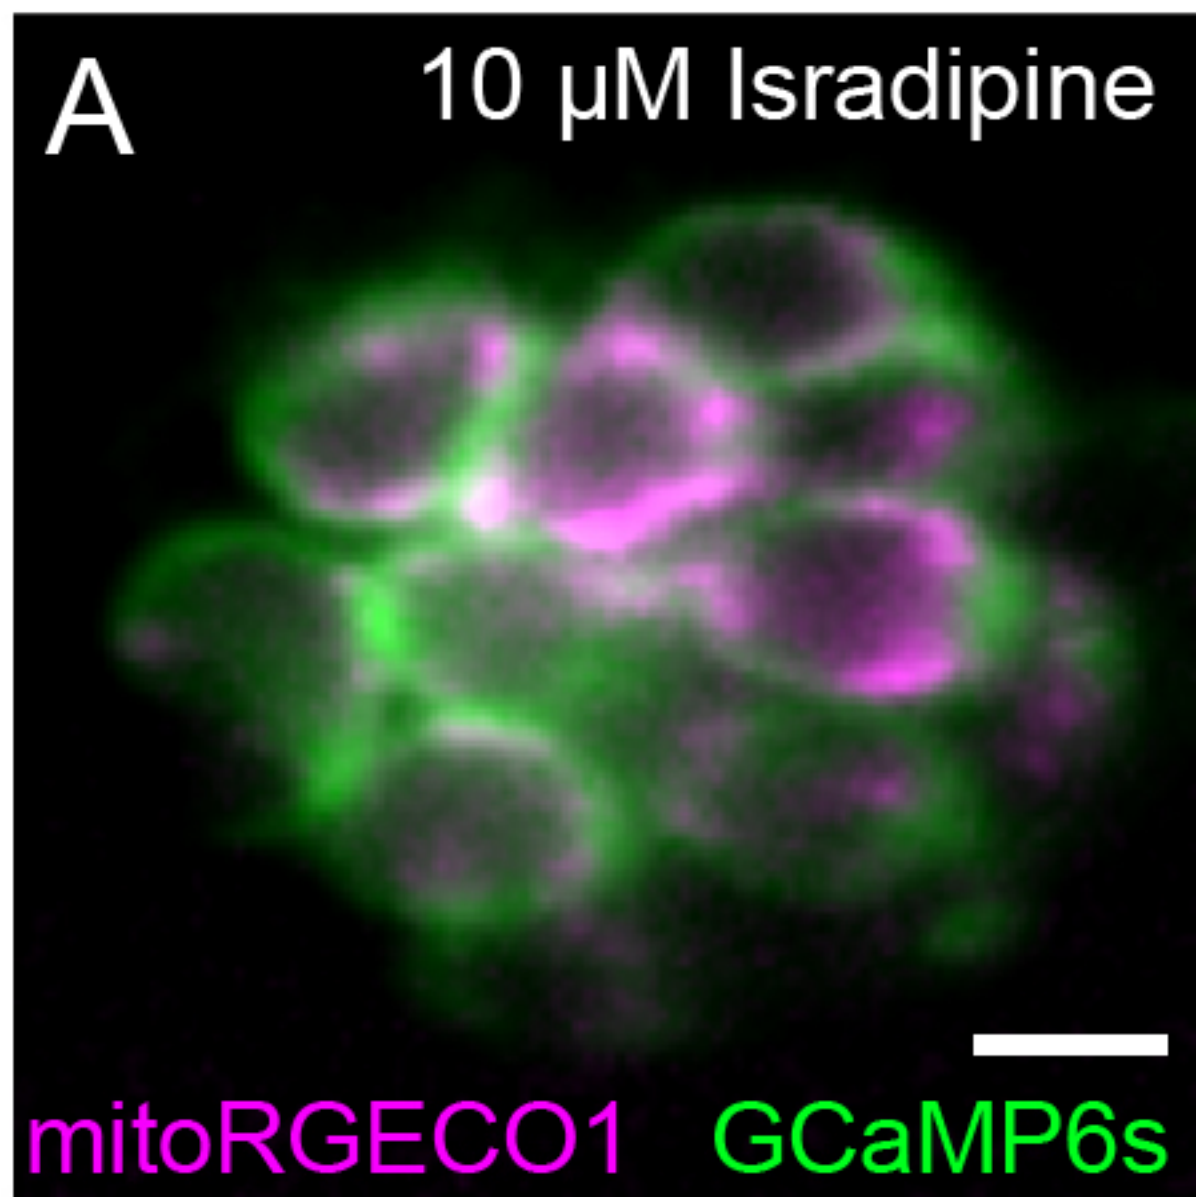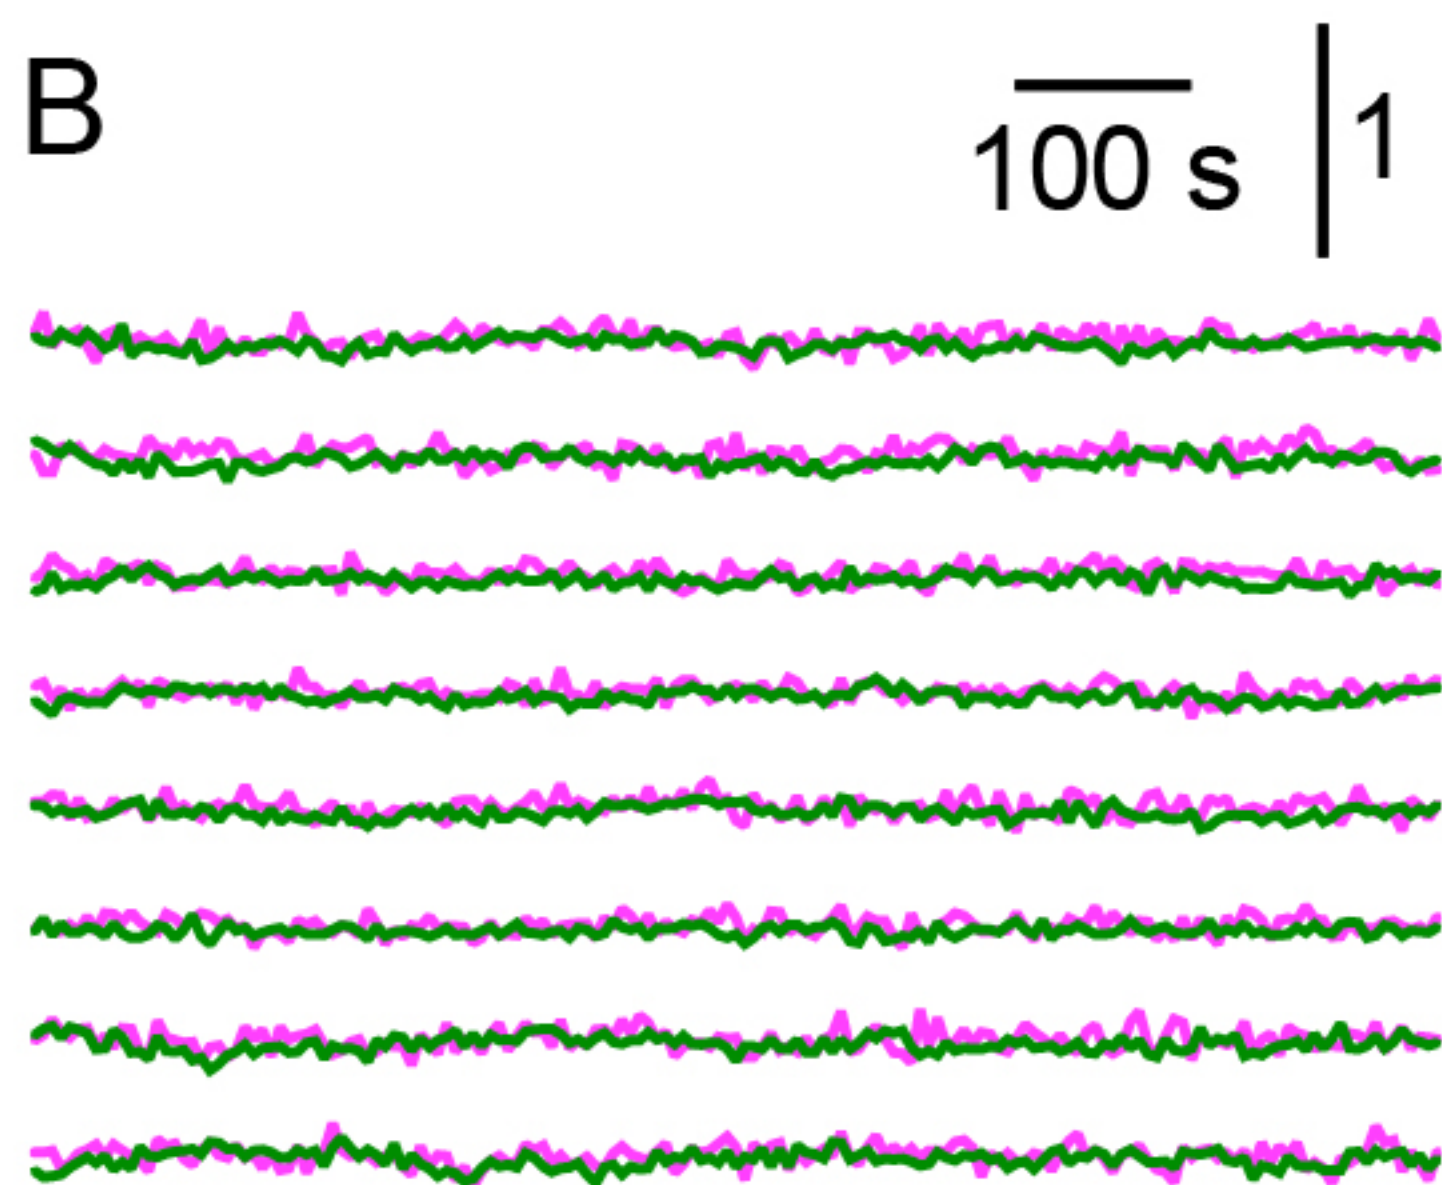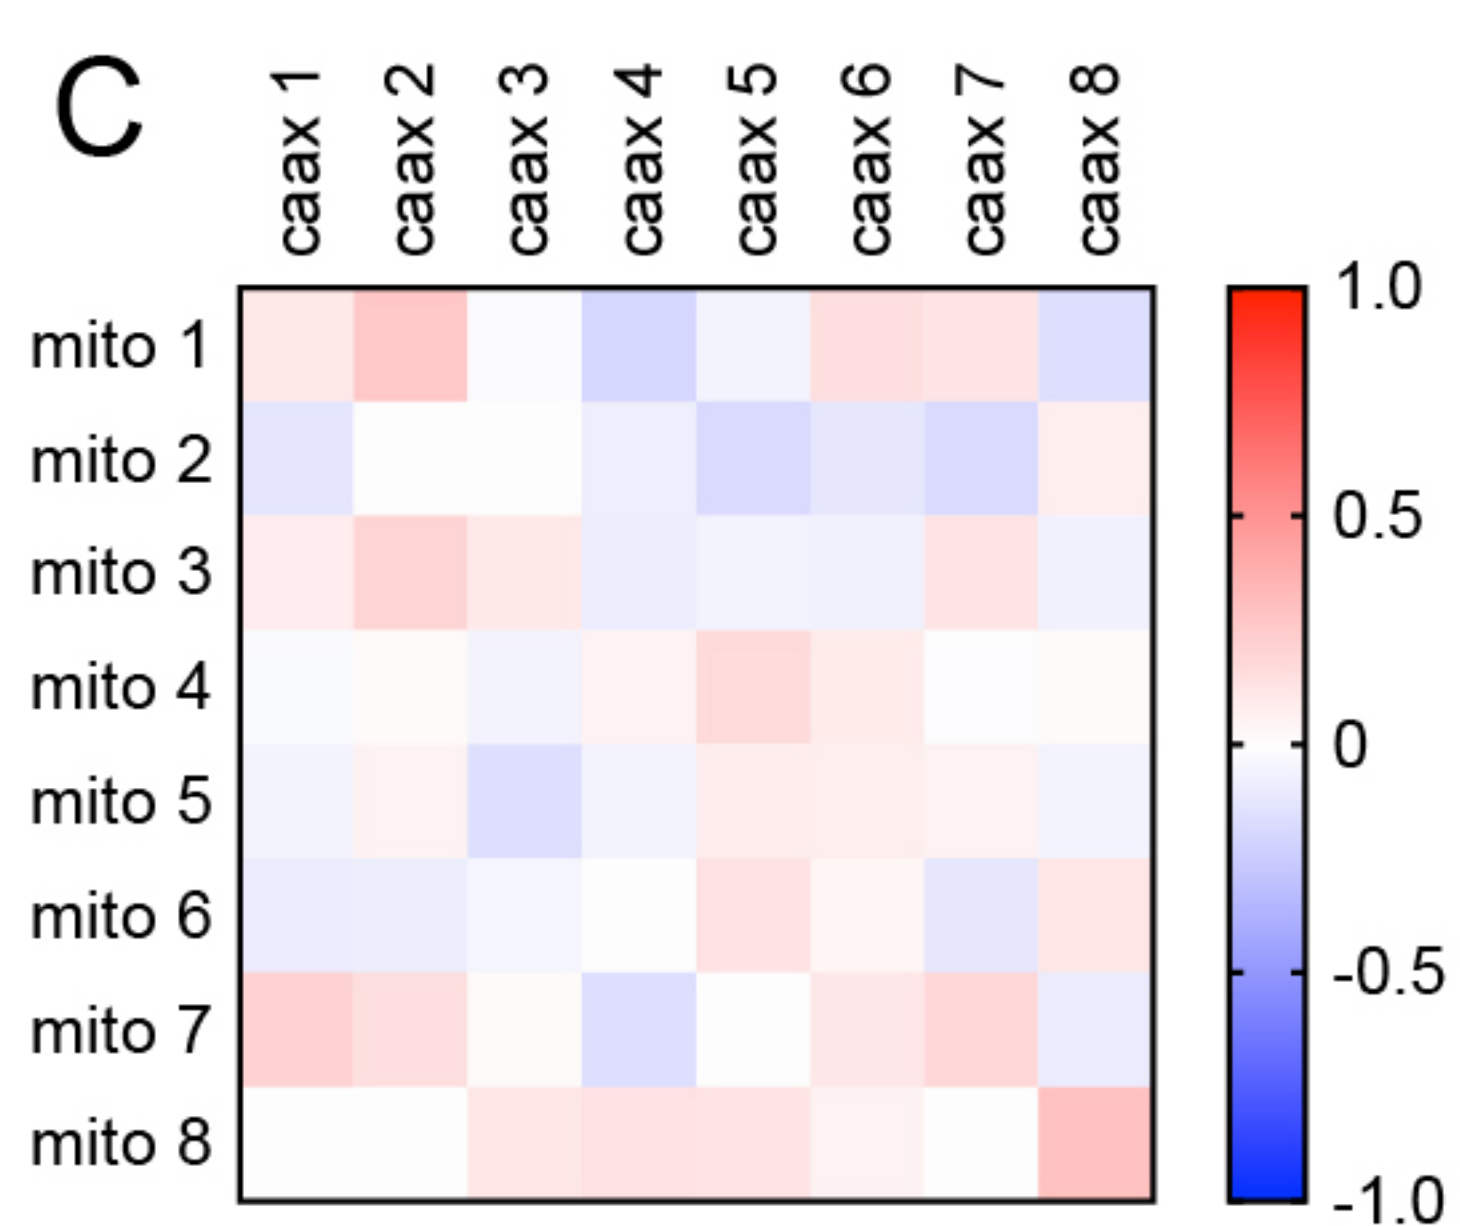

Source: https://www.biorxiv.org/content/10.1101/671701v1.full.pdf
